# **A complete electron microscopy volume of the brain of adult *Drosophila melanogaster***

Zhihao Zheng<sup>1,‡</sup>, J. Scott Lauritzen<sup>1,‡</sup>, Eric Perlman<sup>1,6</sup>, Camenzind G. Robinson<sup>1</sup>, Matthew Nichols<sup>1</sup>, Daniel Milkie<sup>2,7</sup>, Omar Torrens<sup>2</sup>, John Price<sup>3</sup>, Corey B. Fisher<sup>1</sup>, Nadiya Sharifi<sup>1</sup>, Steven A. Calle-Schuler<sup>1</sup>, Lucia Kmecova<sup>1</sup>, Iqbal J. Ali<sup>1</sup>, Bill Karsh<sup>1</sup>, Eric T. Trautman<sup>1</sup>, John Bogovic<sup>1</sup>, Philipp Hanslovsky<sup>1</sup>, Gregory S. X. E. Jefferis<sup>4</sup>, Michael Kazhdan<sup>5</sup>, Khaled Khairy<sup>1</sup>, Stephan Saalfeld<sup>1</sup>, Richard D. Fetter<sup>1,8</sup>, Davi D. Bock<sup>1\*</sup>

1. Janelia Research Campus, Howard Hughes Medical Institute, Ashburn, VA 20147

2. Coleman Technologies, Inc., Newtown Square, PA 19073

3. Hudson Price Designs, LLC, Hingham, MA 02043

4. Division of Neurobiology, MRC Laboratory of Molecular Biology, Cambridge, CB2 0QH, UK

5. Department of Computer Science, Johns Hopkins University, Baltimore, MD 21218

6. Present address: Center for Imaging Science, Johns Hopkins University, Baltimore, MD 21218

7. Present address: Janelia Research Campus, Howard Hughes Medical Institute, Ashburn, VA 20147

8. Present address: Department of Biochemistry & Biophysics, University of California, San Francisco 94158

\* [bockd@janelia.hhmi.org](mailto:bockd@janelia.hhmi.org)

<sup>‡</sup>These authors contributed equally to this work.

## 21 **SUMMARY** (150 words)

22 *Drosophila melanogaster* has a rich repertoire of innate and learned behaviors. Its 100,000–  
 23 neuron brain is a large but tractable target for comprehensive neural circuit mapping. Only  
 24 electron microscopy (EM) enables complete, unbiased mapping of synaptic connectivity;  
 25 however, the fly brain is too large for conventional EM. We developed a custom high-throughput  
 26 EM platform and imaged the entire brain of an adult female fly. We validated the dataset by  
 27 tracing brain-spanning circuitry involving the mushroom body (MB), intensively studied for its  
 28 role in learning. Here we describe the complete set of olfactory inputs to the MB; find a new cell  
 29 type providing driving input to Kenyon cells (the intrinsic MB neurons); identify neurons  
 30 postsynaptic to Kenyon cell dendrites; and find that axonal arbors providing input to the MB  
 31 calyx are more tightly clustered than previously indicated by light-level data. This freely available  
 32 EM dataset will significantly accelerate *Drosophila* neuroscience.

33

## 34 **KEYWORDS**

35 Electron microscopy, connectomics, neural circuits, *Drosophila melanogaster*, mushroom body,  
 36 olfaction, image stitching

37

## 38 **HIGHLIGHTS**

- 39 - A complete adult fruit fly brain was imaged, using electron microscopy (EM)
- 40 - The EM volume enables brain-spanning mapping of neuronal circuits at the synaptic level
- 41 - Olfactory projection neurons cluster more tightly in mushroom body calyx than expected from
- 42 light-level data

- 43 - The primary postsynaptic targets of Kenyon cells (KCs) in the MB are other KCs, as well as the
- 44 anterior paired lateral (APL) neuron
- 45 - A newly discovered cell type, MB-CP2, integrates input from several sensory modalities and
- 46 provides microglomerular input to KCs in MB calyx
- 47 - A software pipeline was created in which EM-traced skeletons can be searched for within
- 48 existing large-scale light microscopy (LM) databases of neuronal morphology, facilitating cell
- 49 type identification and discovery of relevant genetic driver lines

## INTRODUCTION

Neural circuits are in large part made of neurons and the synapses connecting them. Maps of connectivity inform and constrain all models of how neuronal circuits transform information and subserve behavior (Braitenberg and Schüz, 1998; Marr, 1969; Sterling and Laughlin, 2015). Historically, anatomical maps of neuronal connectivity were inferred from light microscopy (LM) images of sparsely labeled neurons (Shepherd, 2016). Updated forms of this approach remain important to this day (e.g. Wertz et al., 2015; Wolff et al., 2015), as do electrophysiological measurements of connectivity between small groups of neurons (Ko et al., 2011; Perin et al., 2011; Song et al., 2005). However, for a given volume of brain tissue, these methods lack the resolution to map all synapses between all neurons, which may result in an undersampled description of neuronal network topology (Helmstaedter et al., 2008).

Electron microscopy (EM) is the only method capable of simultaneously resolving all neuronal processes and synapses in a given volume of brain tissue – a requirement if one wishes to make complete maps of neuronal connectivity at the synapse level (or 'connectomes'; Lichtman and Sanes, 2008). However, generating EM volumes of any appreciable size is technically challenging (Briggman and Bock, 2012; Harris et al., 2006; Helmstaedter, 2013). Nanometer-scale image voxels must be acquired over a spatial extent sufficient to encapsulate circuits of interest, typically tens to hundreds of microns at a minimum. Volume EM for connectomics has therefore traditionally been limited to exceedingly small organisms, such as the nematode (White et al., 1986) and the larval ascidian (Ryan et al., 2016), or to small subvolumes from (for example) the fly optic medulla (Takemura et al., 2008), cat thalamus (Hamos et al., 1987), and macaque visual cortex (McGuire et al., 1991).

Recent technical advances have enabled increased acquisition speed and automation of the imaging pipeline, producing larger EM volumes than were previously attainable (reviewed in

Briggman and Bock, 2012; see also Eberle et al., 2015; Kuwajima et al., 2013; Xu et al., 2017). Circuit diagrams mapped in these larger EM volumes have yielded new insights into (for example) the network architecture of the larval fly (Ohshima et al., 2015), the optic medulla of the adult fly (Takemura et al., 2017b), the zebrafish olfactory bulb (Wanner et al., 2016), and the mammalian retina (Briggman et al., 2011; Lauritzen et al., 2016), thalamus (Morgan et al., 2016), and neocortex (Bock et al., 2011; Kasthuri et al., 2015; Lee et al., 2016). Large EM volumes have also revealed surprising new findings in cellular neuroanatomy, such as the differential distribution of myelin on axons depending on neuronal subtype (Micheva et al., 2016; Tomassy et al., 2014). However, imaging infrastructure for volume EM continues to limit the scale of connectomics investigations.

Here we report next-generation hardware and software for high throughput acquisition and processing of EM data sets. We apply this infrastructure to image the entire brain of a female adult fruit (aka vinegar) fly, *Drosophila melanogaster* (Figure 1A). At approximately  $8 \times 10^7 \mu\text{m}^3$ , this volume is nearly two orders of magnitude larger than the next-largest complete brain imaged at sufficient resolution to trace synaptic connectivity, that of the first instar *Drosophila* larva (Ohshima et al., 2015).

*D. melanogaster* is an important model organism for neurobiology research, owing to its rich repertoire of innate and learned behavior (Hampel et al., 2015; Heisenberg and Wolf, 1984; Hoopfer, 2016; Kim et al., 2017; Ofstad et al., 2011; Oswald and Waddell, 2015; Pavlou and Goodwin, 2013; von Reyn et al., 2014), electrophysiological accessibility (e.g. Hige et al., 2015; Wilson et al., 2004), relatively small size (Figure 1A), and the stereotypy of and genetic access to most of the ~100,000 neurons in its brain (Aso et al., 2014; Chiang et al., 2011; Jenett et al., 2012; Kvon et al., 2014; Milyaev et al., 2012; Pfeiffer et al., 2010). In the fly brain, each morphological cell type usually consists of one to a few neurons per hemisphere, with

98 stereotyped neuronal arbors reproducible across individuals with a precision of ~10 microns  
 99 (Costa et al., 2016; Jefferis et al., 2007; Lin et al., 2007). Thousands of genetic driver lines for  
 100 specific subsets of cell types (Jenett et al., 2012; Kvon et al., 2014), or even single cell types  
 101 (Aso et al., 2014; Grabe et al., 2015; Wolff et al., 2015), enable *in vivo* manipulation of neuronal  
 102 physiology and the construction of searchable databases of neuronal morphology (Chiang et al.,  
 103 2011; Costa et al., 2016; Milyaev et al., 2012).

104 We leveraged the stereotypy of fly neuronal morphology to validate that the EM volume was  
 105 suitable for tracing brain-spanning neuronal circuitry. We focused on the olfactory projection  
 106 neurons (PNs), which are thoroughly described at the light microscopy (LM) level (Jefferis et al.,  
 107 2007; Lin et al., 2007; Tanaka et al., 2004) (Figure 1B, Figure S1). On each side of the brain,  
 108 the dendrites of ~150 PNs innervate ~50 glomeruli of the antennal lobe (AL). Each glomerulus is  
 109 morphologically identifiable (Couto et al., 2005; Grabe et al., 2015; Stocker et al., 1990) and  
 110 receives input from a stereotyped set of olfactory receptor neurons (ORNs), resulting in  
 111 reproducible PN odorant tunings across animals (Wilson, 2013; Wilson et al., 2004). PN axons  
 112 project from the AL to the lateral horn (LH), which is thought to subserve stereotyped behavioral  
 113 responses to odorants (Heimbeck et al., 2001; Jefferis et al., 2007; Ruta et al., 2010). Along the  
 114 way to the LH, most PNs send collaterals into the calyx of the mushroom body (MB), a locus of  
 115 learning, recall, and synaptic plasticity (Davis, 2011; Heisenberg, 2003; Oswald and Waddell,  
 116 2015). Most PN types project to the MB calyx via the medial antennal lobe tract (mALT), but  
 117 several travel in secondary tracts, and a few bypass calyx entirely and project only to LH (Frank  
 118 et al., 2015; Stocker et al., 1990; Tanaka et al., 2012).

119 To explore whether the EM volume could be used to make new discoveries as well as verify  
 120 existing knowledge, we examined a subset of the circuitry downstream to PNs in the MB calyx.  
 121 The *Drosophila* MB has ~2,000 intrinsic neurons on each side of the brain called Kenyon cells

(KCs). Each KC projects a highly variable dendritic arbor into the calyx, which terminates in elaborations known as claws (Figure S1). Claws from many KCs converge to wrap individual PN boutons in a characteristic structure called the microglomerulus (Yasuyama et al., 2002), and each KC receives input from multiple PNs of diverse types (Caron et al., 2013; Gruntman and Turner, 2013). KCs sample this input in what is thought to be a random fashion (Caron et al., 2013), although some biases have been noted (Gruntman and Turner, 2013). In order to fire action potentials, KCs require a threshold number of input PNs to be coactive (Gruntman and Turner, 2013); the firing pattern of KCs is therefore thought to be a combinatorial and sparse representation of olfactory stimuli. The dendrites of KCs also receive inhibitory and modulatory synapses from a variety of other cell types within the calyx, and have presynaptic release sites, which target unknown cell types (Butcher et al., 2012; Christiansen et al., 2011). KC axons project from the calyx to the MB lobes, where they synapse onto MB output neurons (MBONs). KC-MBON synapses are modulated by rewarding or punishing signals from dopaminergic afferent neurons (DANs; Aso et al., 2012; Burke et al., 2012; Liu et al., 2012); this plasticity underlies olfactory memory formation (Hige et al., 2015; Oswald et al., 2015; Sejourne et al., 2011).

In the current work, we surveyed all microglomeruli in the main MB calyx and traced their bouton inputs sufficiently to identify the originating cell's type, resulting in a description of the complete set of olfactory inputs to the MB. Although most MB input originated from olfactory PNs, we discovered a previously unknown cell type providing bouton input to KC claws. To map unknown connectivity within the calyx, we also identified the cell types of the KC postsynaptic targets. Finally, we found more clustering of PN axonal afferents within the MB calyx than was predicted from light microscopy (LM) data, which may bias the sampling of olfactory input from PNs by

145 KCs. These findings demonstrate the utility of this whole-brain dataset for mapping both known  
146 and new neural circuit connections.

147

## 148 **RESULTS**

### 149 **TEMCA2: a second-generation transmission EM camera array**

150 Current volume EM methods generally trade off between convenient sample handling, high  
151 image resolution, and rapid image acquisition (Briggman and Bock, 2012). Transmission EM  
152 (TEM) camera arrays (TEMCA2s) offer high signal-to-noise and high throughput imaging of serial  
153 thin sections (Bock et al., 2011; Lee et al., 2016). Post-section staining increases sample  
154 contrast over alternative methods that rely on *en bloc* staining, and features of interest may be  
155 re-imaged at higher magnifications. However, lossless serial sectioning and imaging of  
156 thousands of sections is a technically challenging, manual process; the image data are  
157 anisotropic (i.e., each voxel is narrower than it is tall, typically 4 x 4 x 45 nm), which is  
158 inconvenient for processing by automated segmentation pipelines; and large sample areas  
159 represented by mosaics of thousands of overlapping individual camera images necessitate a  
160 sophisticated and scalable stitching pipeline (Saalfeld et al., 2012; Wetzel et al., 2016).

161 Despite these challenges, the potential for gains in throughput persuaded us to develop a  
162 second-generation system (TEMCA2) prior to undertaking a *Drosophila* whole-brain imaging  
163 effort (Figure 1; Figure S2). To achieve high frame rates in TEM, electron dose is simply  
164 increased until the sensors are saturated in the desired image frame integration period. This  
165 option is generally not available in scanning EM (SEM)-based approaches, since coulomb  
166 repulsion between electrons limits the maximum current per beam (Denk and Horstmann,  
167 2004). We constructed a 2 x 2 array of high frame-rate sCMOS-based scientific cameras and

coupled them with optical lenses custom-designed for imaging TEM scintillators (Figure 1C). At this higher electron dose, images are acquired in 4 frames of 35 ms exposure each. Standard TEM sample holders and goniometer stages take several seconds to step and settle, which is not fast enough for this imaging scheme. Therefore, we built a high speed, piezo-driven single axis Fast Stage (Figure 1D; Figure S2B; Movie S1), with a sample holder designed to accept standard-diameter (3 mm) TEM sample grids (Figure 1E-F). The Fast Stage has the same shape as a standard sample holder, so that the TEM's standard multi-axis stage can provide motion in other axes. Step-and-settle with the Fast Stage typically completed in 30-50 ms (Figure S2C-D). On-line analysis of sample drift between subsequent frames was used to determine whether stability was sufficient to acquire high-quality images, and frames were translated before summation to correct for small (16 nm or less) drift between frames. Net imaging throughput using the TEMCA2 system is ~50 MPix/s, roughly six times faster than the first-generation TEMCA (Bock et al., 2011). For the whole-brain imaging effort, we constructed two TEMCA2 systems, yielding an order of magnitude increase relative to previously available EM imaging throughput.

### **Autoloader: a hands-free robot for automatic and reliable TEM imaging**

To allow unattended multi-day imaging, reduce risk to the samples, and decrease the overhead of sample exchange (10 minutes out of every 30 in typical TEMCA2 operation), we built a robotic system (Autoloader) capable of autonomous sample exchange and imaging of the TEM grids (Figure 1G; Figure S2E-F; Movies S2-3). Although automatic sample exchange systems for TEMs have been built (Lefman et al., 2007; Potter et al., 2004), their capacity and reliability were insufficient for the whole-brain imaging effort described here. The Autoloader mounts to an accessory port on the TEM, has its own vacuum system, and completely replaces the off-the-shelf stage system. To better support automatic sample handling, we made custom 100  $\mu$ m-

thick beryllium-copper sample support grids, each etched with unique ID numbers and spatial fiducial marks to guide machine vision-based pick-and-place software for grid exchange (Figure 1F). Each support grid is stored in a 64-pocket cassette, and each cassette is stored in an 8-cassette magazine (Figure 1H). The Autoloader grid positioning system (GPS; Figure 1I-K) provides high-speed multi-axis grid positioning. A pre-aligner is available for optimizing sample orientation (Figure 1L; Movies S2-3). Automatic grid exchange is accomplished in about 5 minutes without breaking vacuum.

### **Application of EM infrastructure to image a complete adult fly brain**

For a given electron dose, a higher contrast sample scatters more electrons, resulting in a higher quality image (Denk and Horstmann, 2004). We therefore optimized fixation and embedding procedures for high membrane contrast, while preserving high quality ultrastructure. A series of 7,060 sections, encompassing the entire brain, was prepared manually (Figure S3). Nearly all (99.75%) targeted serial section data were successfully acquired. Ten sections were lost prior to imaging, and regions of some sections with debris or cracks in the support film were excluded from imaging. Medium- and large-diameter neurites can still be readily traced through the missing data, with minimal anticipated impact on traced networks (Schneider-Mizell et al., 2016). The resulting EM dataset comprises ~21 million images occupying ~106 TB on disk.

The data were acquired over a period of ~16 months. Eighty-three percent of imaged sections were acquired with a TEMCA2 system (4.3 million Fast Stage moves), while the Autoloader was still in development, and 17% of imaged sections were acquired by the Autoloader (3.5 million GPS moves; ~6,800 machine vision-guided steps to pick, pre-align, and re-stow each grid). Eighty-two percent of Autoloader grid exchanges were successful; 14% were automatically halted and the grids re-stowed, usually due to variations in the manual placement of grids in the Autoloader cassettes or inhomogeneities in the support film; and 4% required manual control of

216 the Autoloader for re-stowing. Re-stowed grids were removed from the Autoloader and imaged  
217 manually with a Fast Stage on a TEMCA2. No sections were lost or damaged due to Autoloader  
218 or Fast Stage malfunction.

219 The quality of acquired image data was high (Figure 2; Movie S4). Whether a given EM volume  
220 has sufficient resolution to reliably detect synapses and trace fine neuronal processes can  
221 currently only be evaluated empirically (see below). In general, however, image resolution  
222 increases not only with decreasing voxel size, but also with increasing image signal-to-noise  
223 (S/N). We found that the S/N of images in this dataset equals or exceeds that of other publicly  
224 available datasets (Figure 2G; Figure S4). Furthermore, it is straightforward to re-image targeted  
225 regions of interest in the full adult brain volume at higher magnification (Figure S5A-B).

## 226 **Volume reconstruction and validation of tracing by NBLAST-based geometry matching**

227 We developed cluster-backed software to stitch images from a single thin section into a  
228 coherent mosaic, and then to register stitched mosaics across thousands of serial sections into  
229 an aligned volume (Figure 2A-G), a process known as ‘volume reconstruction’. Calibration  
230 mosaics were used to correct lens distortions (Kaynig et al., 2010), and a scalable and linear  
231 solver was developed to stitch all section mosaics independently. During alignment of the  
232 volume, approximately 250 sections were found to be misordered. These misordered sections  
233 were automatically detected and re-ordered over several iterations of coarse and fine series  
234 alignment (Hanslovsky et al., 2017). With this software infrastructure, traced neurons can be  
235 projected across successive volume reconstructions, allowing tracing work to begin before  
236 imaging of the whole brain was complete. Furthermore, high- and low-dose imaging of robust  
237 and fragile areas of a section, respectively, could be stitched together seamlessly (Figure S5 C-  
238 E). Intra-mosaic variations in image tile intensity, created by variations in section thickness,  
239 electron beam etching, or deposition of contaminants from post-staining or section pickup, were

240 corrected (Figure S5 F-I) using a scalable implementation of an existing algorithm (Kazhdan et  
241 al., 2010).

242 To test the reproducibility of tracing in the whole-brain EM dataset, three independent teams,  
243 each comprising two tracers, targeted the same KC for anatomical reconstruction (Figure S6). In  
244 the fly brain, microtubule-free neurites ('twigs') as fine as 40 nm in diameter tend to extend for  
245 short distances before joining larger, microtubule-containing 'backbone' neurites (Schneider-  
246 Mizell et al., 2016). KC claws are good examples of 'twigs', whereas their dendritic trunks and  
247 the axonal neurite leaving the calyx are larger-diameter 'backbones'. The neuronal arbors and  
248 associated synapses reconstructed by each team were essentially identical for both twigs and  
249 backbones. PN to KC claw inputs with high synapse counts were detected in all three  
250 reconstructions (Figure S6C). Consistent with a tracing approach biased toward false negatives  
251 rather than false positives (Methods), one low-synapse-count input was missed by one of the  
252 tracing teams (Figure S6, red asterisks). These independent reconstructions demonstrate that  
253 the EM data support tracing of neuronal connectivity, even in challenging neuropil such as the  
254 microglomeruli of the MB calyx.

255 The stereotypy of the fly brain allows identification and comparison of fluorescently labeled  
256 neurons across individuals, by warping brains imaged at the light level to a standard template  
257 brain (Chiang et al., 2011; Costa et al., 2016; Manton et al., 2014; Milyaev et al., 2012). We  
258 developed tools to register LM datasets to the EM-imaged brain (Methods), allowing precise  
259 overlay of LM onto EM data across multiple brains (Figure 3A-D). This approach can also be  
260 used to analyze EM-traced neurons within existing frameworks for fly neuroanatomy. For  
261 example, the geometric search algorithm, NBLAST (Costa et al., 2016), can be used to search  
262 for an EM-traced PN skeleton thought to arise from the AL glomerulus VM2 (Figure 3E-G) in the  
263 FlyCircuit single neuron collection (Chiang et al., 2011). The VM2 PN is the top hit arising from

264 this query (Figure 3G), with an NBLAST mean score of 0.638. Remarkably, this NBLAST score  
265 is within the range of top scores for the 6 LM-imaged VM2 neurons in the FlyCircuit database  
266 when compared with one another (0.635-0.706), consistent with the high qualitative similarity of  
267 the EM-traced and LM-imaged PNs (Figure 3G).

268 **EM-based reconstruction of complete olfactory input to the MB calyx reveals tight**  
269 **clustering of homotypic PN arbors**

270 To systematically compare EM-based PN reconstructions with available LM data, we identified  
271 all PN to KC microglomeruli in the main MB calyx on the right side of the fly's brain, and traced  
272 the originating PNs sufficiently to identify their subtype (Figure 4). We classified olfactory PNs  
273 known to arise from a single glomerulus in AL based on assessment of each PN's dendritic  
274 distribution in AL (Figure 4B) and its axonal arbor in LH. We found that the great preponderance  
275 of input to the MB main calyx is olfactory, consistent with LM data. Of the 576 microglomerular  
276 boutons in main calyx, 500 arose from olfactory PNs (87%, from 120 PNs). Of these, 20 boutons  
277 (3%) arose from 8 multiglomerular PNs. The other inputs to main calyx included 50 boutons  
278 from thermosensory PNs (9%, arising from 8 neurons); 9 boutons from other PNs (2%, arising  
279 from 5 neurons), traveling either via tracts alternative to the mALT (7 boutons from 4 PNs) or  
280 from the subesophageal region (2 boutons from 1 putative PN; data not shown); and 17 boutons  
281 (3%) arising from a previously unknown neuron that we name MB-CP2 and describe further  
282 below. This survey located 52 out of 53 previously described olfactory glomeruli; the existence  
283 of the missing glomerulus, DL6 has been disputed (Grabe et al., 2015). We also found 3  
284 neurons arising from glomeruli VC5 or VC3I, which we could not disambiguate based on our  
285 tracing data. These glomeruli are not consistently divided in the literature, and the molecular  
286 identity of their incoming olfactory receptor neurons is not yet clear.

287 Despite these caveats, nearly all (50/53, 94%) previously described subtypes of uniglomerular  
 288 olfactory PNs were unambiguously identified (Grabe et al., 2015), setting the stage for future  
 289 trans-synaptic mapping of circuitry downstream of molecularly identified olfactory pathways in  
 290 the fly brain. The arbors of selected subtypes formed concentric clusters in MB main calyx  
 291 (Figure 4C), consistent with previous LM data (Tanaka et al., 2004). Unsupervised clustering  
 292 based on NBLAST score grouped PNs of the same assigned type (Figure 4D), and in nearly all  
 293 cases, the expert PN type assignments and NBLAST scores were in good agreement (Table  
 294 S1). The number of PNs found to arise from each glomerulus (Figure 4E) was also in excellent  
 295 agreement with recent LM data (Grabe et al., 2015).

296 We found that PNs arising from the same glomeruli often show much tighter clustering (Figure  
 297 5, Figure S7) than predicted from LM data pooled across multiple animals (Jefferis et al., 2007).  
 298 The PN cluster at the center of the concentrically arranged arbors shown in Figure 4C (arising  
 299 from DA1, DC3, and VA1d glomeruli) was also qualitatively tighter in the EM data than in LM  
 300 data pooled across multiple animals (Figure 5A, bottom row). Quantification of the average  
 301 distance between homotypic PNs revealed that intra-animal arbors are significantly more  
 302 clustered than arbors from multi-animal LM data (Figure 5B-C). A similar result was obtained  
 303 based on NBLAST score differences (Figure S7B-C). The tight clustering of EM-traced PNs  
 304 suggests developmental co-fasciculation of homotypic inputs, and may bias the sampling of  
 305 olfactory input by KCs (see Discussion).

### 306 **A previously unknown cell type, MB-CP2, provides input to Kenyon cell claws**

307 To assess the utility of the whole-brain EM dataset for characterizing previously unknown cell  
 308 types, we chose to make a fuller reconstruction of one of the unidentified microglomerular inputs  
 309 to the MB calyx mentioned above, which we name MB-CP2 (“Mushroom Body Calyx  
 310 Pedunculus #2”; Figure 6, Movie S5), per the naming convention of Tanaka et al. (2008). We

311 traced this neuron's backbone to completion as well as that of its equivalent on the contralateral  
 312 hemisphere (Figure 6A). The same 10 neuropil compartments were symmetrically innervated by  
 313 each MB-CP2 neuron on either side of the brain (Figure 6A,F). In contrast to PNs, which receive  
 314 input from olfactory receptor neurons (ORNs), MB-CP2 receives input from higher-order  
 315 compartments in the protocerebrum, far from the sensory periphery (Movie S5). These include  
 316 the superior medial protocerebrum (SMP), superior intermediate protocerebrum (SIP), and  
 317 superior lateral protocerebrum (SLP), which are relatively little-studied compartments innervated  
 318 by both sensory and motor neurons (Tschida and Bhandawat, 2015). MB-CP2 dendrites in the  
 319 MB pedunculus and  $\gamma 1$  compartment of the MB lobes are also postsynaptic to KCs, specifically  
 320 the  $\gamma$  (Figure 6B-C) and  $\gamma d$  (data not shown) subtypes. In the MB main calyx, MB-CP2 provides  
 321 microglomerular bouton input to all 5 olfactory KC subtypes ( $\gamma$ ,  $\alpha\beta c$ ,  $\alpha\beta s$ ,  $\alpha'\beta'm$ , and  $\alpha'\beta'ap$ ), but  
 322 only in the anteroventral main calyx (Figure 6D-E). In the MB dorsal accessory calyx (dAC),  
 323 which receives gustatory, thermosensory, and visual inputs (Kirkhart and Scott, 2015; Vogt et  
 324 al., 2016; Yagi et al., 2016). MB-CP2 is presynaptic to  $\alpha\beta p$  KCs throughout the entire dAC (data  
 325 not shown). The two MB-CP2 neurons may therefore provide multimodal and recurrent  
 326 feedback from  $\gamma$  KC axons to a subset of KC dendrites in the main calyx, adding to the set of  
 327 known MB recurrent networks (Aso et al., 2014; Oswald and Waddell, 2015).

### 328 **Identification of cell types post-synaptic to Kenyon cells in the MB calyx**

329 Kenyon cells are presynaptic in the MB calyx, but their postsynaptic targets are unknown  
 330 (Butcher et al., 2012; Christiansen et al., 2011). To identify these postsynaptic partners, we  
 331 annotated all presynaptic release sites arising from 3 KCs of each subtype ( $\gamma$ ,  $\alpha\beta c$ ,  $\alpha\beta s$ ,  $\alpha'\beta'm$ ,  
 332 and  $\alpha'\beta'ap$ ) with dendrites in the main calyx (Aso et al., 2014). We then traced their postsynaptic  
 333 targets to classification (Figure 7; see Methods). All KC presynaptic release sites targeted  
 334 multiple postsynaptic processes. Consistent with immunohistochemical data (Christiansen et al.,

2011), most (82%; Table S2) pre-synaptic release sites were in  $\alpha\beta$ c-,  $\alpha\beta$ s-, or  $\gamma$  KCs, and 87% of the release sites were distributed along KC dendrites outside of claws. Of the 15 cell types known to arborize within the MB calyx (Aso et al., 2014; Burke et al., 2012; Busch et al., 2009; Chen et al., 2012; de Haro et al., 2010; Mao and Davis, 2009; Roy et al., 2007; Tanaka et al., 2008), we found that a small subset contributes most of the postsynaptic neurites (4 subtypes contributing 75% of neurites; see Table S2). These are: the dendrites of other KCs; the APL, a wide-field inhibitory neuron that innervates the entire MB and sparsifies KC activity (Lin et al., 2014; Liu and Davis, 2009); MB-CP1, an MBON whose dendritic arbor innervates the calyx and pedunculus (Tanaka et al., 2008); and two MB-C1 neurons, a class of interneuron that innervates the calyx and lateral horn (Tanaka et al., 2008). Fourteen percent of fine postsynaptic neurites were too difficult to readily trace back to parent backbone. Intriguingly,  $\alpha'\beta'$  KCs were presynaptic only to APL and other KCs. A large fraction of KC presynaptic release sites therefore targets a specific and sparse subset of available cell types in calyx.

## DISCUSSION

Here we contribute a complete EM volume of an adult female *Drosophila melanogaster* brain for free use by the research community. We identified PNs from nearly all the olfactory PN subtypes, and then traced PN output across two synapses – from PNs to KCs, and from KCs to their post-synaptic targets in the MB calyx – demonstrating that this dataset supports tracing of brain-spanning neural circuitry at synaptic resolution. Cell type identification of PNs was helped by software to search EM-traced neuronal arbors for matches in large-scale morphological databases. With the PN types classified, any molecularly identified olfactory pathway in the fly brain can now be mapped, which will likely aid in the determination of circuit mechanisms underlying intrinsic and learned behavioral responses to odors. Since PN odorant tuning,

359 molecular identity, and morphology are all highly stereotyped, a great deal of information from  
 360 other experiments can be directly related to the circuits mapped in this dataset. This same  
 361 approach is generalizable to many other circuits underlying learned and intrinsic behaviors in  
 362 this animal.

363 Generation of volume EM data of this scale remains technically challenging across all stages of  
 364 the data pipeline. Our new generation of image acquisition hardware provided images with  
 365 excellent signal-to-noise and unmatched throughput. Many further optimizations of this  
 366 hardware are available. Emerging large-format, high-speed fiber-coupled cameras and direct  
 367 electron detectors may achieve imaging throughput comparable to the TEMCA2, while requiring  
 368 substantially lower electron dose due to their greater sensitivity (Ruskin et al., 2013). Multibeam-  
 369 SEM also shows great promise (Eberle et al., 2015), as do slower but higher resolution methods  
 370 such as parallel FIB-SEM imaging of slabs cut by hot knife methods (Xu et al., 2017). Low  
 371 resolution EM imaging, followed by high resolution re-imaging of synaptic connectivity in  
 372 selected sub-volumes, also holds promise for brain-spanning connectomics in larger animals  
 373 (Hildebrand et al., 2017). Manual sectioning of long series of thin sections is not routinely  
 374 replicable by most practitioners; efforts are currently underway to automate this process.

375 Stitching and registration of serial section mosaics at the scale of this dataset posed a  
 376 significant challenge. We developed scalable software for volume reconstruction and image  
 377 intensity correction, as well as a data store for managing the image transformations between  
 378 raw data and any given volume reconstruction. Although the resulting registration quality is  
 379 clearly sufficient for manual tracing efforts, remaining fine-scale imprecision may need to be  
 380 overcome before emerging automatic segmentation methods can be fully leveraged (Arganda-  
 381 Carreras et al., 2017; Beier et al., 2017; Januszewski et al., 2016). Early segmentation results  
 382 with subsets of this whole-brain dataset are nonetheless promising (Funke et al., 2016).

Our analysis of the MB main calyx revealed that PNs arising from the same glomerulus often cluster more tightly in the calyx than was expected from LM data pooled across many animals. Interestingly, the intra-animal dye-filled DM6 PN pairs in Figure 6 of (Kazama and Wilson, 2009) also are tightly clustered, although this result is anecdotal. The basis of this clustering may be developmental, with sister PNs arising from the same glomerulus or neuronal lineage (Spindler and Hartenstein, 2010) tending to co-fasciculate. Tight intra-animal clustering of PNs raises the possibility that the PN to KC connectivity matrix may be biased, rather than fully random. If boutons from a given PN type are clustered tightly in the calyx, and a given KC happens to have a distribution of claws centered on that PN cluster, then the KC will have greater opportunity to receive input from that PN type. This may explain the above-chance convergence of DA1, DC3, and VA1d PNs onto postsynaptic KCs observed by Gruntman and Turner (2013). Indeed, our EM reconstructions indicate that these three PN types are tightly clustered at the center of the MB calyx, consistent with the earlier LM data of Tanaka et al. (2004). However, the most thorough examination of PN to KC connectivity to date, using partial connectivity data pooled across many animals, was consistent with a model in which the PN to KC connectivity matrix is entirely random (Caron et al., 2013). More comprehensive mapping of the KC population postsynaptic to PNs will help determine whether intra-animal biases in the PN to KC connectivity map exist, and the effect this bias may have (if any) on the overall KC sampling of olfactory input.

Our survey of input to KC claws in the MB calyx also revealed a new cell type, MB-CP2, which likely provides recurrent and multimodal input to a small fraction of KCs in the main calyx. Even in well-described brain regions, it is not uncommon for new cell types to be discovered by EM (Helmstaedter et al., 2013; Takemura et al., 2017a), or by LM in combination with increased coverage of genetic driver lines (Aso et al., 2014). The finding of a new input cell type to KC

claws is also consistent with the “projection neurons innervating unknown regions of the brain” occasionally seen by Caron et al. (2013); see their Supplementary Table 1. Development of a split-GAL4 driver line for MB-CP2 would facilitate characterization of this neuron’s role in MB circuitry.

There is extensive recurrent microcircuitry between neurites within the MB calyx (Butcher et al., 2012), but the cell type identity of participating neurons has been elusive. We traced neurons postsynaptic to KC dendrites to identify their cell types, setting the stage for future interrogation of these fine-scale interactions by complementary high-resolution physiological and anatomical methods. We discovered that KC dendrites predominantly target a sparse subset of available cell types, including the wide-field inhibitory neuron APL, other KCs, the MBON MB-CP1, and MB-C1, an inhibitory neuron that innervates calyx and lateral horn. Interestingly,  $\alpha\beta'$  KC dendrites are even more selective, targeting only the APL and other KCs. This may be related to their specific role in memory and learning; unlike other KC subtypes,  $\alpha\beta'$  KCs are dispensable for memory retrieval (Krashes et al., 2007). Recurrent, fine-scale microcircuitry seems to be a general feature of the fly neuropil (Meinertzhagen and O’Neil, 1991; Schurmann, 2016; Takemura et al., 2017a; our unpublished observations), and identification of participating cell types will be an important initial step toward understanding microcircuit operation in many areas of the brain.

*Drosophila* exhibits a wide range of complex sensory- and memory-guided behaviors, including visual place learning, tactile-guided sequential grooming, olfactory-memory-guided courtship, escape, and vision-guided flight. The algorithms underlying behavior are implemented by neuronal circuits, and neuronal circuits are defined in large part (though certainly not entirely; Bargmann and Marder, 2013) by the synaptic connectivity between neurons. The connectome therefore is necessary to Marr’s (1982) implementation-level of analysis, and may aid in the

inference of underlying algorithms as well. The dataset we share here will help establish a structural scaffold for models of circuit function in the fly.

## Figure and Table Legends

**Figure 1. Target Volume and EM Acquisition Infrastructure. See also Figure S1, Figure S2, Figure S3, Movie S1, Movie S2, Movie S3.**

(A) Oblique view of a surface model of the *Drosophila* brain (gray mesh) with specific neuropils highlighted: antennal lobe (orange); mushroom body (pink); lateral horn (turquoise).

(B) Schematic of olfactory pathway. Projection neurons (PNs) originate from antennal lobe and their axons pass through the MB calyx, forming *en passant* synapses with MB output neurons (MBONs), before terminating in the LH.

(C) Left, schematic of TEMCA2 vacuum extension, scintillator, and camera array. Right, camera field of views (FOVs) diagram, indicating the non-overlapping FOV of each camera on scintillator.

(D) FEI CompuStage-compatible single-axis Fast Stage.

(E) Fast Stage grid holder.

(F) Custom-etched 2x1mm slot grid with fiducial marks, 2-D barcodes, and unique serial identifier.

(G) Cassette, magazines, and four-axis stage inside the Autoloader vacuum.

(H) Autoloader cassettes and magazines.

(I) Grid holder and end-effector of Autoloader grid positioning system (GPS). Arrows: prism and LED assembly (red); sample grid (black); lever of the grip assembly which actuates grid release when retracted against its stop on the stage housing (white).

(J) Autoloader end-effector

(K) Four-axis Autoloader stage. Arrows: grid positioning system (GPS) chamber (blue); view port (red); cassette shuttle chamber (black); end effector and miniature camera (white). (L) Rotational aligner integrated into the Autoloader cassette shuttle.

(L) Rotational aligner integrated into the Autoloader cassette shuttle.

**Figure 2. Reconstructed Image Volume. See also Figure S4, Figure S5, Figure S6.**

(A-F) Renderings of brain-spanning EM in the sectioning plane (x-y axes) at successive zoom levels. All panels rendered using the ELM viewer (Methods), which averages several adjacent sections to improve contrast at low magnifications. Red dotted lines in left column indicate orthogonal (y-z axes) section plane through the brain volume, rendered in right column. “D-V” and “A-P” indicate the dorso-ventral and anterior-posterior axes, respectively.

(G) Image S/N versus acquisition speed for the current dataset and several publicly downloadable volume EM data sets acquired via different techniques (Table S3). Acquisition speed is in logarithmic scale. We assume all methods are shot-noise limited; for comparison purposes signal-to-noise values have therefore been normalized to the TEMCA2 voxel size (4x4x40 nm) by the square root of the source data’s voxel size (Methods).

(H-K) Serial thin sections succeeding the one in F. Fine processes can be followed across serial sections and section-to-section image registration is accurate enough to provide a consistent field of view.

474 Scale bars: 200  $\mu\text{m}$  in (A), 100  $\mu\text{m}$  in (B); 25  $\mu\text{m}$  in (C); 10  $\mu\text{m}$  in (D); 2  $\mu\text{m}$  in (E); 0.4  $\mu\text{m}$  in (F,  
475 H-K).

476

477 **Figure 3. Validation of Tracing by EM-LM Registration and NBLAST-based Geometry**  
478 **Matching.**

479 (A-D) ELM can be used to define a three-dimensional warp field between the EM data set and a  
480 light-level template brain such that EM-imaged and LM-imaged brains are in a common  
481 template space. Same oblique cut plane shown in A-D.

482 (A) Oblique cut plane through the EM volume contains the AL and mALT (orange) that project  
483 from AL to MB calyx (red), and LH (green).

484 (B) The LM template brain immunofluorescently labeled with synapse-specific nc82 (magenta).  
485 The mALT is devoid of synapse-labeling.

486 (C) LM data of a subset of PNs labeled with random fluorophore combinations using FLP-out  
487 technique.

488 (D) Overlay of A-C. All LM datasets that have been aligned to the template brain can be  
489 projected onto the EM dataset.

490 (E) An EM-traced putative VM2 PN (black skeleton), projected to a template brain (gray surface  
491 mesh) using the inverse of the transformation previously defined to align the template brain to  
492 the EM dataset in B.

493 (F) Top hit resulting from an NBLAST search of the FlyCircuit database using the EM-traced PN  
494 (red) as a query structure. The annotated class in the VFB database is VM2.

495 (G) Overlay of the EM and LM PNs shows great structural similarity.

496 Scale bars: ~100  $\mu$ m in (A-D), ~50  $\mu$ m in (E-G).

497

498 **Figure 4. Survey of Olfactory PNs Providing Driving Input to Microglomeruli in the Main**  
 499 **MB Calyx Agrees with LM Data. See also Table S1.**

500 (A) Frontal view of olfactory PNs on the right hemisphere. A majority of PNs extend dendrites  
 501 into glomeruli in antennal lobe (AL) while their axons pass through calyx, forming *en passant*  
 502 synapses with KCs, and terminate in lateral horn (LH). A few project directly to the LH via the  
 503 mIALT.

504 (B) Frontal view of reconstructed PN skeletons (upper panel) and glomerular surface models  
 505 (lower panel) in AL.

506 (C) Concentric organizations revealed in frontal-dorsal view of PN boutons in calyx.  
 507 Reconstructed bouton skeletons (upper panel) and 2D projection (lower panel) of a bouton  
 508 surface rendering, integrated on the Z (anterior-posterior) axis for each of 3 groups respectively.  
 509 PNs from DM1, VA4, VC1, VM2 (green); DL1 and VA6 (blue); DA1, DC3, and VA1d (red).

510 (D) Dendrogram produced by hierarchical clustering of uniglomerular olfactory PNs based on  
 511 morphological similarity described by NBLAST.

512 (E) Comparison of number of PNs per glomerulus in the EM data, versus those in Grabe et al.  
 513 (2015).

514 Colors: (A-B, D) PN colors represent sensillum type (see legend in A) for their corresponding  
 515 olfactory receptor neuron (ORN) class. Color code is the same as in Couto et al. (2005) Figure  
 516 4A.

517 Abbreviations: LB, large basiconic; TB, thin basiconic; SB, small basiconic; T1, T2, T3, trichoid  
 518 sensilla; PB, maxillary palp basiconic, AC, antennal coeloconic; AI, antennal intermediate.

519 Scale bars: ~10  $\mu$ m in (A-C).

520

521 **Figure 5. PN Arbors in Calyx Cluster More Tightly Than Previously Seen with LM Across**  
 522 **Individuals. See also Figure S7.**

523 (A) Comparisons of PN tracings in EM and LM. Left column shows entire PNs with right calyx  
 524 neuropil in gray. Middle and right columns show EM and LM PN skeletons, respectively, in  
 525 calyx.

526 (B) Pair-wise mean nearest distance for homotypic PN calyx collaterals. Glomeruli are ordered  
 527 by the difference of mean distances between EM and LM PNs. Each data point represents the  
 528 mean of nearest distance between the calyx collaterals of a pair of PNs from the same  
 529 glomerulus. The same number of LM PNs as EM PNs is sampled from the existing database of  
 530 LM neurons (Costa et al., 2016; Jefferis et al., 2007). Only glomeruli innervated by two or more  
 531 PNs in the EM data are shown.

532 (C) Histogram of all data points in (B). The total average distance for all EM PN pairs was  
 533 significantly shorter than that for all LM PN pairs ( $3.53 \pm 1.63 \mu$ m versus  $5.53 \pm 2.65 \mu$ m, t test  
 534 p-value  $1.3e-12$ ).

535 Scale Bars: ~20  $\mu$ m in (A) left column; ~10  $\mu$ m in (A), middle and right columns.

536

537 **Figure 6. MB-CP2, a New Cell Type Providing Microglomerular Input to KC Claws.**

538 (A) 3D rendering of this neuron in both hemispheres with LM meshes of whole brain (gray) and  
 539 MB (green).

540 (B-E) TEM of synapses between MB-CP2 and KCs. MB-CP2 processes (orange); confirmed  
541 KC processes (green).

542 (B-C) Example synapses of MB-CP2 postsynaptic to yKCs in pedunculus, right and left  
543 hemispheres, respectively.

544 (E-F) Example synapses of MB-CP2 microglomerular organization in the main calyx, right and  
545 left hemispheres, respectively.

546 (G) Summary schematic of MB-CP2 input and output brain regions with synaptic counts  
547 discovered thus far. This neuron innervates 10 distinct neuropils. Abbreviations: Ped,  
548 pedunculus; LH, lateral horn; dAC, dorsal accessory calyx; SC, superior clamp; PLP, posterior  
549 lateral protocerebrum; SMP, superior medial protocerebrum; SIP, superior intermediate  
550 protocerebrum; SLP, superior lateral protocerebrum.

551 Scale Bars: 100  $\mu\text{m}$  in (A), dorsal view; 500  $\mu\text{m}$  in (B-C); 2  $\mu\text{m}$  in (D-E).

552

553 **Figure 7. KC Presynaptic Release Sites in the MB Main Calyx Mostly Target a Small**  
554 **Subset of Available Partners.**

555 (A-D) Morphological comparison of LM data (left) and EM-reconstructed skeletons (right) for the  
556 same classes of neurons.

557 (A)  $\alpha\beta\text{c-}$  (green),  $\alpha\beta\text{s-}$  (yellow), and  $\gamma\text{-}$  (cyan, blue) KCs. LM data shows the entire population for  
558 these three KC classes. EM data shows one KC of each of the three classes. Inset location  
559 indicated by the smaller red box. Inset shows the dendritic arm and claw of the  $\gamma$  KC that is  
560 presynaptic in (E). Black arrowhead indicates the location of the synapse in (E). Note the  
561 synapse is outside of the KC claw.

562 (B) The APL neuron.

563 (C) The MB- CP1 output neuron.

564 (D) The MB-C1 putatively GABAergic interneuron. Inset location indicated by the smaller red  
565 box. Inset shows the dendritic arm and claw of the  $\gamma$  KC that is presynaptic in F. This KC is not  
566 shown in D for visual clarity. Black arrowhead indicates the location of the synapse in F. Note  
567 the synapse is outside of the KC claw.

568 (E-F) TEM micrographs of KC divergent polyadic presynaptic release sites in the MB main  
569 calyx. White arrowheads indicate visible presynaptic release sites. In general the same color  
570 code is used to indicate same classes of neurons between (A-D) and (E-F). Black arrowhead  
571 (A) points to the same location in the 3D skeleton as white arrowhead points to in EM  
572 micrograph (E); same is true for black arrowhead in (D) and white arrowhead in (F).

573 (E) The  $\gamma$  KC from A inset (blue) and two other  $\gamma$  KCs (light purple and dark purple, presynaptic  
574 release sites not visible in this section) are convergently presynaptic to the APL (green), the MB-  
575 CP1 (red), and each other at the same synaptic cleft. The APL is presynaptic to a PN (orange)  
576 in this section plane.

577 (F) The  $\gamma$  KC from D inset (blue) is presynaptic via a divergent polyad to MB-C1 (pink), and the  
578 APL (green) two sections away (not visible in this section), and several additional unidentified  
579 partners.

580 Scale Bars: ~25  $\mu$ m in (A-D), 1  $\mu$ m in (E-F).

581

## 582 **Author Contributions**

583 Conceptualization, D.D.B., R.D.F., J.S.L., Z.Z.; Methodology, D.D.B., R.D.F., J.S.L., D.M., J.P.,  
584 C.G.R., O.T., Z.Z.; Software, J.B., P.H., G.S.X.E.J., B.K., K.K., M.K., M.N., D.M., E.P., E.T.T.,  
585 O.T., S.S.; Validation, J.S.L.; Formal Analysis, D.D.B., G.S.X.E.J., J.S.L., M.N., Z.Z.;

Investigation, I.J.A., D.D.B., S.A.C-S., C.B.F., L.K., J.S.L., C.G.R., N.S., Z.Z. ; Data Curation, J.B., R.D.F., J.S.L., D.M., M.N., E.P., C.G.R., S.S., Z.Z.; Writing – Original Draft, D.D.B., J.S.L., M.N., E.P., C.G.R., Z.Z; Writing – Review and Editing, D.D.B., G.S.X.E.J., B.K., N.S., J.S.L., Z.Z.; Visualization, D.D.B., S.A.C-S., J.S.L., Z.Z.; Supervision, D.D.B., J.S.L.; Project Administration, D.D.B.; Funding Acquisition, D.D.B.

591

592

593

## 594 **Acknowledgements**

595 Jeff Jordan, Bruce Bowers, and Jon Arnold (Janelia Instrumentation Design & Fabrication  
596 team); Dana Dunkelberger (Grant Scientific); Jim Mancuso (AMT Imaging): hardware design &  
597 engineering services. Brett Mensh, Scott Waddell, and Vivek Jayaraman: critical improvements  
598 to the manuscript. Wei-Ping Li (Janelia EM Facility): coating of sample grids and poststaining of  
599 serial sections. Najla Masoodpanah, Joseph Hsu, Benjamin Gorko, Emily Moore, Arynne Boyes,  
600 Jacob Ratliff, Adam John, Bailey Harrison, Adeleso Adesina, and Claire Managan: neuron  
601 tracing. Noah Nelson: graph visualization tools. Arlo Sheridan and Ben Gorko: 3D animations.  
602 Philipp Ranft and Gaia Tavosanis: literature review of cell types innervating MB calyx. Adam  
603 Heath, Marta Costa, and Philip Schlegel: glomerulus meshes, NBLAST analyses, and PN  
604 classification. David Peale: optimization of carbon coating and film casting protocol. Jon Arnold:  
605 technical figures. Tom Kazimiers and Andrew Champion: CATMAID development. Albert  
606 Cardona: CATMAID workflow advice, CATMAID development, and helpful discussions. Casey  
607 Schneider-Mizel: analysis code and helpful discussions. Tom Dolafi, Cristian Goina (Janelia  
608 Software Engineering): volume reconstruction support. Rob Lines, Ken Carlisle, Goran Ceric  
609 (Janelia Scientific Computing Systems): data and cluster management. Yoshinori Aso: KC and

pre-publication MCFO PN LM data. Eyal Gruntman: helpful discussions. Howard Hughes Medical Institute: funding support for all aspects of this work. Wellcome Trust: collaborative award 203261/Z/16/Z for funding additional tracing effort. Competing interests: D.D.B., J.P. (patent holders).

## References

- Arganda-Carreras, I., Kaynig, V., Rueden, C., Eliceiri, K.W., Schindelin, J., Cardona, A., and Seung, H.S. (2017). Trainable Weka Segmentation: a machine learning tool for microscopy pixel classification. *Bioinformatics* *btx180*.
- Aso, Y., Hattori, D., Yu, Y., Johnston, R.M., Iyer, N.A., Ngo, T.T., Dionne, H., Abbott, L.F., Axel, R., Tanimoto, H., *et al.* (2014). The neuronal architecture of the mushroom body provides a logic for associative learning. *eLife* *3*, e04577.
- Aso, Y., Herb, A., Ogueta, M., Siwanowicz, I., Templier, T., Friedrich, A.B., Ito, K., Scholz, H., and Tanimoto, H. (2012). Three dopamine pathways induce aversive odor memories with different stability. *PLoS Genet* *8*, e1002768.
- Bargmann, C.I., and Marder, E. (2013). From the connectome to brain function. *Nat Methods* *10*, 483-490.
- Bay, H., Ess, A., Tuytelaars, T., and Van Gool, L. (2008). Speeded-up robust features (SURF). *Computer vision and image understanding* *110*, 346-359.
- Beier, T., Pape, C., Rahaman, N., Prange, T., Berg, S., Bock, D.D., Cardona, A., Knott, G.W., Plaza, S.M., Scheffer, L.K., *et al.* (2017). Multicut brings automated neurite segmentation closer to human performance. *Nat Methods* *14*, 101-102.
- Bock, D.D., Lee, W.C., Kerlin, A.M., Andermann, M.L., Hood, G., Wetzel, A.W., Yurgenson, S., Soucy, E.R., Kim, H.S., and Reid, R.C. (2011). Network anatomy and in vivo physiology of visual cortical neurons. *Nature* *471*, 177-182.
- Bogovic, J.A., Hanslovsky, P., Wong, A., and Saalfeld, S. (2016). Robust registration of calcium images by learned contrast synthesis. Paper presented at: Biomedical Imaging (ISBI), 2016 IEEE 13th International Symposium on (IEEE).
- Braitenberg, V., and Schüz, A. (1998). *Cortex : statistics and geometry of neuronal connectivity*, 2nd thoroughly rev. edn (Berlin; New York, Springer).
- Bresenham, J.E. (1965). Algorithm for computer control of a digital plotter. *IBM Systems journal* *4*, 25-30.
- Briggman, K.L., and Bock, D.D. (2012). Volume electron microscopy for neuronal circuit reconstruction. *Curr Opin Neurobiol* *22*, 154-161.
- Briggman, K.L., Helmstaedter, M., and Denk, W. (2011). Wiring specificity in the direction-selectivity circuit of the retina. *Nature* *471*, 183-188.
- Burke, C.J., Huetteroth, W., Oswald, D., Perisse, E., Krashes, M.J., Das, G., Gohl, D., Silies, M., Certel, S., and Waddell, S. (2012). Layered reward signalling through octopamine and dopamine in *Drosophila*. *Nature* *492*, 433-437.
- Busch, S., Selcho, M., Ito, K., and Tanimoto, H. (2009). A map of octopaminergic neurons in the *Drosophila* brain. *J Comp Neurol* *513*, 643-667.

Butcher, N.J., Friedrich, A.B., Lu, Z., Tanimoto, H., and Meinertzhagen, I.A. (2012). Different classes of input and output neurons reveal new features in microglomeruli of the adult *Drosophila* mushroom body calyx. *J Comp Neurol* 520, 2185-2201.

Calonder, M., Lepetit, V., Strecha, C., and Fua, P. (2010). Brief: Binary robust independent elementary features. Paper presented at: European Conference on Computer Vision (Springer).

Cardona, A., Saalfeld, S., Schindelin, J., Arganda-Carreras, I., Preibisch, S., Longair, M., Tomancak, P., Hartenstein, V., and Douglas, R.J. (2012). TrakEM2 software for neural circuit reconstruction. *PLoS One* 7, e38011.

Caron, S.J., Ruta, V., Abbott, L.F., and Axel, R. (2013). Random convergence of olfactory inputs in the *Drosophila* mushroom body. *Nature* 497, 113-117.

Chen, C.C., Wu, J.K., Lin, H.W., Pai, T.P., Fu, T.F., Wu, C.L., Tully, T., and Chiang, A.S. (2012). Visualizing long-term memory formation in two neurons of the *Drosophila* brain. *Science* 335, 678-685.

Chiang, A.S., Lin, C.Y., Chuang, C.C., Chang, H.M., Hsieh, C.H., Yeh, C.W., Shih, C.T., Wu, J.J., Wang, G.T., Chen, Y.C., *et al.* (2011). Three-dimensional reconstruction of brain-wide wiring networks in *Drosophila* at single-cell resolution. *Curr Biol* 21, 1-11.

Christiansen, F., Zube, C., Andlauer, T.F., Wichmann, C., Fouquet, W., Oswald, D., Mertel, S., Leiss, F., Tavoisanis, G., Luna, A.J., *et al.* (2011). Presynapses in Kenyon cell dendrites in the mushroom body calyx of *Drosophila*. *J Neurosci* 31, 9696-9707.

Costa, M., Manton, J.D., Ostrovsky, A.D., Prohaska, S., and Jefferis, G.S. (2016). NBLAST: Rapid, Sensitive Comparison of Neuronal Structure and Construction of Neuron Family Databases. *Neuron* 91, 293-311.

Couto, A., Alenius, M., and Dickson, B.J. (2005). Molecular, anatomical, and functional organization of the *Drosophila* olfactory system. *Curr Biol* 15, 1535-1547.

Davis, R.L. (2011). Traces of *Drosophila* memory. *Neuron* 70, 8-19.

De Bruijn, W., Memelink, A., and Riemersma, J. (1984). Cellular membrane contrast and contrast differentiation with osmium triazole and tetrazole complexes. *The Histochemical Journal* 16, 37-50.

de Haro, M., Al-Ramahi, I., Benito-Sipos, J., Lopez-Arias, B., Dorado, B., Veenstra, J.A., and Herrero, P. (2010). Detailed analysis of leucokinin-expressing neurons and their candidate functions in the *Drosophila* nervous system. *Cell Tissue Res* 339, 321-336.

Denk, W., and Horstmann, H. (2004). Serial block-face scanning electron microscopy to reconstruct three-dimensional tissue nanostructure. *PLoS Biol* 2, e329.

Eberle, A.L., Mikula, S., Schalek, R., Lichtman, J., Knothe Tate, M.L., and Zeidler, D. (2015). High-resolution, high-throughput imaging with a multibeam scanning electron microscope. *J Microsc* 259, 114-120.

Erdogmus, D., Larsson, E.G., Yan, R., Principe, J.C., and Fitzsimmons, J.R. (2004). Measuring the signal-to-noise ratio in magnetic resonance imaging: a caveat. *Signal processing* 84, 1035-1040.

Fischler, M.A., and Bolles, R.C. (1981). Random sample consensus: a paradigm for model fitting with applications to image analysis and automated cartography. *Communications of the ACM* 24, 381-395.

Frank, D.D., Jouandet, G.C., Kearney, P.J., Macpherson, L.J., and Gallio, M. (2015). Temperature representation in the *Drosophila* brain. *Nature* 519, 358-361.

Funke, J., Saalfeld, S., Bock, D.D., Turaga, S.C., and Perlman, E. (2016). MICCAI Challenge on Circuit Reconstruction from Electron Microscopy Images (CREMI).

Grabe, V., Strutz, A., Baschwitz, A., Hansson, B.S., and Sachse, S. (2015). Digital in vivo 3D atlas of the antennal lobe of *Drosophila melanogaster*. *J Comp Neurol* 523, 530-544.

Gruntman, E., and Turner, G.C. (2013). Integration of the olfactory code across dendritic claws of single mushroom body neurons. *Nat Neurosci* 16, 1821-1829.

Hamos, J.E., Van Horn, S.C., Raczkowski, D., and Sherman, S.M. (1987). Synaptic circuits involving an individual retinogeniculate axon in the cat. *J Comp Neurol* 259, 165-192.

Hampel, S., Franconville, R., Simpson, J.H., and Seeds, A.M. (2015). A neural command circuit for grooming movement control. *eLife* 4, e08758.

Hanslovsky, P., Bogovic, J.A., and Saalfeld, S. (2017). Image-based correction of continuous and discontinuous non-planar axial distortion in serial section microscopy. *Bioinformatics* 33, 1379-1386.

Harris, K.M., Perry, E., Bourne, J., Feinberg, M., Ostroff, L., and Hurlburt, J. (2006). Uniform serial sectioning for transmission electron microscopy. *J Neurosci* 26, 12101-12103.

Heimbeck, G., Bugnon, V., Gendre, N., Keller, A., and Stocker, R.F. (2001). A central neural circuit for experience-independent olfactory and courtship behavior in *Drosophila melanogaster*. *Proc Natl Acad Sci U S A* 98, 15336-15341.

Heisenberg, M. (2003). Mushroom body memoir: from maps to models. *Nat Rev Neurosci* 4, 266-275.

Heisenberg, M., and Wolf, R. (1984). *Vision in Drosophila : genetics of microbehavior* (Berlin ; New York, Springer-Verlag).

Helmstaedter, M. (2013). Cellular-resolution connectomics: challenges of dense neural circuit reconstruction. *Nat Methods* 10, 501-507.

Helmstaedter, M., Briggman, K.L., and Denk, W. (2008). 3D structural imaging of the brain with photons and electrons. *Curr Opin Neurobiol* 18, 633-641.

Helmstaedter, M., Briggman, K.L., Turaga, S.C., Jain, V., Seung, H.S., and Denk, W. (2013). Connectomic reconstruction of the inner plexiform layer in the mouse retina. *Nature* 500, 168-174.

Hige, T., Aso, Y., Rubin, G.M., and Turner, G.C. (2015). Plasticity-driven individualization of olfactory coding in mushroom body output neurons. *Nature* 526, 258-262.

Hildebrand, D.G.C., Cicconet, M., Torres, R.M., Choi, W., Quan, T.M., Moon, J., Wetzels, A.W., Scott, A., Graham, B.J., Randler, O., *et al.* (2017). Whole-brain serial-section electron microscopy in larval zebrafish. *Nature* 545, 345-349.

Hiraoka, J.I. (1972). A holder for mass treatment of grids, adapted especially to electron staining and autoradiography. *Stain Technol* 47, 297-301.

Hoopfer, E.D. (2016). Neural control of aggression in *Drosophila*. *Curr Opin Neurobiol* 38, 109-118.

Ito, K., Shinomiya, K., Ito, M., Armstrong, J.D., Boyan, G., Hartenstein, V., Harzsch, S., Heisenberg, M., Homberg, U., Jenett, A., *et al.* (2014). A systematic nomenclature for the insect brain. *Neuron* 81, 755-765.

Januszewski, M., Maitin-Shepard, J., Li, P., Kornfeld, J., Denk, W., and Jain, V. (2016). Flood-Filling Networks. *arXiv preprint arXiv:161100421*.

Jefferis, G.S., Potter, C.J., Chan, A.M., Marin, E.C., Rohlfs, T., Maurer, C.R., Jr., and Luo, L. (2007). Comprehensive maps of *Drosophila* higher olfactory centers: spatially segregated fruit and pheromone representation. *Cell* 128, 1187-1203.

Jenett, A., Rubin, G.M., Ngo, T.T., Shepherd, D., Murphy, C., Dionne, H., Pfeiffer, B.D., Cavallaro, A., Hall, D., Jeter, J., *et al.* (2012). A GAL4-driver line resource for *Drosophila* neurobiology. *Cell reports* 2, 991-1001.

Jiang, H., and Sun, S.X. (2013). Cellular pressure and volume regulation and implications for cell mechanics. *Biophysical journal* 105, 609-619.

Kashif, M., Deserno, T.M., Haak, D., and Jonas, S. (2016). Feature description with SIFT, SURF, BRIEF, BRISK, or FREAK? A general question answered for bone age assessment. *Computers in biology and medicine* 68, 67-75.

Kasthuri, N., Hayworth, K.J., Berger, D.R., Schalek, R.L., Conchello, J.A., Knowles-Barley, S., Lee, D., Vazquez-Reina, A., Kaynig, V., Jones, T.R., *et al.* (2015). Saturated Reconstruction of a Volume of Neocortex. *Cell* 162, 648-661.

Kaynig, V., Fischer, B., Muller, E., and Buhmann, J.M. (2010). Fully automatic stitching and distortion correction of transmission electron microscope images. *J Struct Biol* 171, 163-173.

Kazama, H., and Wilson, R.I. (2009). Origins of correlated activity in an olfactory circuit. *Nat Neurosci* 12, 1136-1144.

749 Kazhdan, M., Surendran, D., and Hoppe, H. (2010). Distributed gradient-domain processing of planar and  
750 spherical images. *ACM Transactions on Graphics (TOG)* 29, 14.

751 Kim, A.J., Fenk, L.M., Lyu, C., and Maimon, G. (2017). Quantitative Predictions Orchestrate Visual  
752 Signaling in *Drosophila*. *Cell* 168, 280-294 e212.

753 Kirkhart, C., and Scott, K. (2015). Gustatory learning and processing in the *Drosophila* mushroom bodies.  
754 *J Neurosci* 35, 5950-5958.

755 Ko, H., Hofer, S.B., Pichler, B., Buchanan, K.A., Sjöström, P.J., and Mrsic-Flogel, T.D. (2011).  
756 Functional specificity of local synaptic connections in neocortical networks. *Nature* 473, 87-91.

757 Krashes, M.J., Keene, A.C., Leung, B., Armstrong, J.D., and Waddell, S. (2007). Sequential use of  
758 mushroom body neuron subsets during *drosophila* odor memory processing. *Neuron* 53, 103-115.

759 Kuwajima, M., Mendenhall, J.M., Lindsey, L.F., and Harris, K.M. (2013). Automated transmission-mode  
760 scanning electron microscopy (tSEM) for large volume analysis at nanoscale resolution. *PLoS One* 8,  
761 e59573.

762 Kvon, E.Z., Kazmar, T., Stampfel, G., Yanez-Cuna, J.O., Pagani, M., Schernhuber, K., Dickson, B.J., and  
763 Stark, A. (2014). Genome-scale functional characterization of *Drosophila* developmental enhancers in  
764 vivo. *Nature* 512, 91-95.

765 Lambert, T.J., and Waters, J.C. (2016). Navigating challenges in the application of superresolution  
766 microscopy. *The Journal of Cell Biology*.

767 Lauritzen, J.S., Sigulinsky, C.L., Anderson, J.R., Kalloniatis, M., Nelson, N.T., Emrich, D.P., Rapp, C.,  
768 McCarthy, N., Kerzner, E., Meyer, M., *et al.* (2016). Rod-cone crossover connectome of mammalian  
769 bipolar cells. *J Comp Neurol*.

770 Lee, W.C., Bonin, V., Reed, M., Graham, B.J., Hood, G., Glattfelder, K., and Reid, R.C. (2016). Anatomy  
771 and function of an excitatory network in the visual cortex. *Nature* 532, 370-374.

772 Lefman, J., Morrison, R., and Subramaniam, S. (2007). Automated 100-position specimen loader and  
773 image acquisition system for transmission electron microscopy. *J Struct Biol* 158, 318-326.

774 Li, D., Shao, L., Chen, B.C., Zhang, X., Zhang, M., Moses, B., Milkie, D.E., Beach, J.R., Hammer, J.A.,  
775 3rd, Pasham, M., *et al.* (2015). ADVANCED IMAGING. Extended-resolution structured illumination  
776 imaging of endocytic and cytoskeletal dynamics. *Science* 349, aab3500.

777 Lichtman, J.W., and Sanes, J.R. (2008). Ome sweet ome: what can the genome tell us about the  
778 connectome? *Curr Opin Neurobiol* 18, 346-353.

779 Lin, A.C., Bygrave, A.M., de Calignon, A., Lee, T., and Miesenböck, G. (2014). Sparse, decorrelated  
780 odor coding in the mushroom body enhances learned odor discrimination. *Nat Neurosci* 17, 559-568.

781 Lin, H.H., Lai, J.S., Chin, A.L., Chen, Y.C., and Chiang, A.S. (2007). A map of olfactory representation  
782 in the *Drosophila* mushroom body. *Cell* 128, 1205-1217.

783 Liu, C., Placais, P.Y., Yamagata, N., Pfeiffer, B.D., Aso, Y., Friedrich, A.B., Siwanowicz, I., Rubin,  
784 G.M., Preat, T., and Tanimoto, H. (2012). A subset of dopamine neurons signals reward for odour  
785 memory in *Drosophila*. *Nature* 488, 512-516.

786 Liu, X., and Davis, R.L. (2009). The GABAergic anterior paired lateral neuron suppresses and is  
787 suppressed by olfactory learning. *Nat Neurosci* 12, 53-59.

788 Lowe, D.G. (2004). Distinctive image features from scale-invariant keypoints. *International journal of*  
789 *computer vision* 60, 91-110.

790 Manton, J.D., Ostrovsky, A.D., Goetz, L., Costa, M., Rohlfing, T., and Jefferis, G.S. (2014). Combining  
791 genome-scale *Drosophila* 3D neuroanatomical data by bridging template brains. *bioRxiv*, 006353.

792 Mao, Z., and Davis, R.L. (2009). Eight different types of dopaminergic neurons innervate the *Drosophila*  
793 mushroom body neuropil: anatomical and physiological heterogeneity. *Front Neural Circuits* 3, 5.

794 Marr, D. (1969). A theory of cerebellar cortex. *J Physiol* 202, 437-470.

795 Marr, D. (1982). *Vision: A computational investigation into the human representation and processing of*  
796 *visual information*, Henry Holt and Co. Inc, New York, NY 2, 4.2.

797 McGuire, B.A., Gilbert, C.D., Rivlin, P.K., and Wiesel, T.N. (1991). Targets of horizontal connections in  
798 macaque primary visual cortex. *J Comp Neurol* 305, 370-392.

799 Meinertzhagen, I.A., and O'Neil, S.D. (1991). Synaptic organization of columnar elements in the lamina  
800 of the wild type in *Drosophila melanogaster*. *J Comp Neurol* 305, 232-263.

801 Micheva, K.D., Wolman, D., Mensh, B.D., Pax, E., Buchanan, J., Smith, S.J., and Bock, D.D. (2016). A  
802 large fraction of neocortical myelin ensheathes axons of local inhibitory neurons. *eLife* 5, e15784.

803 Milyaev, N., Osumi-Sutherland, D., Reeve, S., Burton, N., Baldock, R.A., and Armstrong, J.D. (2012).  
804 The Virtual Fly Brain browser and query interface. *Bioinformatics* 28, 411-415.

805 Morgan, J.L., Berger, D.R., Wetzel, A.W., and Lichtman, J.W. (2016). The Fuzzy Logic of Network  
806 Connectivity in Mouse Visual Thalamus. *Cell* 165, 192-206.

807 Ofstad, T.A., Zuker, C.S., and Reiser, M.B. (2011). Visual place learning in *Drosophila melanogaster*.  
808 *Nature* 474, 204-207.

809 Ohyama, T., Schneider-Mizell, C.M., Fetter, R.D., Aleman, J.V., Franconville, R., Rivera-Alba, M.,  
810 Mensh, B.D., Branson, K.M., Simpson, J.H., Truman, J.W., *et al.* (2015). A multilevel multimodal circuit  
811 enhances action selection in *Drosophila*. *Nature* 520, 633-639.

812 Olsen, S.R., Bhandawat, V., and Wilson, R.I. (2007). Excitatory interactions between olfactory processing  
813 channels in the *Drosophila* antennal lobe. *Neuron* 54, 89-103.

814 Oswald, D., Felsenberg, J., Talbot, C.B., Das, G., Perisse, E., Huetteroth, W., and Waddell, S. (2015).  
815 Activity of defined mushroom body output neurons underlies learned olfactory behavior in *Drosophila*.  
816 *Neuron* 86, 417-427.

817 Oswald, D., and Waddell, S. (2015). Olfactory learning skews mushroom body output pathways to steer  
818 behavioral choice in *Drosophila*. *Curr Opin Neurobiol* 35, 178-184.

819 Pavlou, H.J., and Goodwin, S.F. (2013). Courtship behavior in *Drosophila melanogaster*: towards a  
820 'courtship connectome'. *Curr Opin Neurobiol* 23, 76-83.

821 Perin, R., Berger, T.K., and Markram, H. (2011). A synaptic organizing principle for cortical neuronal  
822 groups. *Proc Natl Acad Sci U S A* 108, 5419-5424.

823 Pfeiffer, B.D., Ngo, T.T., Hibbard, K.L., Murphy, C., Jenett, A., Truman, J.W., and Rubin, G.M. (2010).  
824 Refinement of tools for targeted gene expression in *Drosophila*. *Genetics* 186, 735-755.

825 Pietzsch, T., Saalfeld, S., Preibisch, S., and Tomancak, P. (2015). BigDataViewer: visualization and  
826 processing for large image data sets. *Nat Methods* 12, 481-483.

827 Potter, C.S., Pulokas, J., Smith, P., Suloway, C., and Carragher, B. (2004). Robotic grid loading system  
828 for a transmission electron microscope. *J Struct Biol* 146, 431-440.

829 Prokop, A., and Meinertzhagen, I.A. (2006). Development and structure of synaptic contacts in  
830 *Drosophila*. *Semin Cell Dev Biol* 17, 20-30.

831 Robinson, C., Price, J., Milkie, D., Torrens, O., Perlman, E., Zheng, Z., Fetter, R., and Bock, D. (2016).  
832 Automated Infrastructure for High-Throughput Acquisition of Serial Section TEM Image Volumes.  
833 *Microscopy and Microanalysis* 22, 1150-1151.

834 Roy, B., Singh, A.P., Shetty, C., Chaudhary, V., North, A., Landgraf, M., Vijayraghavan, K., and  
835 Rodrigues, V. (2007). Metamorphosis of an identified serotonergic neuron in the *Drosophila* olfactory  
836 system. *Neural Dev* 2, 20.

837 Ruskin, R.S., Yu, Z., and Grigorieff, N. (2013). Quantitative characterization of electron detectors for  
838 transmission electron microscopy. *J Struct Biol* 184, 385-393.

839 Ruta, V., Datta, S.R., Vasconcelos, M.L., Freeland, J., Looger, L.L., and Axel, R. (2010). A dimorphic  
840 pheromone circuit in *Drosophila* from sensory input to descending output. *Nature* 468, 686-690.

841 Ryan, K., Lu, Z., and Meinertzhagen, I.A. (2016). The CNS connectome of a tadpole larva of *Ciona*  
842 intestinalis (L.) highlights sidedness in the brain of a chordate sibling. *eLife* 5, e16962.

843 Saalfeld, S., Fetter, R., Cardona, A., and Tomancak, P. (2012). Elastic volume reconstruction from series  
844 of ultra-thin microscopy sections. *Nat Methods* 9, 717-720.

845 Sato, T. (1968). A modified method for lead staining of thin sections. *J Electron Microsc (Tokyo)* 17,  
846 158-159.

847 Schindelin, J., Arganda-Carreras, I., Frise, E., Kaynig, V., Longair, M., Pietzsch, T., Preibisch, S.,  
848 Rueden, C., Saalfeld, S., Schmid, B., *et al.* (2012). Fiji: an open-source platform for biological-image  
849 analysis. *Nat Methods* 9, 676-682.

850 Schlegel, P., Texada, M.J., Miroshnikow, A., Schoofs, A., Huckesfeld, S., Peters, M., Schneider-Mizell,  
851 C.M., Lacin, H., Li, F., Fetter, R.D., *et al.* (2016). Synaptic transmission parallels neuromodulation in a  
852 central food-intake circuit. *eLife* 5, e16799.

853 Schneider-Mizell, C.M., Gerhard, S., Longair, M., Kazimiers, T., Li, F., Zwart, M.F., Champion, A.,  
854 Midgley, F.M., Fetter, R.D., Saalfeld, S., *et al.* (2016). Quantitative neuroanatomy for connectomics in  
855 *Drosophila*. *eLife* 5, e12059.

856 Schurmann, F.W. (2016). Fine structure of synaptic sites and circuits in mushroom bodies of insect  
857 brains. *Arthropod Struct Dev* 45, 399-421.

858 Sejourne, J., Placais, P.Y., Aso, Y., Siwanowicz, I., Trannoy, S., Thoma, V., Tedjakumala, S.R., Rubin,  
859 G.M., Tchenio, P., Ito, K., *et al.* (2011). Mushroom body efferent neurons responsible for aversive  
860 olfactory memory retrieval in *Drosophila*. *Nat Neurosci* 14, 903-910.

861 Shepherd, G.M. (2016). Foundations of the neuron doctrine, 25th anniversary edition. edn (Oxford ; New  
862 York, Oxford University Press).

863 Song, S., Sjöström, P.J., Reigl, M., Nelson, S., and Chklovskii, D.B. (2005). Highly nonrandom features  
864 of synaptic connectivity in local cortical circuits. *PLoS Biol* 3, e68.

865 Spindler, S.R., and Hartenstein, V. (2010). The *Drosophila* neural lineages: a model system to study brain  
866 development and circuitry. *Dev Genes Evol* 220, 1-10.

867 Sterling, P., and Laughlin, S. (2015). Principles of neural design (Cambridge, Massachusetts, The MIT  
868 Press).

869 Stocker, R.F., Lienhard, M.C., Borst, A., and Fischbach, K.F. (1990). Neuronal architecture of the  
870 antennal lobe in *Drosophila melanogaster*. *Cell Tissue Res* 262, 9-34.

871 Takemura, S., Aso, Y., Hige, T., Wong, A., Lu, Z., Xu, C.S., Plaza, S., Rivlin, P.K., Hess, H., Zhao, T., *et al.*  
872 (2017a). A connectome of a learning and memory center in the adult *Drosophila* brain. *eLife in press*.

873 Takemura, S.Y., Bharioke, A., Lu, Z., Nern, A., Vitaladevuni, S., Rivlin, P.K., Katz, W.T., Olbris, D.J.,  
874 Plaza, S.M., Winston, P., *et al.* (2013). A visual motion detection circuit suggested by *Drosophila*  
875 connectomics. *Nature* 500, 175-181.

876 Takemura, S.Y., Lu, Z., and Meinertzhagen, I.A. (2008). Synaptic circuits of the *Drosophila* optic lobe:  
877 the input terminals to the medulla. *J Comp Neurol* 509, 493-513.

878 Takemura, S.Y., Nern, A., Chklovskii, D.B., Scheffer, L.K., Rubin, G.M., and Meinertzhagen, I.A.  
879 (2017b). The comprehensive connectome of a neural substrate for 'ON' motion detection in *Drosophila*.  
880 *eLife* 6, e24394.

881 Takemura, S.Y., Xu, C.S., Lu, Z., Rivlin, P.K., Parag, T., Olbris, D.J., Plaza, S., Zhao, T., Katz, W.T.,  
882 Umayam, L., *et al.* (2015). Synaptic circuits and their variations within different columns in the visual  
883 system of *Drosophila*. *Proc Natl Acad Sci U S A* 112, 13711-13716.

884 Tanaka, N.K., Awasaki, T., Shimada, T., and Ito, K. (2004). Integration of chemosensory pathways in the  
885 *Drosophila* second-order olfactory centers. *Curr Biol* 14, 449-457.

886 Tanaka, N.K., Endo, K., and Ito, K. (2012). Organization of antennal lobe-associated neurons in adult  
887 *Drosophila melanogaster* brain. *J Comp Neurol* 520, 4067-4130.

888 Tanaka, N.K., Tanimoto, H., and Ito, K. (2008). Neuronal assemblies of the *Drosophila* mushroom body.  
889 *J Comp Neurol* 508, 711-755.

890 Tomassy, G.S., Berger, D.R., Chen, H.H., Kasthuri, N., Hayworth, K.J., Vercelli, A., Seung, H.S.,  
891 Lichtman, J.W., and Arlotta, P. (2014). Distinct profiles of myelin distribution along single axons of  
892 pyramidal neurons in the neocortex. *Science* 344, 319-324.

893 Tschida, K., and Bhandawat, V. (2015). Activity in descending dopaminergic neurons represents but is  
894 not required for leg movements in the fruit fly *Drosophila*. *Physiol Rep* 3.  
895 Vogt, K., Aso, Y., Hige, T., Knapek, S., Ichinose, T., Friedrich, A.B., Turner, G.C., Rubin, G.M., and  
896 Tanimoto, H. (2016). Direct neural pathways convey distinct visual information to *Drosophila* mushroom  
897 bodies. *eLife* 5, e14009.  
898 von Reyn, C.R., Breads, P., Peek, M.Y., Zheng, G.Z., Williamson, W.R., Yee, A.L., Leonardo, A., and  
899 Card, G.M. (2014). A spike-timing mechanism for action selection. *Nat Neurosci* 17, 962-970.  
900 Wanner, A.A., Genoud, C., Masudi, T., Siksou, L., and Friedrich, R.W. (2016). Dense EM-based  
901 reconstruction of the interglomerular projectome in the zebrafish olfactory bulb. *Nat Neurosci* 19, 816-  
902 825.  
903 Wertz, A., Trenholm, S., Yonehara, K., Hillier, D., Raics, Z., Leinweber, M., Szalay, G., Ghanem, A.,  
904 Keller, G., Rozsa, B., *et al.* (2015). Single-cell-initiated monosynaptic tracing reveals layer-specific  
905 cortical network modules. *Science* 349, 70-74.  
906 Wetzel, A.W., Bakal, J., Dittrich, M., Hildebrand, D.G., Morgan, J.L., and Lichtman, J.W. (2016).  
907 Registering large volume serial-section electron microscopy image sets for neural circuit reconstruction  
908 using FFT signal whitening. *arXiv preprint arXiv:161204787*.  
909 White, J.G., Southgate, E., Thomson, J.N., and Brenner, S. (1986). The structure of the nervous system of  
910 the nematode *Caenorhabditis elegans*. *Phil Trans Royal Soc London B* 314, 1-340.  
911 Wilson, R.I. (2013). Early olfactory processing in *Drosophila*: mechanisms and principles. *Annu Rev*  
912 *Neurosci* 36, 217-241.  
913 Wilson, R.I., Turner, G.C., and Laurent, G. (2004). Transformation of olfactory representations in the  
914 *Drosophila* antennal lobe. *Science* 303, 366-370.  
915 Wolff, T., Iyer, N.A., and Rubin, G.M. (2015). Neuroarchitecture and neuroanatomy of the *Drosophila*  
916 central complex: A GAL4-based dissection of protocerebral bridge neurons and circuits. *J Comp Neurol*  
917 523, 997-1037.  
918 Xu, C.S., Hayworth, K.J., Lu, Z., Grob, P., Hassan, A.M., García-Cerdán, J.G., Niyogi, K.K., Nogales, E.,  
919 Weinberg, R.J., and Hess, H.F. (2017). Enhanced FIB-SEM systems for large-volume 3D imaging. *eLife*  
920 6, e25916.  
921 Yagi, R., Mabuchi, Y., Mizunami, M., and Tanaka, N.K. (2016). Convergence of multimodal sensory  
922 pathways to the mushroom body calyx in *Drosophila melanogaster*. *Sci Rep* 6, 29481.  
923 Yasuyama, K., Meinertzhagen, I.A., and Schurmann, F.W. (2002). Synaptic organization of the  
924 mushroom body calyx in *Drosophila melanogaster*. *J Comp Neurol* 445, 211-226.  
925

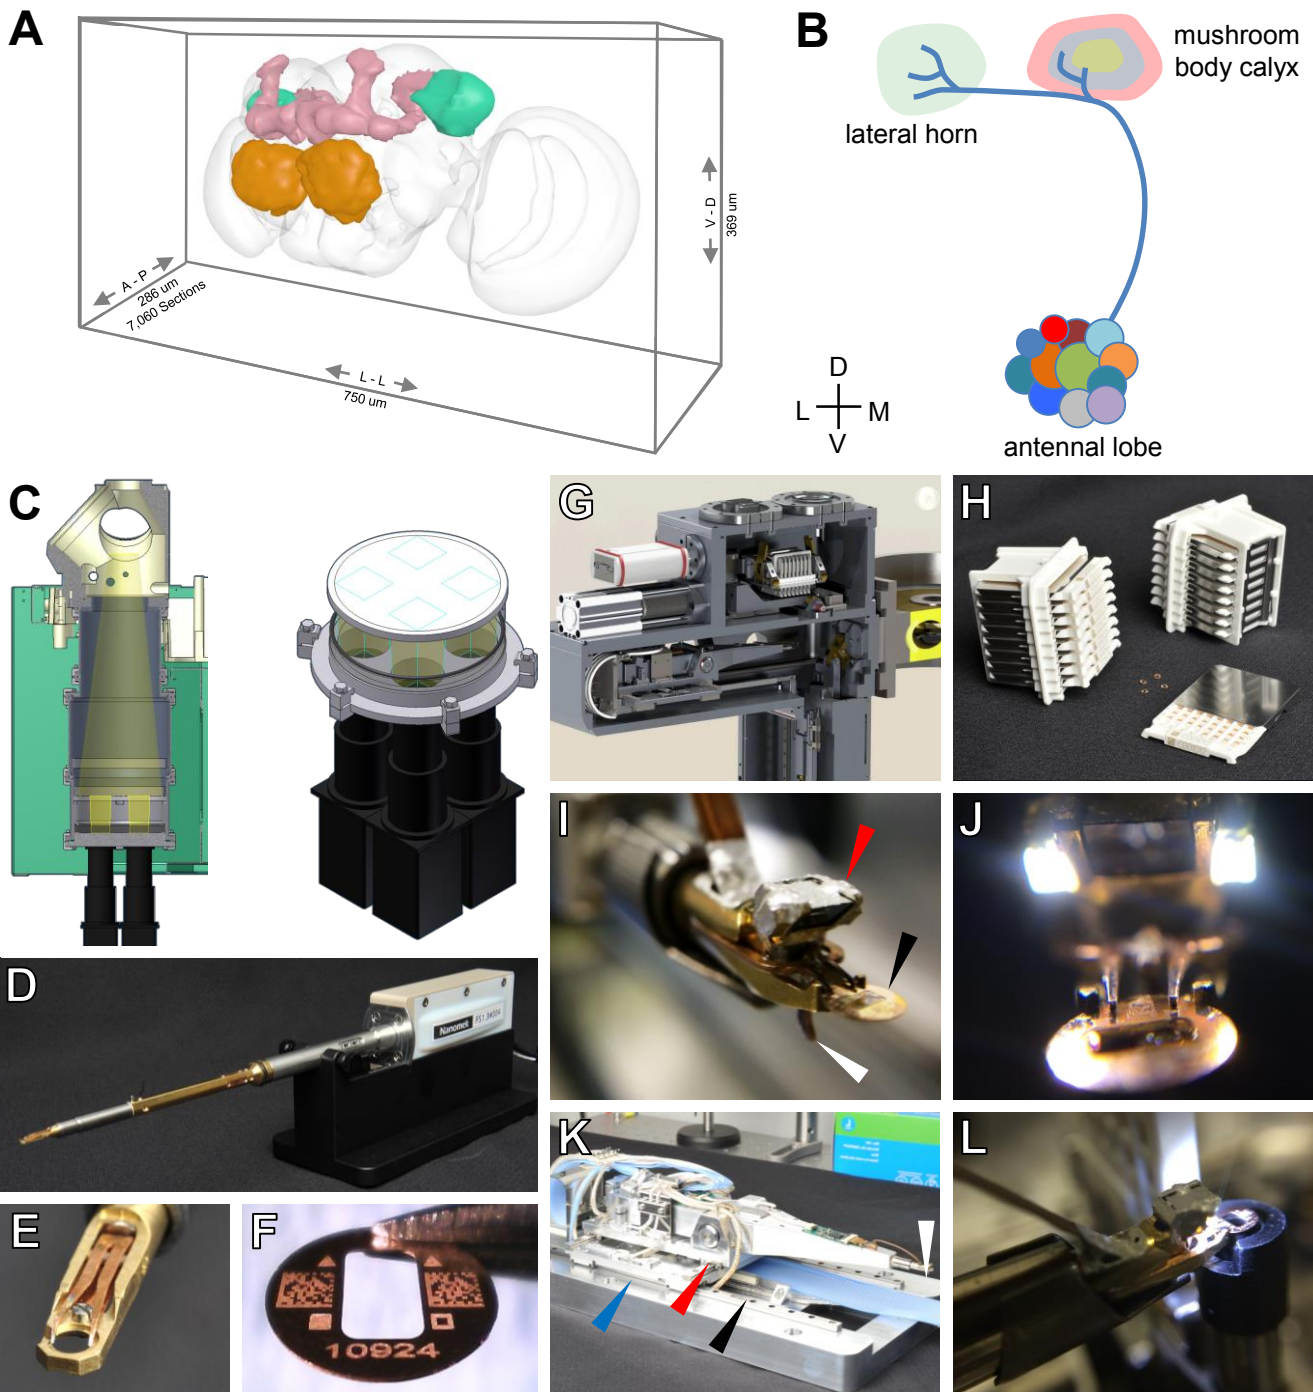

**Figure 1. Target Volume and EM Acquisition Infrastructure. See also Figure S1, Figure S2, Figure S3, Movie S1, Movie S2, Movie S3.**

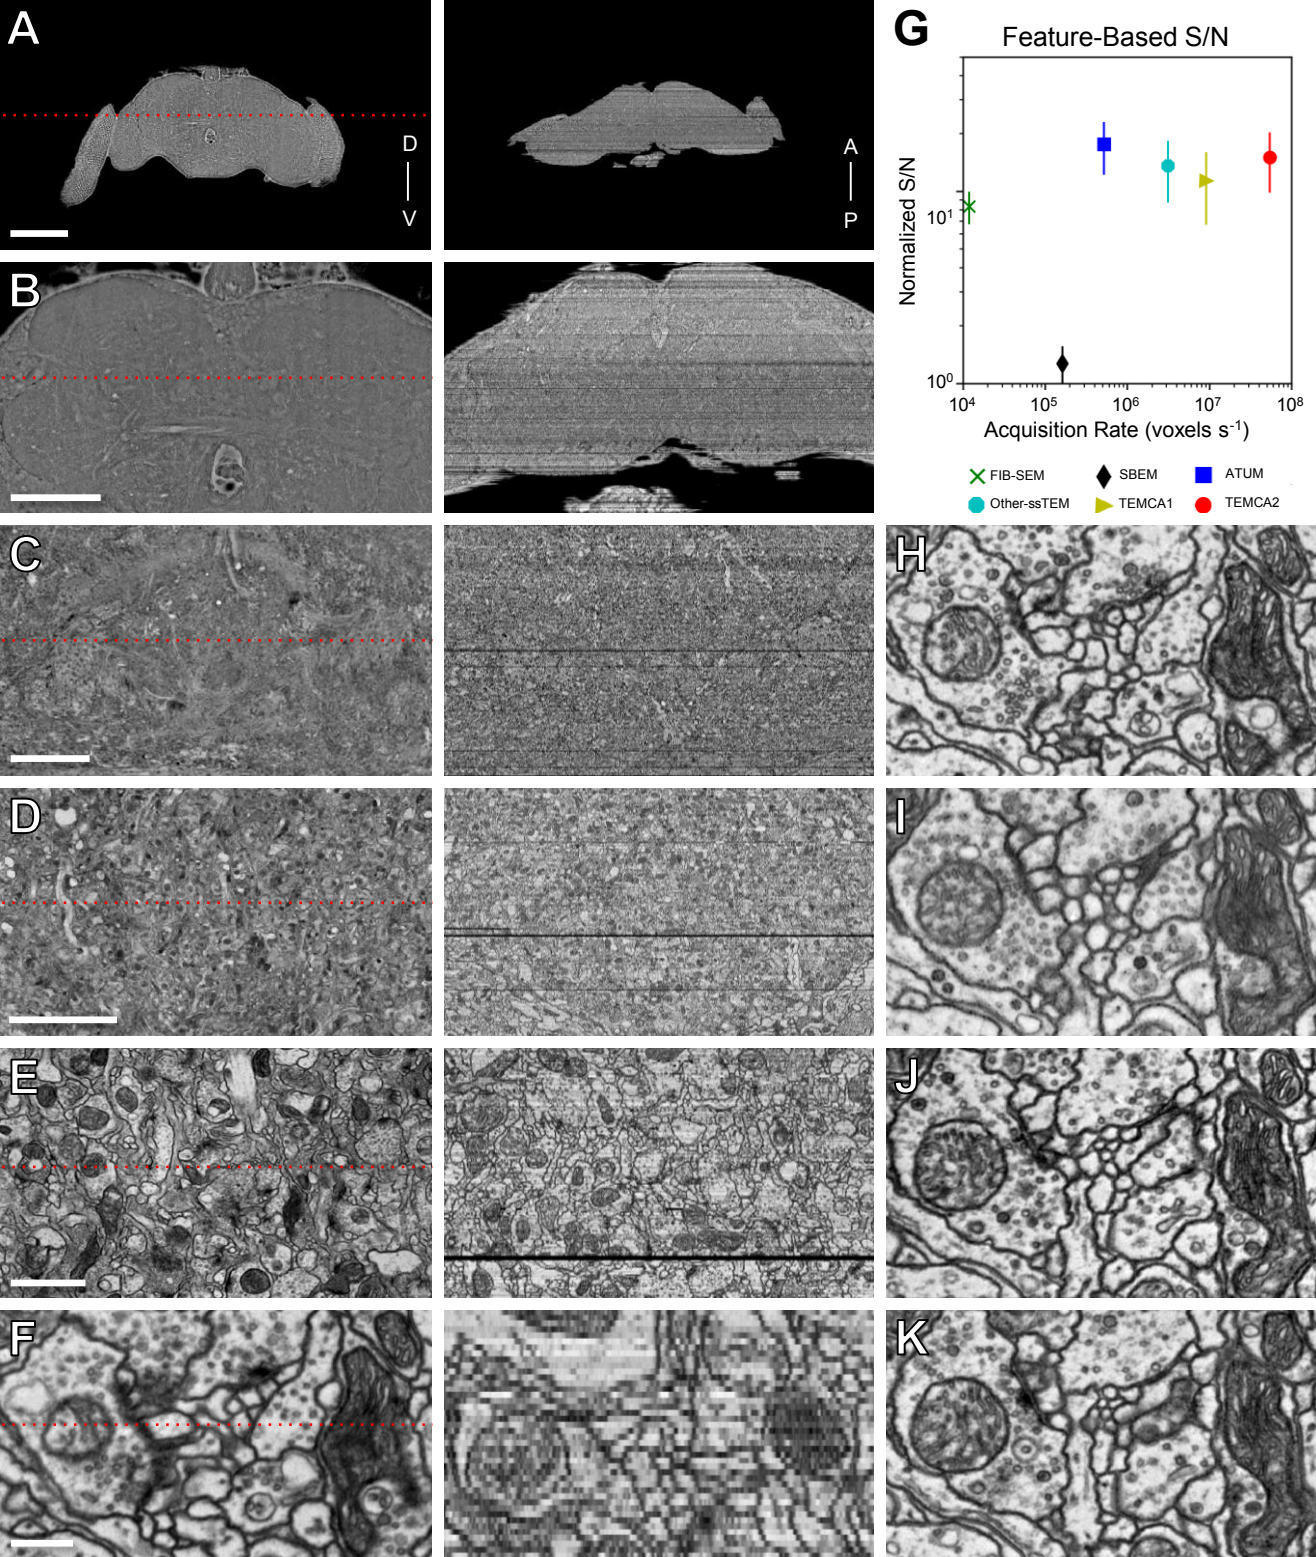

**Figure 2. Reconstructed Image Volume. See also Figure S4, Figure S5, Figure S6.**

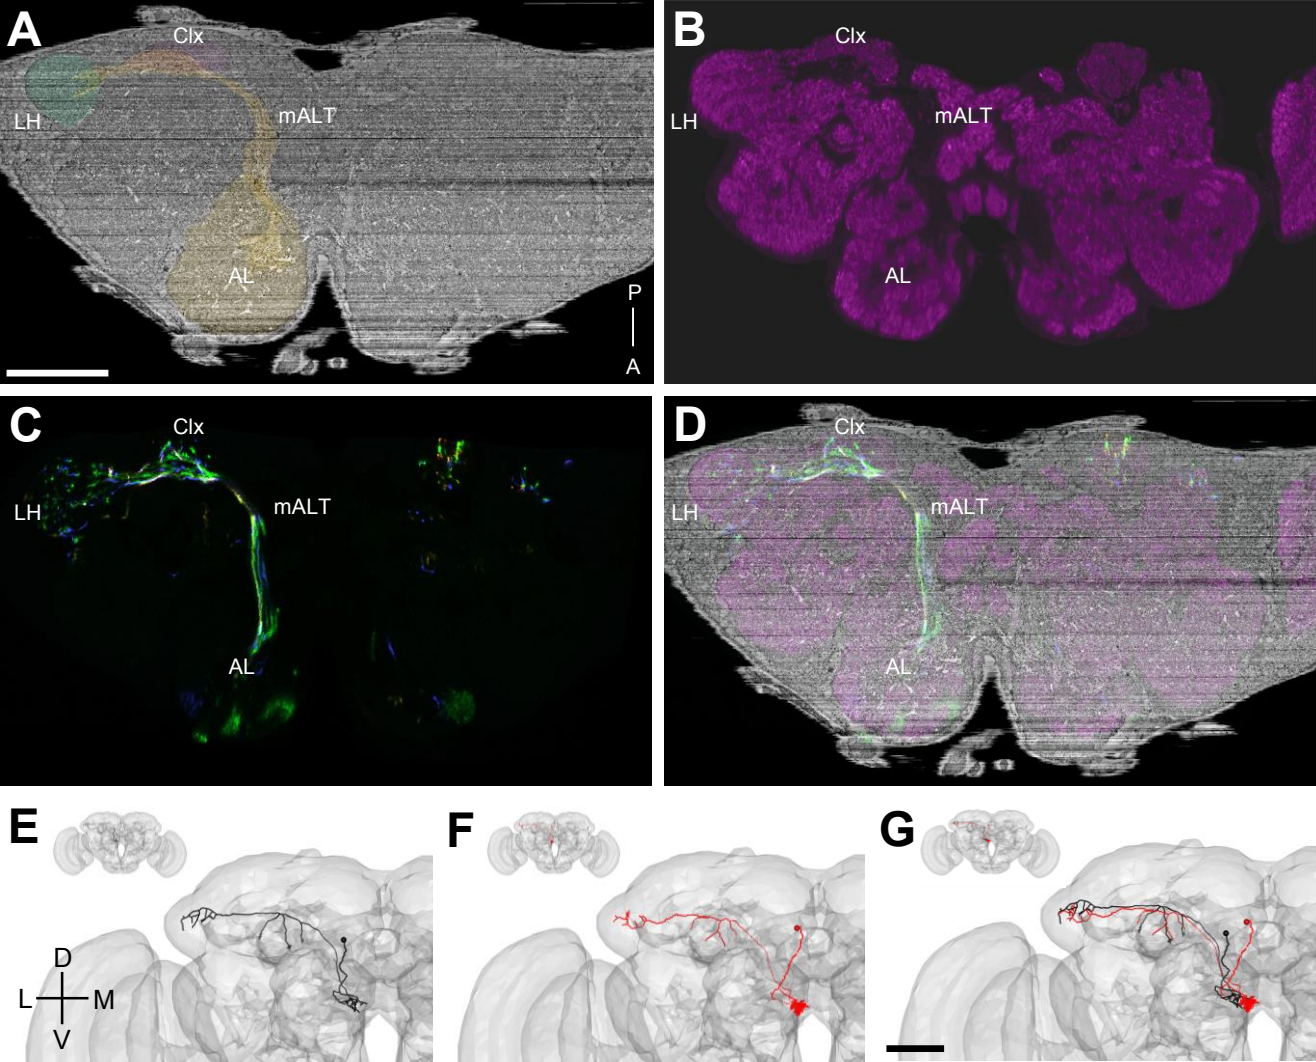

**Figure 3. Validation of Tracing by EM-LM Registration and NBLAST-based Geometry Matching.**

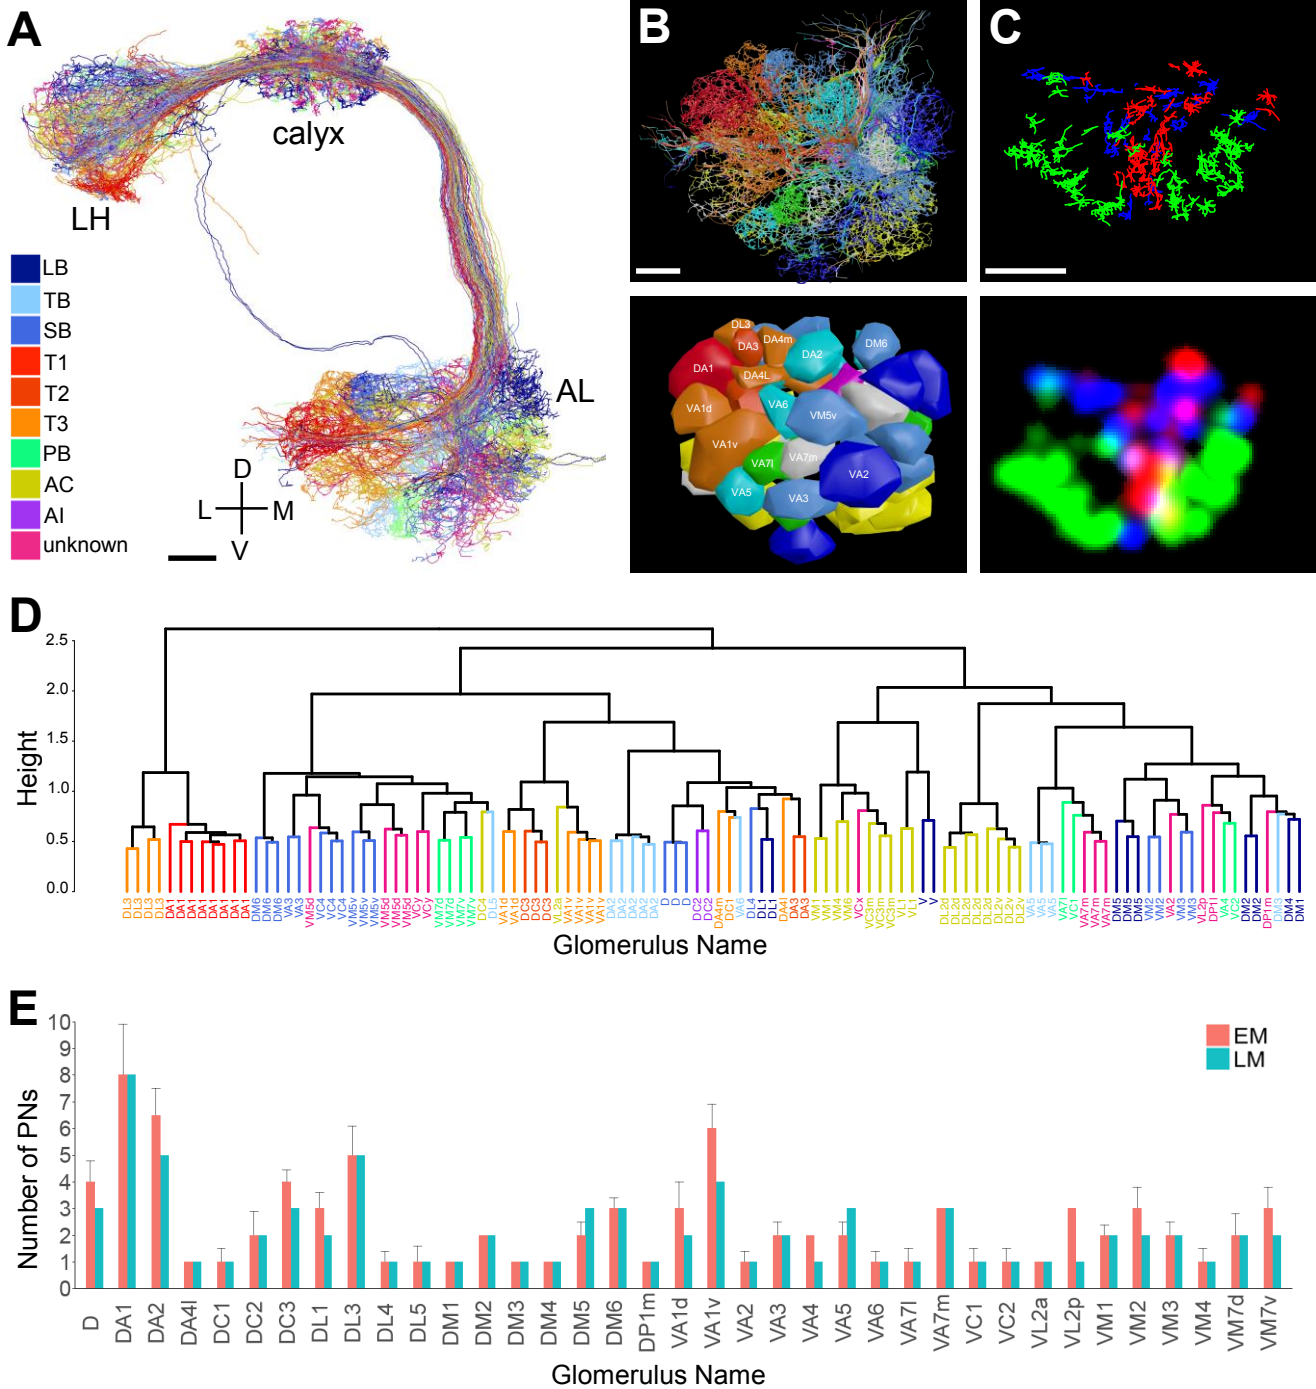

**Figure 4. Survey of Olfactory PNs Providing Driving Input to Microglomeruli in the Main MB Calyx Agrees with LM Data. See also Table S1.**

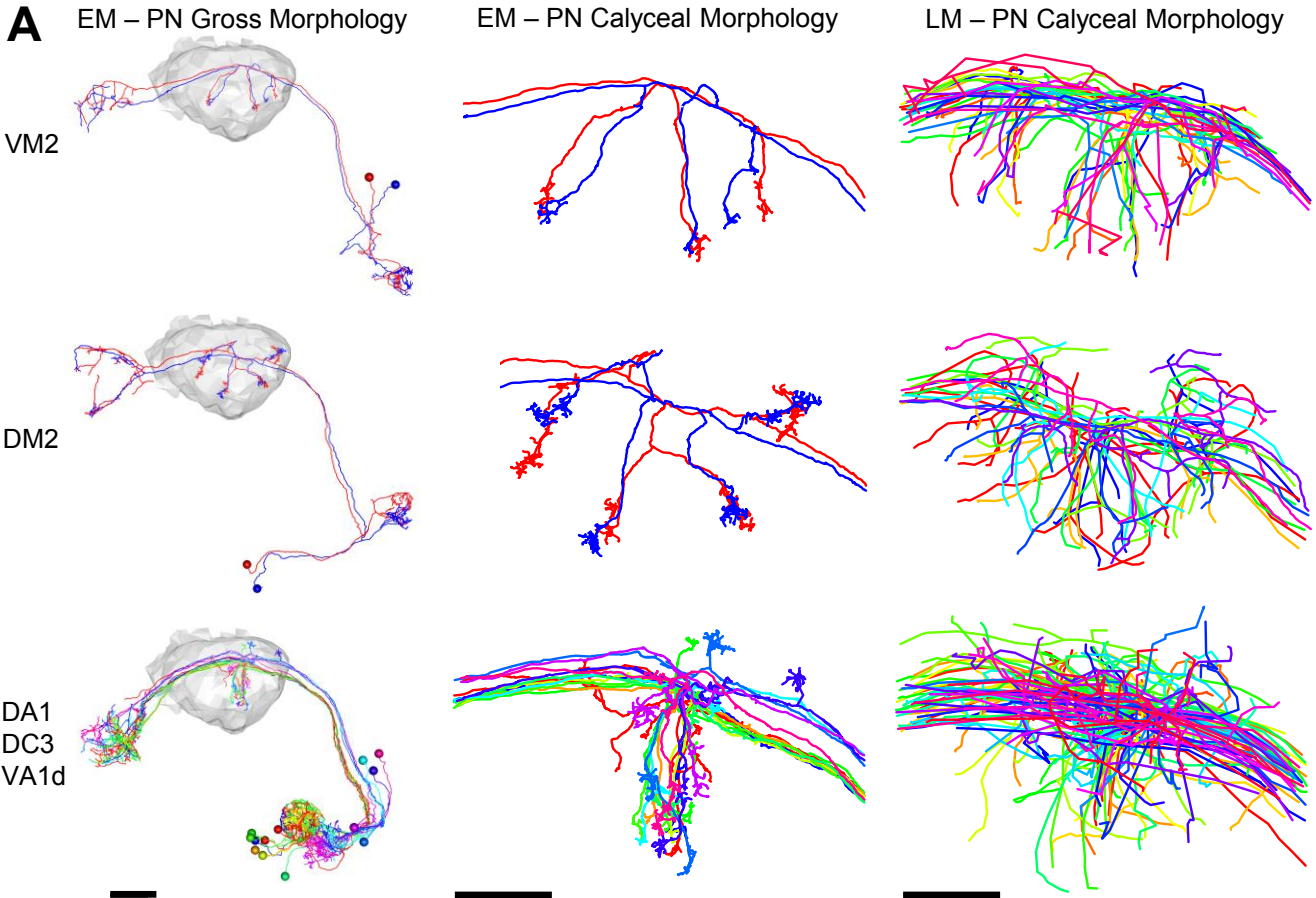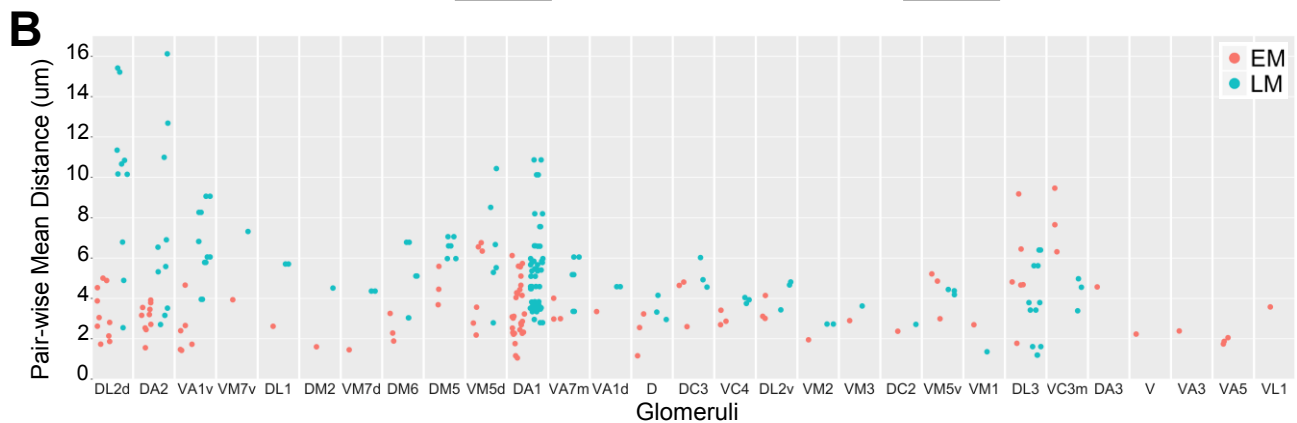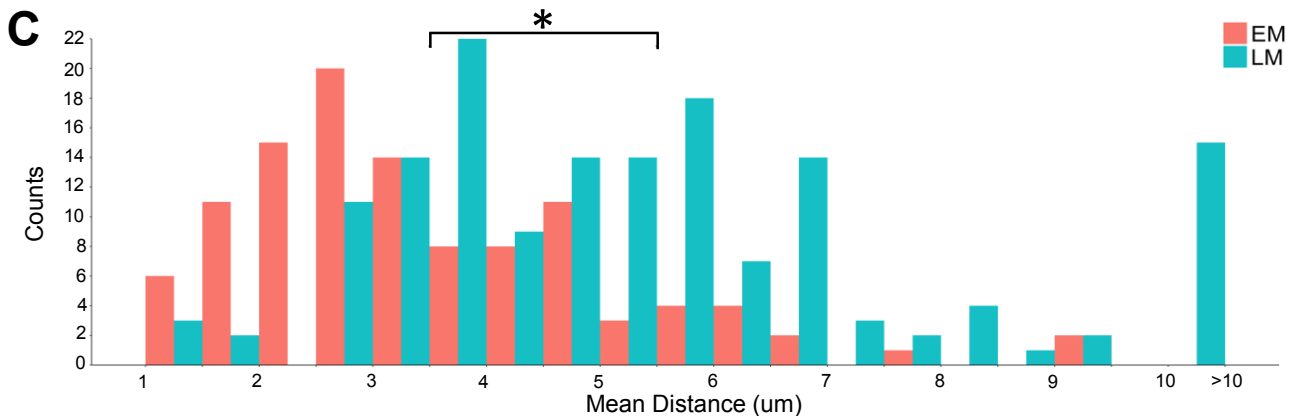

**Figure 5. PN Arbors in Calyx Cluster More Tightly Than Previously Seen with LM Across Individuals. See also Figure S7.**

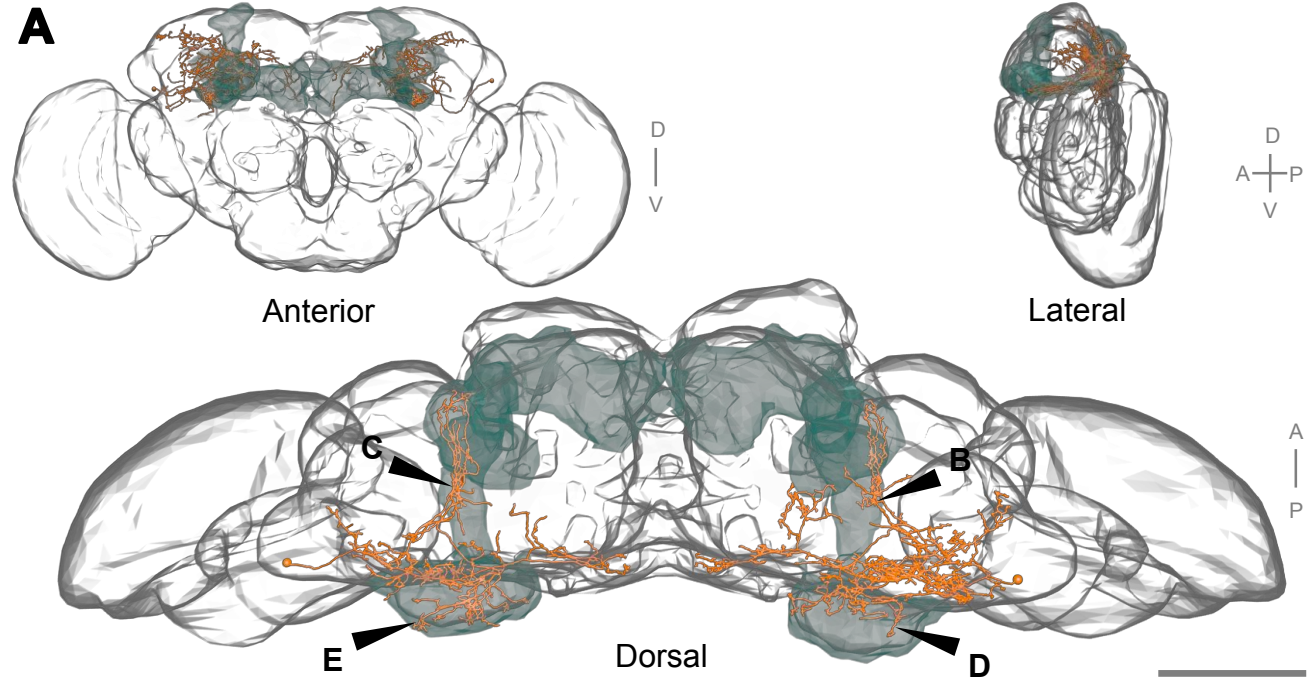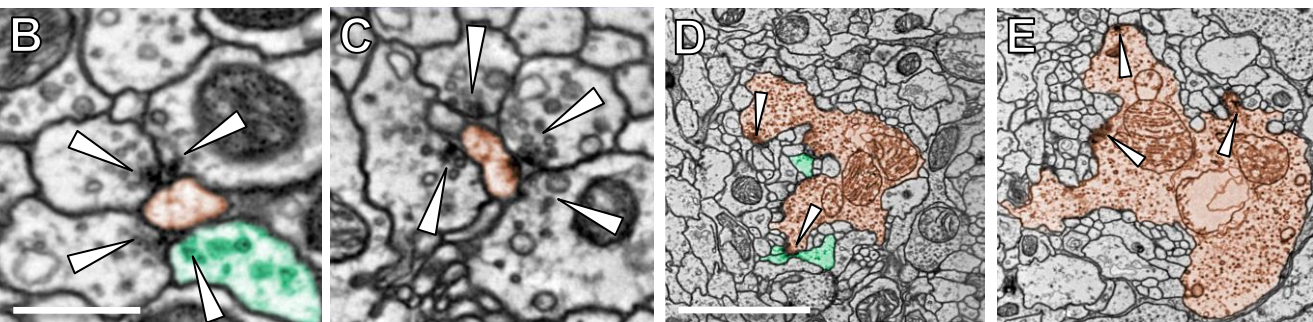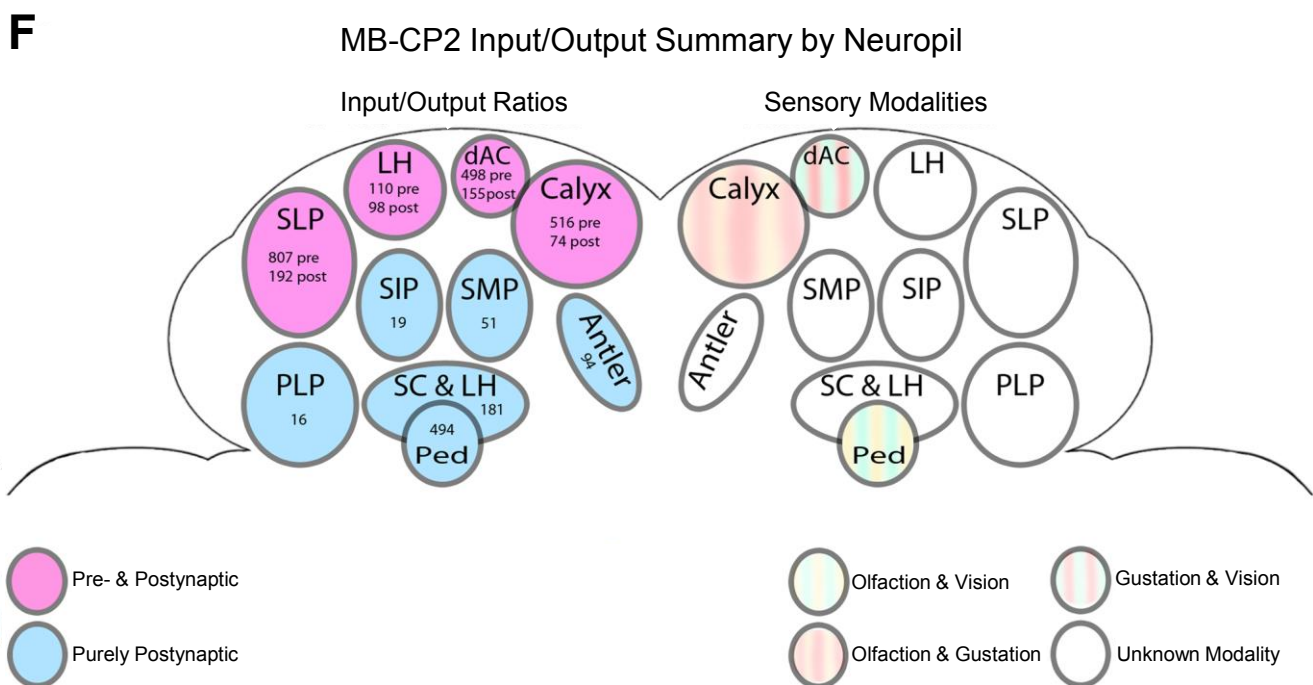

**Figure 6. MB-CP2, a New Cell Type Providing Microglomerular Input to KC Claws.**

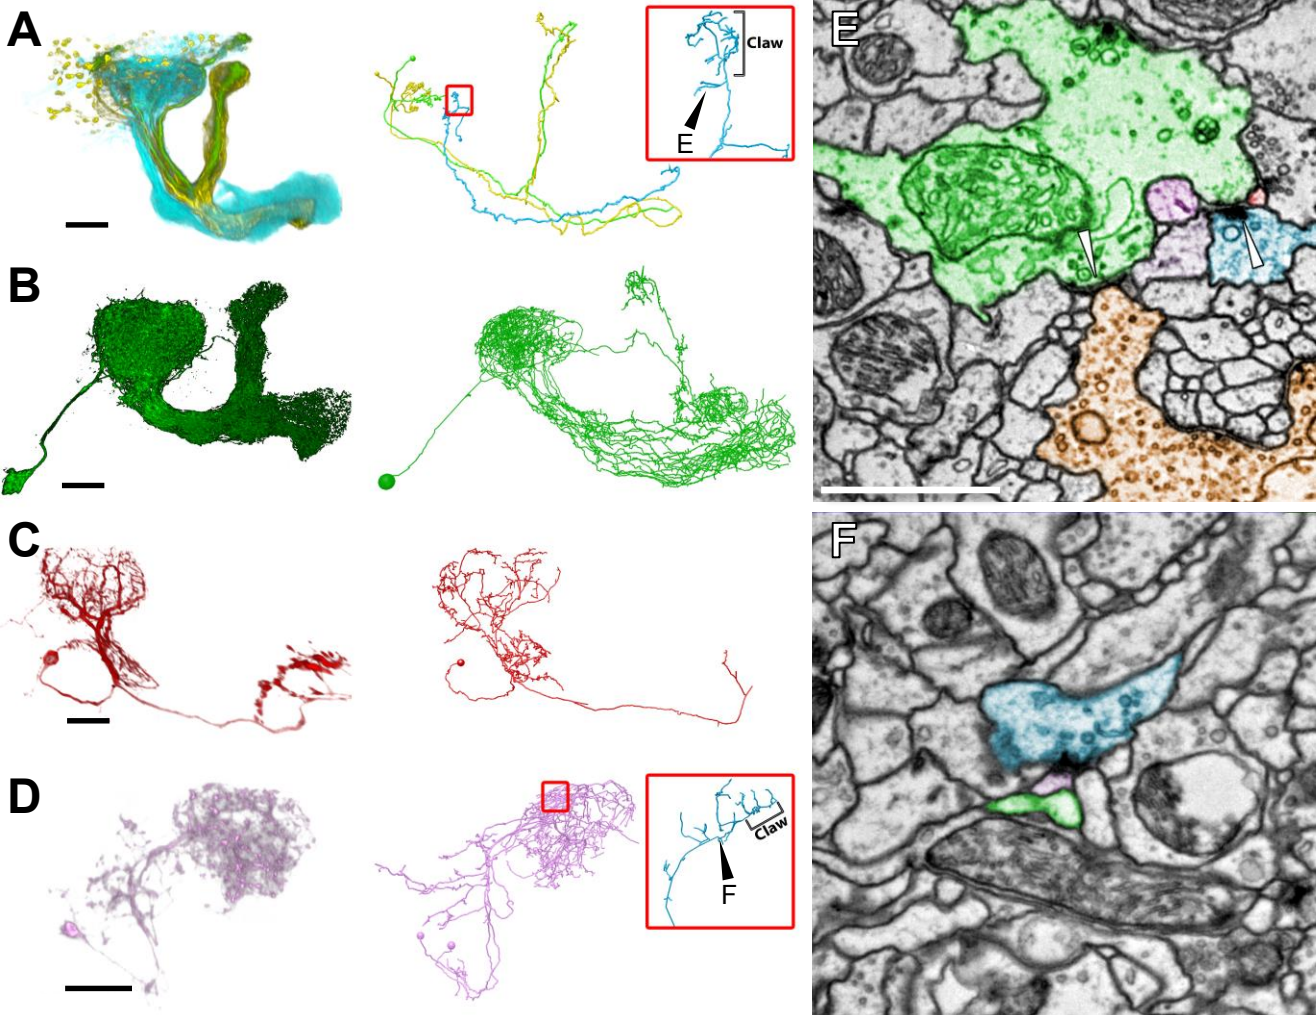

**Figure 7. KC Presynaptic Release Sites in the MB Main Calyx Mostly Target a Small Subset of Available Partners.**

## 1 STAR METHODS

2

## 3 CONTACT FOR REAGENT AND RESOURCE SHARING

4 Further information and requests for resources and reagents should be directed to and will be  
5 fulfilled by the Lead Contact, D.D.B. (bockd@janelia.hhmi.org).

6

## 7 EXPERIMENTAL MODEL AND SUBJECT DETAILS

8 Multiple brains of 7 day-old [iso]  $w^{1118}$  x [iso] Canton S G1 adult female flies were screened and  
9 one was picked for EM imaging.

10

## 11 METHOD DETAILS

### 12 Sample preparation

13 Brains from 7 day-old adult [iso]  $w^{1118}$  x [iso] Canton S G1 flies were dissected in cold fly saline  
14 (Olsen et al., 2007). The dissected brains were fixed with 2% glutaraldehyde in 0.1M sodium  
15 cacodylate for 1 hour at 4°C, followed by 1 hour at room temperature (RT). Following aldehyde  
16 fixation, the brains were rinsed 6 x 5 min with sodium cacodylate buffer at RT, 3 x 10 min  
17 incubations in 0.02M 3-amino-1,2,4-triazole (A-TRA) (De Bruijn et al., 1984) (Sigma-Aldrich) in  
18 sodium cacodylate, the last on ice, followed by post-fixation with 1% OsO<sub>4</sub> in sodium cacodylate  
19 containing 0.1M A-TRA for 90 minutes on ice. The brains were then rinsed with cold sodium  
20 cacodylate buffer, allowed to warm to RT followed by deionized or Milli-Q water at RT before  
21 being stained *en bloc* with 7.5% uranyl acetate in water overnight at 4°C. Following *en bloc*  
22 staining, brains were rinsed with water at RT and then dehydrated in an ascending ethanol

series to 100% ethanol, followed by 100% propylene oxide. Samples were infiltrated with EmBed 812 resin using propylene oxide to resin ratios of 2:1 and 1:2 for 30 minutes each followed by two 1-hour long incubations in 100% resin and a third 100% resin incubation overnight. Finally, samples were flat embedded between Teflon-coated glass slides and allowed to harden for 24 hours at 65-70° C.

Samples were subsequently screened for whole-brain sectioning by X-ray tomography using an Xradia XRM-510 X-ray microscope (subsequently acquired by Zeiss). Samples without obvious surface defects due to dissection, or internal defects were re-embedded in silicon rubber molds for sectioning (Fig. S3).

### **Sample supports, ultramicrotomy, and post-staining**

Custom bar-coded grids made from 100 µm thick copper beryllium with a 2 x 1mm slot, a unique serial identifier in human readable and 2-D barcode form and with fiducial markers were used to collect sections. Schematics and vendor information for the custom grids are available to non-profit research organizations upon request. Grids were prepared for picking up sections by first applying a silver/gold-color film of Pioloform (Pioloform FN, Ted Pella catalog #19244) followed by a ~8 nm layer of carbon. The Pioloform film was made thicker than normal to provide enhanced sample stability under the higher beam current necessary for rapid imaging (see below). To prepare the Pioloform film, a 600 µL aliquot of 2.05% Pioloform in dichloroethane was applied to an ethanol and hydrofluoric acid cleaned glass microscope slide (Gold Seal, Ted Pella catalog #260210) via spin coating using a Laurell WS400B-6NPP/Lite spin coater. After applying the Pioloform solution, the slide was spun for 1.4 seconds with a target speed of 8,000 rpm and an acceleration index of 255. The film was released from the slide by scribing the edges of the slide with a diamond scribe and slowly submerging the glass slide at a shallow

47 angle into a large dish of water. The film remains floating on the surface of the water and  
48 cleaned grids were then carefully placed, bar code side down, onto the film. The film and grids  
49 were subsequently picked up from above on a 1 x 3 inch slotted and anodized aluminum slide.  
50 The anodized surface also provided a stable and reusable surface from which the grids could be  
51 cut from the surrounding support film using a heated tungsten filament. Grids were loaded onto  
52 custom 203-place stainless steel plates for carbon coating.

53 Carbon coating was carried out in a Denton Explorer 14 high vacuum evaporator equipped with  
54 oil diffusion pump, liquid nitrogen cold trap, and a film thickness monitor using carbon rods (Ted  
55 Pella catalog #62-132). The carbon rods were de-gassed at sub-evaporation currents (8-14  
56 amps) prior to and immediately following sample loading. The 203-place plate was held at a 90-  
57 degree angle to the source at a distance of 10 cm during evaporation. Following a vacuum  
58 recovery period, the carbon rods were de-gassed and warmed at sub- to near-evaporation  
59 currents (8-16 amps). To avoid overheating the films, carbon was evaporated in a series of  
60 cycles (in our hands, each cycle was stopped when the deposition rate reached  $-0.5 \text{ \AA/sec}$  and  
61 resumed when the deposition rate returned to  $0 \text{ \AA/sec}$ ). Vacuum levels prior to evaporation were  
62  $\sim 5 \times 10^{-8}$  torr or better. Evaporation was carried out at  $22 \pm 1$  amps. Carbon evaporation was  
63 halted at an indicated thickness of 70 to 80  $\text{\AA}$  and final thickness assessed after a 5 minute cool  
64 down period. Successfully prepared grid films remained perfectly flat when held within  $\sim 1$  mm of  
65 a water surface (Figure S3F) whereas unsuccessful films displayed a relaxation of the film  
66 tension when held close to water (Figure S3E). Grid batches in which coatings tested did not  
67 remain flat were rejected.

68 Serial sections of the brain were cut with a Leica UC-6 ultramicrotome at a thickness of 35-40  
69 nm, with periodic retrimming of the block face. Total sectioning time was  $\sim 3$  weeks. Typically, 3

serial sections were collected on each of the ~2,400 custom bar-coded grids needed to collect the 7000+ sections necessary to encompass the whole brain.

Following sectioning, grids were stained in 3% aqueous uranyl acetate for 20 minutes followed by Sato's lead (Sato, 1968) for 5 minutes, with ddH<sub>2</sub>O washes after each staining step. To facilitate the staining of ~2,400 grids, a custom Plexiglass staining device with slots to hold 100 grids at a time, loosely based on the Hiraoka (1972) device, was used.

## Electron Microscopy

Two FEI Tecnai Spirit BioTWIN TEMs were used to image the whole fly brain series. The first, a TEMCA2 system (Figure 1C, Figure S2A), was equipped with a custom single-axis Fast Stage, vacuum extension, scintillator (5  $\mu$ m Mylar on a support ring 9  $\frac{5}{8}$  inches in diameter, coated with 10 mg fine-grained P43/cm<sup>2</sup>; Grant Scientific), and four Fairchild SciMOS 2051 Model F2 5.5 megapixel cameras (2560 x 2160 pixel sensor size) configured in a 2 x 2 array. The second TEM was equipped with an Autoloader (Figure 1G, S2E), a custom scintillator (6 mg fine-grain P43/cm<sup>2</sup>; Grant Scientific), and a single Fairchild SciMOS camera. In both systems, 4:1 minifying C-lenses (AMT) were mounted on the SciMOS cameras using custom lens mounts (AMT). These systems were previously described in abstract form (Robinson et al., 2016). Schematics and model files for the Fast Stage and Autoloader are available to non-profit research organizations upon request.

The Fast Stage has a single high-speed axis of motion, and is designed to interface an FEI CompuStage goniometer (Figure S2B), which provides the other degrees of freedom necessary to position a sample in the TEM. The sample holder is connected to a drive rod, which passes through a custom rolling-element bearing, vacuum sealing bellows, and a rolling-element

93 damper (Figure 1D, S2B). The drive rod is connected to a slide-mounted encoder which  
 94 provides nanometer-resolution positional feedback. It is moved linearly by a precision piezo  
 95 motor (Physik Instrument cat N301K151). The custom rolling-element tip bearing provides rigid  
 96 lateral support to the drive rod within the outer drive rod tube, while minimizing axial friction  
 97 required to move the driven mass of the system. The custom rolling-element dampers kill  
 98 vibrations of the drive rod induced by the pulsed motion of the piezo motor during moves.  
 99 Without these dampers, the drive rod would vibrate for hundreds of milliseconds under the  
 100 pulsed motion of a move, rendering the system unusable. With the dampers, 8-24 micron moves  
 101 are reliably achieved where all vibrations are damped to less than 5 nanometers in less than 50  
 102 milliseconds (Figure S2C). The miniature vacuum bellows isolates the specimen-holding region  
 103 of the device from atmospheric pressure of the operating environment. By locating the vacuum  
 104 bellows just behind the O-ring in an FEI style holder, the volume needed to be evacuated after  
 105 sample insertion is minimized, allowing samples to be exchanged in the same amount of time as  
 106 a conventional holder.

107 The Autoloader GPS (Figures 1I, S2E-F) is a complete replacement for the FEI CompuStage  
 108 goniometer and specimen holder, and provides all required degrees of freedom to position a  
 109 specimen within the TEM column. High-speed single-axis motion is supported by the same drive  
 110 mechanisms used in the Fast Stage. Other axes of motion are provided by piezo-driven and  
 111 brush motors (Figure S2). The rotational angle of the sample can be changed by placing the  
 112 sample grid on a rotary pre-aligner, rotating to the desired angle, and picking the sample back  
 113 up again in the gripper (Movie S3). The machine vision system enabling automated handling of  
 114 samples in the Autoloader recorded continuous video while operating, providing visual  
 115 confirmation of proper operation and an invaluable debugging tool in the event of handling  
 116 errors. To enable a continuous video stream as well as high dynamic range images suitable for

117 image processing, the acquisition stream automatically adjusts image gain and exposure time  
118 for the required regime. These changes can be seen in Movie S3.

119 Image acquisition on the TEMCA2 system was performed at an indicated scope magnification of  
120 2900x, while the single camera Autoloader equipped system operated at 4800x indicated  
121 magnification. The longer vacuum extension of the TEMCA2 system enlarged the projected  
122 image by ~1.7x, resulting in ~4 nm/pixel for both systems.

123 Software control of the TEMCA2 and Autoloader systems was written in LabVIEW (National  
124 Instruments). Wrapper software to interface the Fairchild SciMOS cameras with LabVIEW was  
125 written in C. Hardware triggers were used to interleave stage motion with camera frame buffer  
126 acquisition. Each camera was read out by a dedicated analysis workstation (Dell), or 'acquisition  
127 node,' connected via 10 Gb Ethernet to a central 'control node' which managed hardware  
128 triggering, stage control, region of interest (ROI) specification, mosaic preview, and user  
129 interface for hardware control. Low-latency TEM hardware control (such as beam blanking,  
130 valve operation, CompuStage control, magnification and focus adjustments, and electron beam  
131 diameter) was achieved by direct communication between LabVIEW software and the FEI  
132 dynamic-link library (DLL) files supporting the FEI Tecnai scripting environment, through the  
133 DLLs' component object model (COM) interfaces.

134 Acquisition nodes measured translational drift between successive image frames in near real-  
135 time, using the NI Image analysis package (National Instruments). If drift exceeded a user-  
136 specified threshold, they were discarded and additional frames were acquired until the  
137 requested number was acquired or until a user-specified timeout was exceeded. Each  
138 acquisition node allocated three tiers of memory buffer to the image processing pipeline, to  
139 allow real-time acquisition to continue unimpeded, regardless of variations in CPU load,  
140 operating system memory management, disk performance, or network throughput. In the first

141 tier, raw image frames were processed for drift estimation. In the second tier, sets of image  
 142 frames were translated (to correct for small translations by the sample stage), summed,  
 143 normalized to a background image of the scintillator, and histogram-adjusted. In the third tier,  
 144 the summed and normalized images were written to disk. As images exited each of these  
 145 buffers, memory was recycled so new images could be acquired and processed. Due to the  
 146 rapid rate of data acquisition, multiple storage servers, each connected via 10 Gb Ethernet,  
 147 were written to in round-robin fashion. Each server contained two RAID 6 volumes, and up to  
 148 four servers were deployed in parallel during data acquisition. If a RAID 6 volume or a server  
 149 went offline, images were written to other volumes in the available set. SSDs were installed in  
 150 each acquisition node to allow an acquisition to complete in the event of total network failure  
 151 during acquisition. This infrastructure was capable of supporting sustained output from the two  
 152 TEMCAs and the Autoloader. No data were lost due to storage or network issues during  
 153 acquisition of the whole-brain EM volume.

154 Autoloader control software was substantially similar to the TEMCA2 software except that it also  
 155 controlled the Autoloader hardware. Autoloader-specific functionality included machine-vision-  
 156 guided pick-and-place and pre-alignment of sample grids, automatic focus of the TEM, and  
 157 region of interest relocation across grid picks. We also developed a user interface to let the  
 158 operator define the sequence of imaging steps to be performed as well as accompanying  
 159 microscope parameters for each step. All software for control of the SciMOS cameras, TEMCA2  
 160 systems, and the Autoloader is available to non-profit research organizations upon request.

161 For TEMCA2-imaged samples, a 16.2 nm/pixel pre-bake mosaic was acquired at 60 ms  
 162 exposure time to pre-irradiate the sample and reduce specimen warping and shrinkage under  
 163 high dose acquisition. The 16.2 nm/pixel mosaics were used to specify ROIs for 4 nm/pixel  
 164 mosaic acquisition. The 4 nm/pixel mosaics were acquired at 35 ms exposure times. Frames

165 were analyzed for drift in real time and 4 frames with less than 16 nm frame-to-frame drift were  
 166 translated into pixel-level alignment, summed, intensity corrected, and saved. Mosaics were  
 167 acquired in a boustrophedonic fashion column by column (figure S2D) running down the long  
 168 axis of the 2 x 1 mm slot across the three sections such that use of the fast, piezo-driven stage  
 169 axis was maximized during acquisition while slower CompuStage moves were minimized. Due  
 170 to non-overlapping fields of view on TEMCA2, a two-step approach was utilized where a small  
 171 stage displacement (~1900 pixels, or 7.6  $\mu\text{m}$ ) filled the gap between the fields of view was  
 172 followed by a large displacement (~5500 pixels, or 22.0  $\mu\text{m}$ ) moving to a completely fresh field  
 173 of view; this schema was utilized on both x and y axes with x and y steps being slightly different  
 174 (5550/1950 and 5450/1850, respectively, big step/small step, in pixels). Accurate calibration of  
 175 pixels per micron is essential for converting pixel distances into physical distances and allows  
 176 for pixel distances to be kept constant while the conversion factor was varied depending on the  
 177 indicated magnification of the microscope.

178 Samples are organized in the Autoloader as follows. The Autoloader holds a magazine (Figure  
 179 1L) containing 8 cassettes. Each cassette holds 64 sample grids (Figure 1F) for a total  
 180 magazine capacity of 512 sample grids. The Autoloader affords random access to the individual  
 181 grids, which can be retrieved, oriented, loaded into the TEM, imaged, and reliably returned to  
 182 their proper address in the Autoloader. The Autoloader imaged samples in a two-pass routine  
 183 where grids were returned to cassettes between acquiring pre-bake mosaics and 4 nm/pixel  
 184 mosaics. The interval between imaging steps allows for the designation of ROIs for 4 nm/pixel  
 185 imaging. To ensure that ROIs were accurately acquired, the Autoloader found the center of the  
 186 grid slot every time a grid was loaded into the TEM column. This center point was used to align  
 187 ROIs and correct for small differences in grid orientation resulting from the two-pass workflow.

188 The Autoloader system employed a single point autofocus routine at the center of each section  
189 to determine focus for each ROI acquired.

190 High-speed generation of mosaics necessitates high electron dose rate at the sample (typically  
191 ~180x the dose rate required for a 2 second exposure on Kodak 4489 film at 120 kV) to saturate  
192 the sensor wells within the short interval (35 ms in our case, vs. ~1-2s typical integration time).  
193 Pre-irradiation images of the grids were used to subdivide the samples into three ROI classes:  
194 (1) Included areas sufficiently free of substrate damage and contaminants to sustain imaging at  
195 the highest beam currents; (2) Excluded areas to be masked out of the data set entirely; (3)  
196 Borderline areas of usable but lower quality to be imaged at one tenth intensity.

197 Four sections (not consecutive) were lost during sectioning; and two grids, each containing 3  
198 serial sections (3595-3597 and 6883-6885), were found to have ruptured support films after  
199 post-sectioning staining but prior to EM imaging. Sections with debris or cracks in the support  
200 film were imaged in two rounds: a high-dose, high-throughput round, excluding potentially fragile  
201 areas of a section; and a subsequent low-dose, slow exposure round, of the fragile region only.  
202 Twenty-seven sections in 9 grids ruptured toward the end of second round imaging when the  
203 low-dose electron beam hit artifacts. However, a majority (if not the entirety) of the section was  
204 already successfully imaged. In this case, although the sections were successfully imaged, the  
205 support film rupture precludes future re-imaging of these 27 sections.

206

## 207 **Volume Reconstruction Pipeline**

### 208 *Overview*

209 For each imaging acquisition system used, small step size calibration mosaics and a small  
210 reference mosaic in the same area on three reference grids were acquired. The calibration

211 mosaics were used to calculate a correction for non-affine lens distortion for each camera in that  
 212 particular acquisition system (Kaynig et al., 2010). The reference mosaics were then used to  
 213 calculate the remaining affine distortion of each camera relative to all other cameras and  
 214 acquisition systems, resulting in a global camera calibration model across all cameras and  
 215 imaging systems involved. In the event that the imaging system configuration was modified (e.g.  
 216 for camera refocusing or scintillator replacement), a new calibration mosaic was acquired, and  
 217 new camera calibration models were calculated. Relational and non-relational databases were  
 218 used to track image metadata and computed image transformations throughout the volume  
 219 reconstruction process, and raw image data were processed using a custom-developed, highly  
 220 scalable and efficient cluster-backed linear solver to stitch all section mosaics independently  
 221 (Methods).

222 The majority of low-dose/high-dose (see Electron Microscopy) sections are acquired during a  
 223 single session, without the sample being removed from the microscope. Therefore, a reliable  
 224 first guess for relative positions of these layer patches is usually provided. Generally, low-  
 225 dose/high-dose sections are registered in a process that takes advantage of components of the  
 226 general registration pipeline above. Montages of individual acquisitions are generated and their  
 227 point-matches stored. All montages sharing the same z-value (i.e. the low-dose/high-dose group  
 228 of sections), together with reference neighbor “sandwich” sections are treated as a set of  
 229 sections that are roughly aligned to each other as if they were all separate sections. This rough  
 230 alignment is used to determine potential overlap of low-dose and high-dose areas. Tile-pairs are  
 231 determined and their point-matches calculated and stored. Finally, all point-matches (within-  
 232 layer, across low-dose/high-dose patches, and cross-layer to neighboring reference sections)  
 233 are used to solve a linear system to determine transformation parameters for a seamless  
 234 registration.

## 235 *Migration of data*

236 As noted above, camera images were written in a round-robin fashion across multiple high-  
237 speed RAID 6 storage servers. Mosaics selected for inclusion into the final reconstructed  
238 volume were copied to a centrally managed distributed file system at Janelia Research Campus  
239 offering high-throughput connectivity to the computational cluster as well as off-site backups. All  
240 images were checksum verified after file copy operations.

241

## 242 *Stack management & relational database*

243 We created a relational database for storing and querying metadata associated with the  
244 thousands of image mosaics and millions of acquired images. We use SQL Server 2012 for our  
245 production system and SQLite for development. Metadata required for downstream processing  
246 included: paths to image data (with checksums), stage coordinates, ROIs associated with  
247 nominal section numbers, ordering of sections and microscope configurations with associated  
248 calibrations. The input for the alignment process – a stack – can be generated with a single SQL  
249 query joining the majority of tables. The result is a list of images with their layer (z), stage  
250 coordinates (x,y), and camera configuration (for associating the correct lens correction model).

251 The alignment process of the approximately 21 million images and associated projection of  
252 already-traced skeletons between alignment iterations is computationally expensive. To manage  
253 this we developed the Renderer toolkit (<https://github.com/saalfeldlab/renderer>), a set of  
254 image stack management tools and RESTful HTTP web services now in use in multiple  
255 additional projects. Renderer was designed in order to handle large scale (hundreds of millions)  
256 of individual records efficiently while supporting large-scale concurrent access for the  
257 stitching, section order analysis, skeleton mapping and intensity correction. Briefly, Renderer is  
258 able to quickly materialize (i.e. render) modified images for a set of transformation parameters  
259 using the mpicbg transformation library (<https://github.com/axtimwalde/mpicbg>). The use of the

mpicbg library allows simple conversion between the Renderer database (a MongoDB instance) and TrakEM2 projects. For large scale rendering and coordinate mapping, we used Java standalone and Spark framework clients to allow it to be processed in bulk on a cluster.

### *Calibration mosaics*

In our TEMCA2 system, we operate with a wider field of view than a conventional TEM which comes at the cost of individual images showing significant non-linear distortion. This distortion is the accumulation of camera lens-distortion, variation in camera mounting, and warping in the electron beam path. We compensated for this distortion using the lens-correction method available in TrakEM2 (Kaynig et al., 2010) followed by affine normalization between all distortion models. For each individual camera, we imaged a 3 x 3 mosaic of redundantly (60%) overlapping tiles of a neuropil region in one of our sample grids. This mosaic was then used to estimate a non-linear distortion correction model in TrakEM2. To compensate for the remaining affine distortion (scale and shear) of each of these camera models, we imaged a large reference montage in the neuropil region of three reference sections (to account for accidental section loss) that we then jointly aligned with TrakEM2. This way, we obtained a globally consistent camera calibration model for each individual camera. We repeated the calibration step each time an imaging system was adjusted, resulting in a set of 15 independent camera calibration models for the complete *Drosophila* brain.

### *Alignment*

The image acquisition process provides partially overlapping images that are assumed to cover the entire region of interest. Image mosaics need to be stitched within each z-section plane, as well as aligned across z to produce a seamless volume. Details of the methods and documentation of actively used code are available at

285 [\[https://github.com/billkarsh/Alignment\\_Projects/blob/master/00\\_DOC/method\\_overview.md](https://github.com/billkarsh/Alignment_Projects/blob/master/00_DOC/method_overview.md);[http](http://s://github.com/billkarsh/Alignment_Projects/blob/master/00_DOC/ptest_reference.md)  
286 [s://github.com/billkarsh/Alignment\\_Projects/blob/master/00\\_DOC/ptest\\_reference.md](http://s://github.com/billkarsh/Alignment_Projects/blob/master/00_DOC/ptest_reference.md)] and  
287 [\[https://github.com/khaledkhairy/EM\\_aligner\]](https://github.com/khaledkhairy/EM_aligner).

288 Here we provide a summary. The reconstruction process consists of two steps. (1) Matching of  
289 putatively identical content between pairs of overlapping images; those matched point-pairs are  
290 stored in a table. (2) Using point-pairs to solve for linear (affine) transforms that map local image  
291 coordinates to a common stitched volume coordinate system.

292

### 293 *Matching point-pairs within mosaics*

294 Matching is first done within each of the serial sample sections (z-layers), considered  
295 independently of any other sections. Two neighboring images would match essentially perfectly  
296 except for very slight differential beam heating.

297 TEM stage coordinates provide useful guesses about which pairs of images have overlaps  
298 worth characterizing, as well as the expected relative transform between pair members that we  
299 can use to constrain content matching. For each prospective pair of images we first perform  
300 coarse matching using normalized FFT-based cross-correlation to obtain a best rigid transform  
301 between them: relative rotation and XY-translation. The expected constraint transform enters as  
302 a mask describing a disc of preferred XY-translations within the correlation image.

303 The coarse transform between image A and B is then refined using a deformable mesh as  
304 follows. Within the overlap region of A and B, the A-pixels remain at fixed coordinates. For the  
305 B-image pixels, we erect a mesh of triangles and each of the B-pixel coordinates within are  
306 translated into barycentric coordinates (functions of the triangle vertices) which are variables.  
307 The normalized cross-correlation between A and B can now be expressed as a function of mesh  
308 vertex coordinates. A gradient descent process is used to find vertex positions that optimize  
309 correlation.

310 The reported point-pairs linking A to B are derived from the triangles of the mesh. Image-point A  
311 is defined as the centroid of a given mesh triangle prior to optimization. Its corresponding B-  
312 image point is obtained by calculating the affine transform that takes the triangle to its optimized  
313 counterpart, and applying that to the A-centroid.

314

### 315 *Matching point-pairs across layers*

316 Since the layers are nominally 40 nm thick and neural processes propagate through tissue at all  
317 possible angles, content in adjacent layers is grossly similar but isn't a precise match.  
318 Nevertheless, content-based matching as described above for same-layer image pairs (FFTs  
319 followed by deformable mesh optimization) works very well if combined again with expected  
320 pair-pair transforms for which we have high confidence.

321 First we match whole layers to each other: For each layer, individually, we collect the reported  
322 in-layer point matches and solve for its set of affine transform parameters that register that  
323 layer's 2D images to form a so-called montage. These data are used to render the layer at a  
324 reduced scale (~20X) to an image that we call the "montage scape". Scale reduction allows the  
325 problem to fit comfortably in RAM, reduces computation time, and most importantly, emphasizes  
326 larger size tissue features such as large neurites running parallel to the z-axis, which vary much  
327 more slowly as a function of z than neuropil. Each pair of montage scapes is matched by FFT  
328 cross-correlation at a series of angles and the best correspondence is determined. This is  
329 followed by manual inspection using TrakEM2 (Cardona et al., 2012) to verify this rough  
330 alignment.

331

### 332 *Aligning Section Montages and Section-order Correction*

333 For larger volumes, we implemented a fully automated procedure for whole-layer matching.  
334 SIFT features are extracted from section montages, and point-correspondences are determined

for all pairs of sections within a range of expected ordering mistakes (in our case within 100 sections). We then use the number of point-correspondences between two sections as a surrogate for their inverse relative distance and identify the shortest possible path to visit all sections, resulting in an ordered series (Hanslovsky et al., 2017). Then, a regularized linear system is solved to calculate an affine transformation for each section that roughly aligns the volume.

With a given pair of layers now coarsely aligned, we subdivide each layer into an array of 'blocks' (~10 x 10 neighborhoods of image tiles). We again step angles and calculate FFT cross-correlation, this time on pairs of corresponding blocks to find the best block-block transforms. As a result we know which images within the blocks pair with each other and what their relative transform ought to be. Again, we subdivide each image into local regions, estimate point correspondences using FFT-based cross-correlation, and collected these correspondences in a database.

### *Solving the volume*

With the full set of point pairs tabulated, each image is typically connected to several of its neighbors. We then construct a system of equations requiring that, under the sought affine parameter set that defines each image transformation, point-pairs should map to the same global point in the reconstructed volume. To avoid spurious deformation and volume shrinkage, the equation system is regularized to a roughly aligned volume. This roughly aligned volume depends on individual montages that were in turn regularized to a rigid model approximation that is independently estimated. The full system constitutes a large linear sparse matrix problem, whose solution provides the globally optimal transformation for all images simultaneously.

## 360 *Sources of error*

361 - Wrong (low-quality) point-pairs: These may occur due to the self-similarity of nominally  
 362 good quality neural EM images. Errors are even more likely in tissue regions that are  
 363 substantially devoid of neurons or texture, such as the lumen of the esophagus, or along the  
 364 outer boundary of the sample where tissue is sparse or even absent from several image tiles.  
 365 To address this error we employ (a) auxiliary contextual information about the likely transform  
 366 between any two images that constrains matching derived from local image content alone, and  
 367 (b) we impose a strict point-matching filter using Random Sample Consensus (RANSAC);  
 368 (Fischler and Bolles, 1981) to separate true correspondences that behave consistently with  
 369 respect to an affine transform up to a maximal correspondence displacement (Saalfeld et al.,  
 370 2012).

371 - Missing point-matches: In some cases tissue damage, contamination or folds within a  
 372 section lead to a lack of point-matches in a smaller region within the volume. This is most  
 373 prominent when searching for point-matches across z. We address this issue by extending the  
 374 point-match search beyond immediate neighbor sections.

375

## 376 *Render (Image Intensity Correction)*

377 During iterative volume reconstruction, gradient-domain processing is used to remove seams in  
 378 two dimensions. A target gradient field is constructed by computing the gradient field of the input  
 379 mosaic and zeroing out seam-crossing gradients. Then, a least-squares system is solved to find  
 380 the new image whose gradients best fit the target field. In addition, low-frequency modulation is  
 381 removed by computing the windowed average of adjacent mosaics and replacing the low-  
 382 frequency components of an input mosaic with the low-frequency components of the average.  
 383 We anticipate that future work will allow 3D processing of the whole-brain image volume  
 384 (Kazhdan et al., 2015), reducing or eliminating section-to-section variations in intensity.

385

## 386 *Projection of arbor tracing across alignments*

387 With each new alignment, the CATMAID PostgreSQL database containing all neuronal skeleton  
 388 coordinates (Schneider-Mizell et al., 2016) is dumped to retrieve their "world" coordinates  
 389 (coordinates representing their physical location in the brain). Each of these world coordinates is  
 390 then inversely transformed using the Renderer service (see "Stack management & relational  
 391 database" section) to a set of "local" coordinates detailing the source tile visible at that location  
 392 and the relative location within. The local coordinates are projected back into world coordinates  
 393 using the new alignment's transformations. The updated coordinates are then applied to a new  
 394 copy of the database.

395

## 396 **Neuron Tracing**

397 Neuron reconstructions are based on manual annotation of neuronal arbors from image stacks  
 398 in CATMAID (<http://www.catmaid.org>) as described in (Schneider-Mizell et al., 2016). All  
 399 neurons included in analyses are reconstructed by at least 2 team members, an initial tracer and  
 400 a subsequent proofreader who corroborates the tracer's work. In the event that any tracer or  
 401 proofreader encounters ambiguous features (neural processes or synapses that are not  
 402 identifiable with 100% confidence), they consult other tracers and proofreaders to determine the  
 403 validity of said features, climbing the experience ladder up to expert tracers as needed. If any  
 404 feature remains ambiguous after scrutiny by an expert tracer, then said feature is not included in  
 405 the neural reconstruction and/or flagged to be excluded from analyses. During the proofreading  
 406 phase, the proofreader and tracer iteratively consult each other until each neuron is deemed  
 407 complete per the specific tracing protocol to which it belongs. An assignment of completion does

not necessarily entail that an entire neuron's processes and synapses have been reconstructed (see "Tracing to Classification" and "Tracing to Completion" sections below).

The criteria to identify a chemical synapse include at least 3 of the 4 following features, with the first as an absolute requirement: 1) an active zone with vesicles; 2) presynaptic specializations such as a ribbon or T-bar with or without a platform; 3) synaptic clefts; 4) postsynaptic membrane specializations such as postsynaptic densities (PSDs). In flies, PSDs are variable, clearer at postsynaptic sites of KCs in a micro-glomerulus but often subtle, unclear, or absent in other atypical synaptic contacts (Prokop and Meinertzhagen, 2006). In the absence of clear PSDs, all cells that are immediately apposed across a clearly visible synaptic cleft are marked as postsynaptic. We did not attempt to identify electrical synapses (gap junctions), since they are unlikely to be resolved at the 4 nm x-y pixel size of this data set.

#### *Tracing to Classification*

Often only reconstruction of backbone (e.g. microtubule-containing 'backbone' neurites, (Schneider-Mizell et al., 2016) or gross morphology is needed to classify a neuron based on expert identification or NBLAST-based neuron searching against an existing LM dataset. If either approach fails to find a match (as in the case of MB-CP2 in our study), the neuron may be deemed a new cell type. Neurons traced to classification are at a minimum skeletonized, with or without synapses, to the point at which their gross morphologies (or backbone skeletons) unambiguously recapitulate that observed by LM for a given cell class, or are unambiguously deemed as a new cell type not previously observed in all LM database from NBLAST neuron morphology search and/or multiple experts.

### 431 *Tracing to Completion*

432 All steps for tracing to classification were completed. Additionally, every identifiable process and  
433 every identifiable synapse is traced within the data set.

434

### 435 *Multiverse*

436 Three teams each comprising 2 members, 1 tracer and 1 proofreader, reconstructed the same  
437 KC fragment to completion in tracing environments blinded to each other. In the tracing phase,  
438 the tracer had access to the proofreader for consult and verification. During the proofreading  
439 phase the proofreader had access to the tracer for consult and verification. When complete the  
440 reconstructions were merged into a single viewing environment for comparison (Figure S6).

441

### 442 *Tracing of Projection Neurons*

443 Three protocols were used to reconstruct olfactory projection neurons (PNs) on the right side of  
444 the brain: **1)** putative PN boutons presynaptic to all traced claws of ~300 KCs as part of a  
445 separate ongoing effort of KC reconstructions (data not shown) were seeded and traced to  
446 classification. **2)** A seed section at the posterolateral bend of the mALT, proximal to MB calyx,  
447 was selected and all neurons not found via protocol 1 were traced first directly toward the calyx.  
448 Neurons that innervated calyx were traced to classification, whereas those that bypassed calyx  
449 were halted. **3)** A thorough visual survey of the calyx was conducted to ensure that all  
450 microglomerular structures had been identified and the untraced boutons within these  
451 microglomeruli were seeded with single skeleton nodes then traced to classification.

452

### 453 *Delimitation of Boutons in Projection Neurons*

454 Projection neuron axonal boutons in the calyx were identified by varicosities containing arrays of  
455 presynaptic active zones each apposed to many postsynaptic processes (Figure S1A). Skeleton  
456 nodes at the varicosity/intervaricosity borders were tagged as “bouton borders” such that they  
457 contained all synapses inside each varicosity.

458

#### 459 *Kenyon Cells and their Calyceal Postsynaptic Partners*

460 Three KCs from each of the KC classes that innervate main calyx ( $\gamma$ ,  $\alpha\beta c$ ,  $\alpha\beta s$ ,  $\alpha'\beta'm$ , and  
461  $\alpha'\beta'ap$ ) were selected from a larger set of several hundred KCs already traced to classification  
462 as part of an ongoing study. All neurons postsynaptic to every presynaptic release site of the 15  
463 KCs in the PN bouton-containing portion of the calyx (namely, postsynaptic partners in the  
464 calyx) were enumerated and traced to classification. Postsynaptic partners to low order KC  
465 dendrites were not traced unless these dendrites occupied the PN bouton-containing portion of  
466 the main calyx.

467

#### 468 *MB-CP2*

469 The 2 MB-CP2 neurons were traced to classification per the “Tracing to Classification” section  
470 above. Additionally, samples of their synapses were traced within each neuropil they innervate.  
471 More synapses were traced for the right hemisphere neuron than the left hemisphere, as the left  
472 hemisphere neuron was traced to recapitulate the morphology and synapses observed in the  
473 right hemisphere.

474

#### 475 **Neuronal Informatics**

#### 476 *Electron-Light Microscopy tools ELM*

ELM provides a user interface to manually define a three-dimensional warp field between a light microscopy data set and the whole-brain EM dataset by specifying corresponding landmark points. It was built on top of the BigWarp Fiji plugin (Bogovic et al., 2016), which in turn was built on top of the BigDataViewer plugin (Pietzsch et al., 2015) for FIJI (Schindelin et al., 2012). ELM is aware of standard compartment boundary models available for the template fly brains and provides hotkeys to view the labels for these compartments; to go between coordinates in ELM and the EM dataset as viewed in CATMAID; and to go from a CATMAID URL to the corresponding point in ELM. ELM is available at <https://github.com/saalfeldlab/elm>.

#### *Transforming data between EM and light microscopy templates: elmr*

elmr (<https://github.com/jefferis/elmr>) is a package written in R (<http://www.r-project.org>) to facilitate bidirectional transfer of 3D data between adult brain EM and light level data.

#### *Neuropil surface models*

Previously defined surface models of the whole fly brain and MB calyx (Ito et al., 2014; Manton et al., 2014), based on the same template brain as the virtualflybrain.org project (<https://github.com/VirtualFlyBrain/DrosAdultBRAINDomains>), were transformed to the EM volume using elmr. The AL glomerulus meshes were generated in Blender ([www.blender.org](http://www.blender.org)) from EM-reconstructed skeletons of PN dendrites and olfactory receptor neuron termini (Schlegel et al., 2016).

#### QUANTIFICATION AND STATISTICAL ANALYSIS

## Comparison of signal-to-noise between volume EM datasets

Determining the signal to noise ratio (S/N) of biological images is in general a subjective task, due to its variance under non-linear transformations (Erdogmus et al., 2004). As users of this data will likely care about biological structures, the determination of S/N should account for this, considering only the level of signal of these structures and not of things such as staining or cutting artifacts. The problem of S/N determination has been thoroughly treated in the case of super-resolution imaging where these ambiguities don't exist (for a review, see Lambert and Waters, 2016; see also Supplementary Note 1 in Li et al., 2015), but as yet there are no universally accepted, automated techniques to calculate the S/N in individual images where signal is dense in both spatial and frequency spaces, such as EM data of brain neuropil.

We present two measures of S/N here, an automated measure which avoids user biases, but can include some signal in noise and background calculations (feature based signal-to-noise ratios) and a simple technique which gives more precise S/Ns but is prone to bias (the cell-edge technique) which we use to verify the feature based signal-to-noise calculation. We apply these techniques to a range of publicly available data in order to evaluate the TEMCA2 method, sample images from each dataset are shown in Figure S4A.

In both cases we assume that noise is additive (and is independent of the magnitude of the signal) and symmetric. Such an assumption is likely false (e.g. electron shot noise is Poissonian and not symmetric at low numbers), however, such impacts are likely small based on manual examination of images and we assume the impacts of such an assumption are the same for all techniques. Such assumptions may fail however at very low signals where CCD and shot noise dominates, or at high signals, where processes such as non-linearity in CCD absorption become important.

## 524 *Feature based signal-to-noise ratios*

525 Fundamentally a signal-to-noise calculation of an image involves a calculation of the  
526 background level, the variation in this background level (which is assumed to be due to noise)  
527 and the calculation of the difference between the regions of interest and this background.  
528 Detecting what these regions are provides a challenge in EM data where images may not have  
529 clear background regions and where noise is contributed to through sample preparation.

530 In order to measure the S/N we assume that in any given image, the structures of interest  
531 provide the majority of features above the noise. That is, most structures present are biological  
532 in nature, rather than artifacts of sample preparation. Therefore with this assumption, it can be  
533 further assumed that key-points detected by feature detection algorithms will disproportionately  
534 fall on the regions of interest.

535 Given that animal cells and structures therein tend to be “blobby” due to hydrostatic processes  
536 (Jiang and Sun, 2013), we use a blob-detection algorithm (which compares areas of interest, c.f.  
537 edge or corner detection) to identify areas of interest. We use the SURF algorithm (Bay et al.,  
538 2008), though SIFT (Lowe, 2004), BRIEF (Calonder et al., 2010) or other detection algorithms  
539 should provide enough feature locations to produce similar results (see for example (Kashif et  
540 al., 2016) and references therein).

541 Following the above, the variation in intensity of an image,  $I$ , in the local region of many feature  
542 points is likely to be mostly due to signal, and the variation in intensity nearby few (or no) feature  
543 points will be dominated by noise. The determination of such regions is done by generating an  
544 array of equal size to the original image and for each element, setting it to one if there is a  
545 feature in the corresponding element of the image. This array is then convolved with a Gaussian  
546 of width  $n$ , where  $n$  is chosen to maximize the SNR in a random selection of five images from  
547 each sample in an effort to avoid bias between samples.

548 To select a region dominated by noise we then shuffle this array before sorting it (to avoid  
549 biases in sorting algorithms) and take the lowest point. We then block out a region  $2n$  square  
550 and resort the array nine more times (for a total of ten selected regions), forming the set of  
551 points  $p_{low}$ . We likewise perform a selection for the points of maximum variation ( $p_{high}$ ). See  
552 Figure S4B for an illustration of the entire process.

553 To determine the level of noise, we first generate a copy of the image to which a  
554 three pixel median filter has been applied. We then subtract this median image from the original  
555 to generate a noise dominated image,  $I'$ . At each of the minimum feature points (where noise is  
556 most dominant); the standard deviation of this image is taken over a three pixel square  
557 neighborhood. The level of noise,  $N$ , is then calculated as the mean of these standard  
558 deviations, i.e.,

$$559 \quad N = \langle \sigma[I'(p_{low} \pm 1)] \rangle. (1)$$

560 The background level of the image,  $B$ , is determined by taking the mean of these noise-  
561 dominated regions (again taking a mean over the three pixel neighborhood), following on from  
562 the assumption of symmetric noise, giving

563

$$564 \quad B = \langle \langle I(p_{low} \pm 1) \rangle \rangle. (2)$$

565

566 The level of signal is then taken to be the mean of the (absolute) difference of the mean of these  
567 three pixel neighborhoods around  $p_{high}$ , and the background. This results in the SNR being given  
568 by

569

$$S/N = \frac{\langle |I(p_{high} \pm 1) - B| \rangle}{N}. \quad (3)$$

571

572 As most images lack large areas that consist of only resin, this simple background selection is  
573 not perfect, as such the S/Ns generated should be considered lower limits in most cases. We  
574 show the S/N as a function of the acquisition rate for a variety of EM techniques in figure 2C.

575 This measure works reasonably well when combining voxels producing S/Ns within 20% (1.5  
576 dB) of the expected based on additive Gaussian noise (Figure S4C), although the ATUM data of  
577 Kasthuri et al. (2011) increases by more than others, a possible sign of their voxels (3x3 nm in  
578 X-Y) under-sampling biological features. This method produces the expected increase when  
579 scaling down images producing equivalent normalized S/Ns (Figure S4C). Increasing the size  
580 of images also increases the S/N, but this is due to the generation of new pixels with similar  
581 values to old ones inside the regions considered for noise due to the fact that creation of these  
582 new pixels functions as a pseudo-low pass filter. As expected this measure reports larger S/N  
583 values when Gaussian blurring is applied (as noise is disproportionately removed when a low  
584 pass filter is applied) (Figure S4C). In images generated by super resolution techniques  
585 therefore, this method may be inappropriate and should be modified to, for example, use  
586 distance based regions rather than pixel based regions.

587

#### 588 *Cell-membrane signal-to-noise*

589 Although the feature based signal-to-noise measure avoids many human biases in the selection  
590 of regions used to calculate background and signal levels, it unfortunately can often incorporate  
591 biological structure (our signal of interest) into these calculations.

We therefore introduce a complementary measure to compare the S/N of biological EM data and verify that the feature based signal-to-noise calculation is valid. At its heart, this is simply a comparison between the signal level at a cell edge and the background nearby, taken at multiple points within an image.

This is achieved by a user creating a line inside a random 100x100 pixel region which contains only resin and, ideally nearby, a line which covers only a stained cell boundary. Pixels along these lines (as selected by Bresenham's line algorithm (Bresenham, 1965)) are considered to be background or signal respectively. After selection of a background and signal line within each region, another 100x100 pixel region is chosen, until twenty lines in total (ten background, ten signal) are selected, skipping a region if there is not a suitable region in which to select both.

The noise is considered to be the standard deviation of the pixel intensities across all background intensities, and the background level the mean. The signal value is considered to be a mean of the signal pixels.

We show an example of the selection process in Figure S4D-E. Signal-to-noise ratios found via this method Figure S4E, are found to be within 10% of that found via the feature method, suggesting the former may be used for a fast, bias-free, comparison between methods.

608

## 609 **Analysis of neuronal geometry**

Data analysis was conducted using custom packages developed in R. We imported EM skeleton data from the CATMAID tracing environment using rcatmaid (<https://github.com/jefferis/rcatmaid>). Section thickness in CATMAID was specified to be 35 nm; all analyses of skeleton geometry therefore use this value. For qualitative and quantitative comparison with LM neurons, the EM skeletons were transformed into coordinate spaces of

615 various LM template brains using elmr based on landmark pairs defined with ELM (see above).  
 616 The R NeuroAnatomy Toolbox package (nat, <https://github.com/jefferis/nat>) was used for  
 617 geometric computations, 3D visualization of neuronal skeletons and surface models.

618

#### 619 *NBLAST neuron search for Projection Neurons*

620 The EM skeletons of PNs were transformed into the FCWB template brain space for NBLAST  
 621 neuron search against the ~400 LM PNs previously classified in the FlyCircuit dataset by  
 622 glomerulus (Costa et al., 2016). This is enabled by a single elmr function nbblast\_fafb. The  
 623 search functionality is built on the nat.nbblast package (<https://github.com/jefferislab/nat.nbblast>)  
 624 and uses data distributed with the flycircuit package (<https://github.com/jefferis/flycircuit>), both of  
 625 which are installed with elmr. Only PNs whose candidate glomerular types exist in the FlyCircuit  
 626 dataset are used. Since EM-reconstructed PNs often have many additional fine processes  
 627 compared with their LM counterparts, EM skeletons were used as NBLAST targets rather than  
 628 queries, in reverse to conventional NBLAST option. For each PN in EM, the top 5 hits of LM  
 629 neurons and their NBLAST scores are tabulated to aid and/or confirm expert glomerular  
 630 identification of PNs. Further details of the NBLAST neuron search, the associated LM data, and  
 631 an online web-app for on-the-fly NBLAST queries are available at <http://jefferislab.org/si/nblast>.

632

#### 633 *NBLAST clustering for PNs*

634 Pair-wise all by all NBLAST scores were computed for all uniglomerular PNs (nat.nbblast function  
 635 nbblast\_allbyall) after transformation into the JFRC2 template brain (Jenett et al., 2012) space  
 636 using elmr. We used unsupervised hierarchical clustering with Ward's method based on the

NBLAST scores (nat function nhclust). The unsquared Euclidean distance, rather than the default square of the Euclidean distance, is used as the Y axis for dendrograms.

# *Analysis and renderings of PN Arbors in Calyx*

We wished to quantify homotypic physical clustering of PNs in EM versus LM data. In summary, we randomly selected the same number of LM PNs as EM PNs from an existing LM database, subsetted the calyx arbors of the PNs with a calyx bounding box, and computed pair-wise geometric measures (mean nearest distance and NBLAST scores). Mean nearest distance quantifies physical co-location of arbors while NBLAST scores measure morphological similarity for a given pair of neurons. Details are as follows.

LM datasets (Chiang et al., 2011) of PNs previously registered to a common template brain (Costa et al., 2016) were used for comparisons with EM PNs. From the LM dataset we first determined which glomeruli had multiple EM and LM tracings available. One glomerulus, DA3, was excluded because in LM data DA3 has *en passant* collaterals that do not enter the MB calyx (Jefferis et al., 2007). We then selected a random set of LM skeletons so that we had the same number of LM and EM skeletons for each glomerulus.

Both EM and LM PNs were transformed onto a common template brain, the JFRC2 template used by virtualflybrain.org (Manton et al., 2014), and resampled with a 1  $\mu$ m interval to ensure uniform representation of skeletons. PN collaterals in the calyx were obtained by two steps: 1) subset the skeletons with a bounding box defined by the right-side calyx surface model from the neuropil segmentation generated and used by the Virtual Fly Brain (Ito et al., 2014; Manton et al., 2014; Milyaev et al., 2012); 2) remove the backbone of each PNs so only the *en passant* collaterals entering the calyx are used for distance calculation.

For each glomerulus, geometric measures (mean nearest distance and NBLAST scores) were computed for each pair-wise combination of PNs of the same type. For mean nearest distance, we iterated over each node of the query neuron to find the nearest node in the target neuron, measured the Euclidean distance, and calculate the mean distance for all nodes in the query neurons (forward distance). When the query neuron is significantly larger than target neuron, artifactually long nearest distance can be introduced by end points in the larger neuron being far away from closest nodes from the smaller neuron. To address this issue, we calculated the same mean nearest distance with the query neuron and target neuron in reverse (reverse distance) and picked only the smaller of the forward and reverse distances. To quantify morphological similarity, NBLAST scores were computed for PN arbors in calyx in a similar pair-wise manner. The distributions of all intra-glomerular pairwise mean distances and NBLAST scores of PNs were plotted, and for both measures the difference between EM and LM population data were analyzed with a Student t-test.

To visualize only calyx arbors of PNs, a calyx bounding box as defined by calyx neuropil segmentation in the Virtual Fly Brain template brain (JFRC2) was used to subset both EM and LM PN skeletons. Boutons of PNs in calyx are delimited by tagged nodes bordering bouton blocks of the skeletons (See Neuron Tracing). Only skeletons in PN boutons are kept for rendering concentric organizations of boutons in calyx. For all tracing visualizations, linear interpolation of neighbouring skeleton nodes was applied to smoothen artifactual spikes in neuron tracing due to registration or alignment errors.

680

## 681 DATA AND SOFTWARE AVAILABILITY

682 All files and movies are available through the following website: <http://www.temca2data.org>

683

## 684 ADDITIONAL RESOURCES

685 Access to the full adult fly brain data set is available at: <http://www.temca2data.org>

686 Analysis code is available at: [https://github.com/dbock/bocklab\\_public/tree/master/temca2data](https://github.com/dbock/bocklab_public/tree/master/temca2data)

687

## 688 Supplemental Figure and Table Legends

689

### 690 **Figure S1. Neuronal Architecture of the MB Calyx. Related to Figure 1.**

691 (A) TEM micrograph of a calycal microglomerulus. A canonical olfactory PN axonal varicosity  
 692 (bouton) is presynaptic to several KC dendritic claws. This architecture is collectively referred to  
 693 as a microglomerulus. The PN terminal (pink) provides input to KC neurites at synaptic sites.  
 694 Arrows: presynaptic release sites.

695 (B) Schematic of microglomerular inputs to KCs in calyx of *Drosophila*. The PN axons from AL  
 696 extend collaterals into the calyx and form boutons containing synapses to claw-shaped  
 697 dendrites from several KCs. The complete composition of cell types that provide driving inputs in  
 698 microglomerular form in the calyx is unknown, as is the distribution of other KC inputs outside of  
 699 claws. KCs have been shown to form presynaptic release sites in the calyx most of which, but  
 700 not all, are outside of claws, and the complete postsynaptic partner cohort is unknown. Scale  
 701 Bar: 1  $\mu$ m in (A).

702

### 703 **Figure S2. Fast Stage Step and Settle, Overview of Details. Related to Figure 1.**

704 (A) TEMCA equipped with Fast Stage. Arrowheads: Fast Stage (black); elongated vacuum  
 705 chamber (white); 2 x 2 camera array (red).

706 (B) Upper panel: Schematic of Fast Stage showing the locations of bearings, dampers and  
 707 vacuum bellows. Left: driven mass; Right: exterior view. Lower panel: Cut away of Fast Stage.  
 708 Arrows: rolling element damper locations (black arrows); vacuum bellows (black arrowhead);  
 709 rolling-element 'tip' bearing (white arrowhead).

710 (C) Plot of Fast Stage motion over time following an 8  $\mu\text{m}$  move.

711 (D) Schematic of Fast Stage stepping pattern. Left: small step/ big step schematic. Numbers  
 712 are camera numbers. Right: Scanning axes and stages. Red point is origin of scanning.

713 (E) Autoloader (white arrowhead) mounted to an accessory port on FEI Tecnai Spirit BioTWIN.

714 (F) Schematic of the Autoloader system diagramming motor positions and movement axes as well  
 715 as vacuum and pneumatic subsystems.

716

717 **Movie S1. Fast Stage vs. FEI CompuStage. Related to Figure 1.**

718 Movie showing the acquisition of 2 fields of view using the FEI CompuStage (left) as compared  
 719 to the custom FastStage acquiring 17 fields of view (right) in the same time.

720 Scale Bar: 1  $\mu\text{m}$ .

721

722 **Movie S2. Autoloader Cutaway. Related to Figure 1.**

723 CAD movie of Autoloader detailing actions to retrieve and image a sample.

724

725 **Movie S3. Autoloader Pick-and-Place. Related to Figure 1.**

726 Movie of Autoloader pick-and-place routine. The Autoloader locates the grid within the cassette,  
 727 moves to a pre-pick location, confirms positioning, picks grid from cassette in a two step process  
 728 with positioning assessments during the process, moves to the aligner, assesses the rotational  
 729 angle of the grid, if necessary places the grid on the aligner and aligns the grid, retrieves the  
 730 grid from the aligner, and inserts into the TEM column (insertion to column not shown).  
 731 Following imaging, the Autoloader locates the correct cassette pocket, confirms positioning,  
 732 replaces the grid in the cassette, and confirms that the grid is correctly located within the  
 733 cassette. Changes in image quality indicate a change in camera frame rate. High quality  
 734 images are used for positional assessments; lower quality images are used for diagnostic  
 735 purposes.

736

737 **Figure S3. Sample Preparation for Electron Microscopy. Related to Figure 1.**

738 (A) *D. melanogaster* brain following sample preparation.  
 739 (B) 3D volumetric rendering of X-ray tomogram data from embedded *D. melanogaster* brain.  
 740 (C) Sample support test showing a failed result with wrinkling of the support film on 3mm grid.  
 741 (D) Sample support test showing a successful result with no wrinkling or relaxation of the  
 742 support film evident.

743 Scale Bars: 250  $\mu$ m in (A-B).

744

745 **Figure S4. Comparison of S/N Between EM Imaging Methods. Related to Figure 2.**

746 (A) Sample images from a variety of EM data sources. From left to right, ATUM-SEM (Kasthuri  
 747 et al., 2015), FIB-SEM (Takemura et al., 2015), SBEM (Briggman et al., 2011), ssTEM

748 (Takemura et al., 2013), TEMCA1 (Bock et al., 2011), TEMCA2 (this paper). The top row shows  
749 images of side length 3  $\mu\text{m}$  while the lower row shows 100 pixel subimages of each. The  
750 corresponding areas of these 100 pixel subimages are shown with a black square inside each  
751 image.

752 (B) From left to right, a TEMCA2 image sample, the key-points detected in the image,  
753 convolution of the key-points illustrating dense and sparse feature regions (purple – low, yellow  
754 high), the region of sparse features selected from the TEMCA2 image showing a resin filled  
755 area suitable for noise calculation.

756 (C) For all plots points and data sources are as per Figure 2G and Table S3. The normalized  
757 S/N versus acquisition rates of a variety of EM techniques (as color coded) are shown for  
758 different methods. From left to right, feature-based method as described in (B); Stacked Voxels  
759 means that voxels are combined across a layer (SBEM not shown due to alignments not being  
760 clear) and across 50 random images; Reduced Res means that voxels correspond to a higher  
761 physical size across 100 random images; Scaled Up Res means that voxels correspond to a  
762 smaller physical size across 100 random images; Gaussian Blur means that voxels have been  
763 blurred with a Gaussian filter across 100 random images.

764 (D) Left, sample image shows a region selected to quantify the noise (green) and a region to  
765 quantify the signal (red) for the cell-edge technique. Right, the intensity for noise and signal  
766 regions versus number of pixels in each region.

767 (E) Normalized S/N versus acquisition rate as determined via the cell-edge technique across 5  
768 random images from each technique (same color codes as Figure S4C), each of which had 10  
769 regions of background/noise and signal determined. Points and data sources are as per Figure  
770 2G and Table S3.

771

772 **Figure S5. Re-imaging Synapses in Pedunculus, Montaging, and Intensity Correction in**  
 773 **2D. Related to Figure 2.**

774 (A-B) Matching ~1.25um wide fields of view in section 3887 from the imaged volume (A) and re-  
 775 imaged at higher resolution (B). (A) 4nm/pixel; (B) 1.3nm/pixel

776 (C-E) Montaging high-dose and low-dose. Debris present on a section necessitated collection  
 777 of a small subset of tiles at lower dose than the remainder of the mosaic.

778 (C) The debris and border of the low-dose mosaic can be seen in the context of the entire  
 779 section.

780 (D) Debris and mosaic boundary are clearly visible.

781 (E) The boundary of the joined high-dose and low-dose mosaics is evident (arrowheads).

782 (F-G) 2D intensity correction. (F) Mosaic of a single section prior to 2D intensity correction.  
 783 Intensity differences between tiles are evident in (G).

784 (H-I) (H) Same section as in (F) following 2D intensity correction. Intensity differences between  
 785 tiles are greatly diminished (I).

786 Scale Bars: 200 nm in (A-B), 100  $\mu$ m in (C), 50  $\mu$ m in (D), 2  $\mu$ m in (E), 100  $\mu$ m in (F, H), 2  $\mu$ m in  
 787 (G, I).

788

789 **Figure S6. Reliable Tracing. Related to Figure 2.**

790 (A-C) Three teams, each comprising 1 tracer and 1 proofreader, reconstructed the same  
 791 neuron, with each team blinded to the others.

792 (A) Synaptic counts and gross morphologies are comparable across teams. Arrows indicate  
793 location of synapse shown IN TEM inset. Asterisks in inset indicate locations of a single KC  
794 fingertip postsynaptic to the PN input.

795 (B) Zoom-in to a claw with an input discrepancy across teams. Gold team discovered a *bona*  
796 *fide* process with 6 postsynapses to a putative PN input. Green team discovered 1/5 of the  
797 postsynapses on the proximal portion of this process but was not confident to trace the process  
798 further. Purple team was not confident to trace this process at all.

799 (C) Network connectivity matched with only 1 inferior input difference shown by red node (PN7).  
800 Orange nodes indicate projection neuron bouton inputs to the KC. One putative PN input was  
801 missed by team 2, indicated by red box. Colored skeletons (A) and graph nodes (B) and indicate  
802 team membership: team 1, green; team 2, gold; team 3, magenta.

803 Scale bars: ~20  $\mu$ m in (A), 250 nm in (A) inset, ~2  $\mu$ m in (B).

804

805 **Table S1. NBLAST Scores for PNs. Related to Figure 4.**

806

807 **Figure S7. EM versus LM PNs. Related to Figure 5.**

808 (A) Qualitative comparison of calyx collaterals of EM versus LM PNs. Only skeletons inside the  
809 calyx bounding box is shown, as described in Methods. Only LM PNs from (Jefferis et al. 2007)  
810 are used. Glomeruli are ordered by the difference of mean distances between homotypic EM  
811 PNs and LM PNs. Left column, EM PNs. Middle column, the pair of LM PNs with median pair-  
812 wise mean nearest distances. Right column, LM PNs.

(B) Pair-wise NBLAST scores for calyx collaterals of homotypic PNs. Glomeruli are ordered by the difference of NBLAST scores between EM and LM PNs. Each data point represents the NBLAST scores between the calyx collaterals of a pair of PNs from the same glomerulus.

(C) Histogram of NBLAST scores across all glomeruli. The average NBLAST scores were significantly higher for PNs in EM than PNs in LM (EM:  $0.55 \pm 0.19$ , LM:  $0.35 \pm 0.19$ , t test p-value  $3.6e-15$ ), indicating that EM PNs are morphologically more similar to each other than LM PNs.

Scale bar:  $\sim 10 \mu\text{m}$  in (A).

## **Table S2. KC Postsynaptic Partners in the MB Main Calyx. Related to Figure 7.**

Eighty-seven percent of the KC postsynaptic targets are driven by  $\alpha\beta\text{c-}$ ,  $\alpha\beta\text{s-}$ , or  $\gamma$  KCs. The  $\alpha'\beta'$  KCs drive only 13%. Only 4 neurons are responsible for 75% of the postsynaptic partners. The  $\alpha'\beta'$  KCs are only presynaptic to other KCs and the APL.

## **Movie S4. Whole Brain EM Volume. Related to Figure 1.**

All sections through the dataset are shown. Left, a low-resolution view of the entire section extent. White square is centered on x,y position of the microglomerulus shown in Figure S1A. Right, a zoom-in on a field of view at the center of the white square in the low-resolution view. Section number 5372 shows the microglomerulus of Figure S1A.

## **Movie S5. Neuropils Innervated by MB-CP2. Related to Figure 6.**

834 A previously unidentified neuron, MB-CP2 (orange skeleton), shown inside the whole brain  
835 mesh (gray outline) and several other neuropil meshes obtained via LM and registered to the  
836 EM volume. MB-CP2 is purely postsynaptic (blue dots) in several regions and both pre- (red  
837 dots) and postsynaptic in other regions (first synapse isolation). MB-CP2 innervates the MB  
838 (patina), where it is postsynaptic to  $\gamma$  and  $\gamma_d$  KCs in the MB pedunculus (second synaptic  
839 isolation; MB-CP2 skeleton subsequently isolated in blue), and presynaptic to all olfactory KC  
840 subtypes at microglomeruli in the MB calyx (second synaptic isolation; MB-CP2 skeleton  
841 subsequently isolated in red), where it also receives input from currently unknown cell types.  
842 Additionally, it is pre- and postsynaptic in the dAC (compartment mesh not shown), LH, and  
843 SLP. MB-CP2 innervates the antlers (cyan), LH (blue), posterior lateral protocerebrum (green),  
844 superior clamp (magenta), superior medial protocerebrum (red), superior intermediate  
845 protocerebrum (gold), and superior lateral protocerebrum (pink) where it is purely postsynaptic  
846 (shown in first synaptic isolation). See Figure 6G for synaptic input/output summary schematic  
847 by neuropil. Initial axes: dorsal, top; ventral, bottom. Movie begins from an anterior perspective.

848

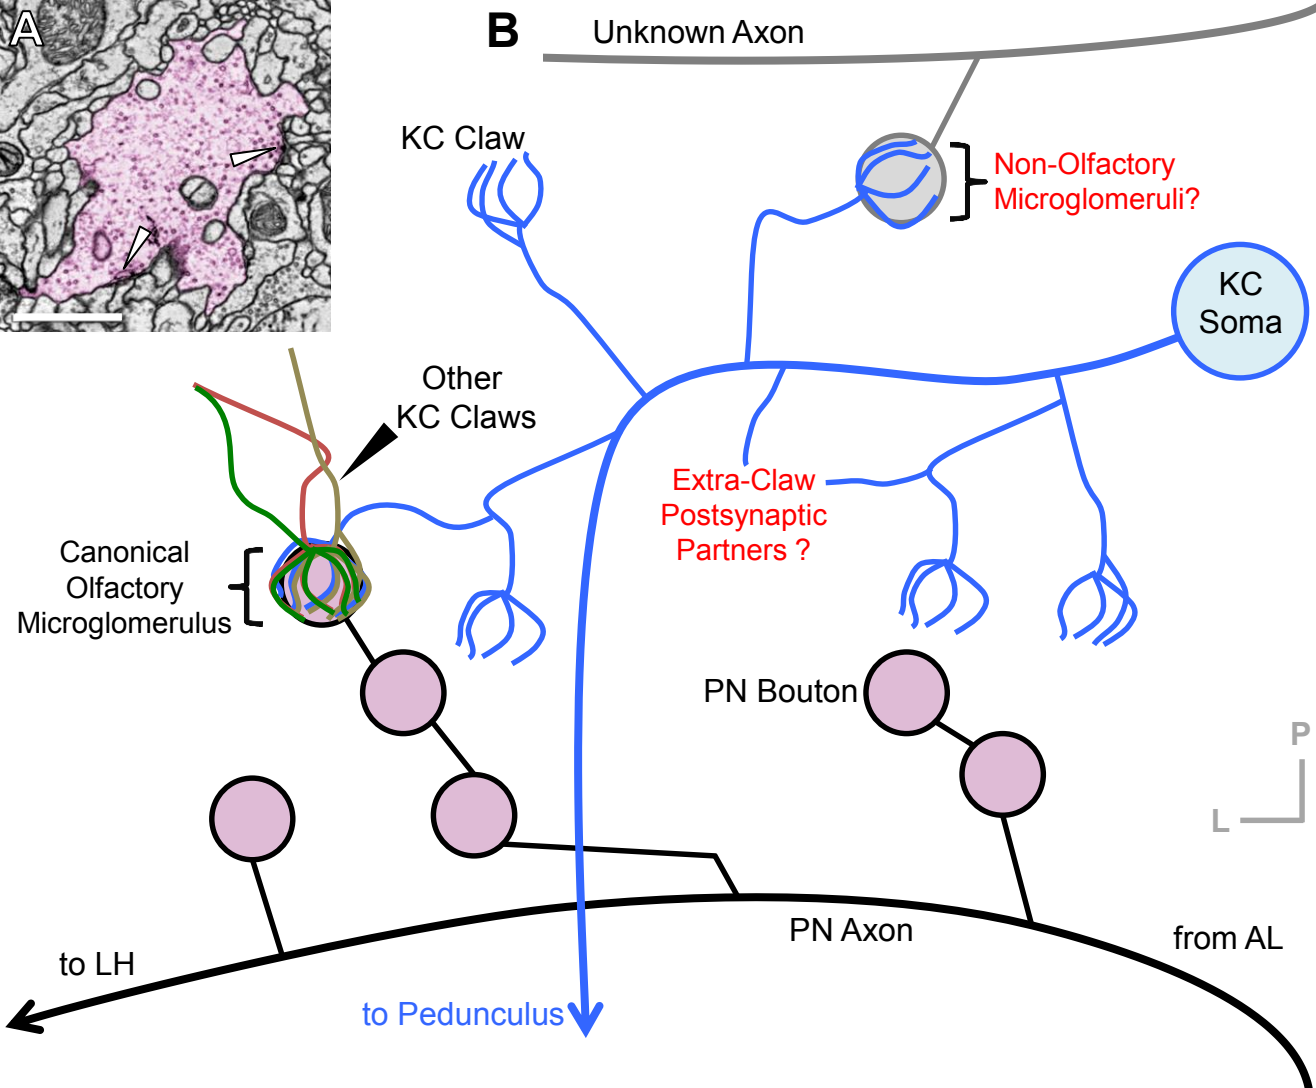

**Figure S1. Neuronal Architecture of the MB Calyx. Related to Figure 1.**

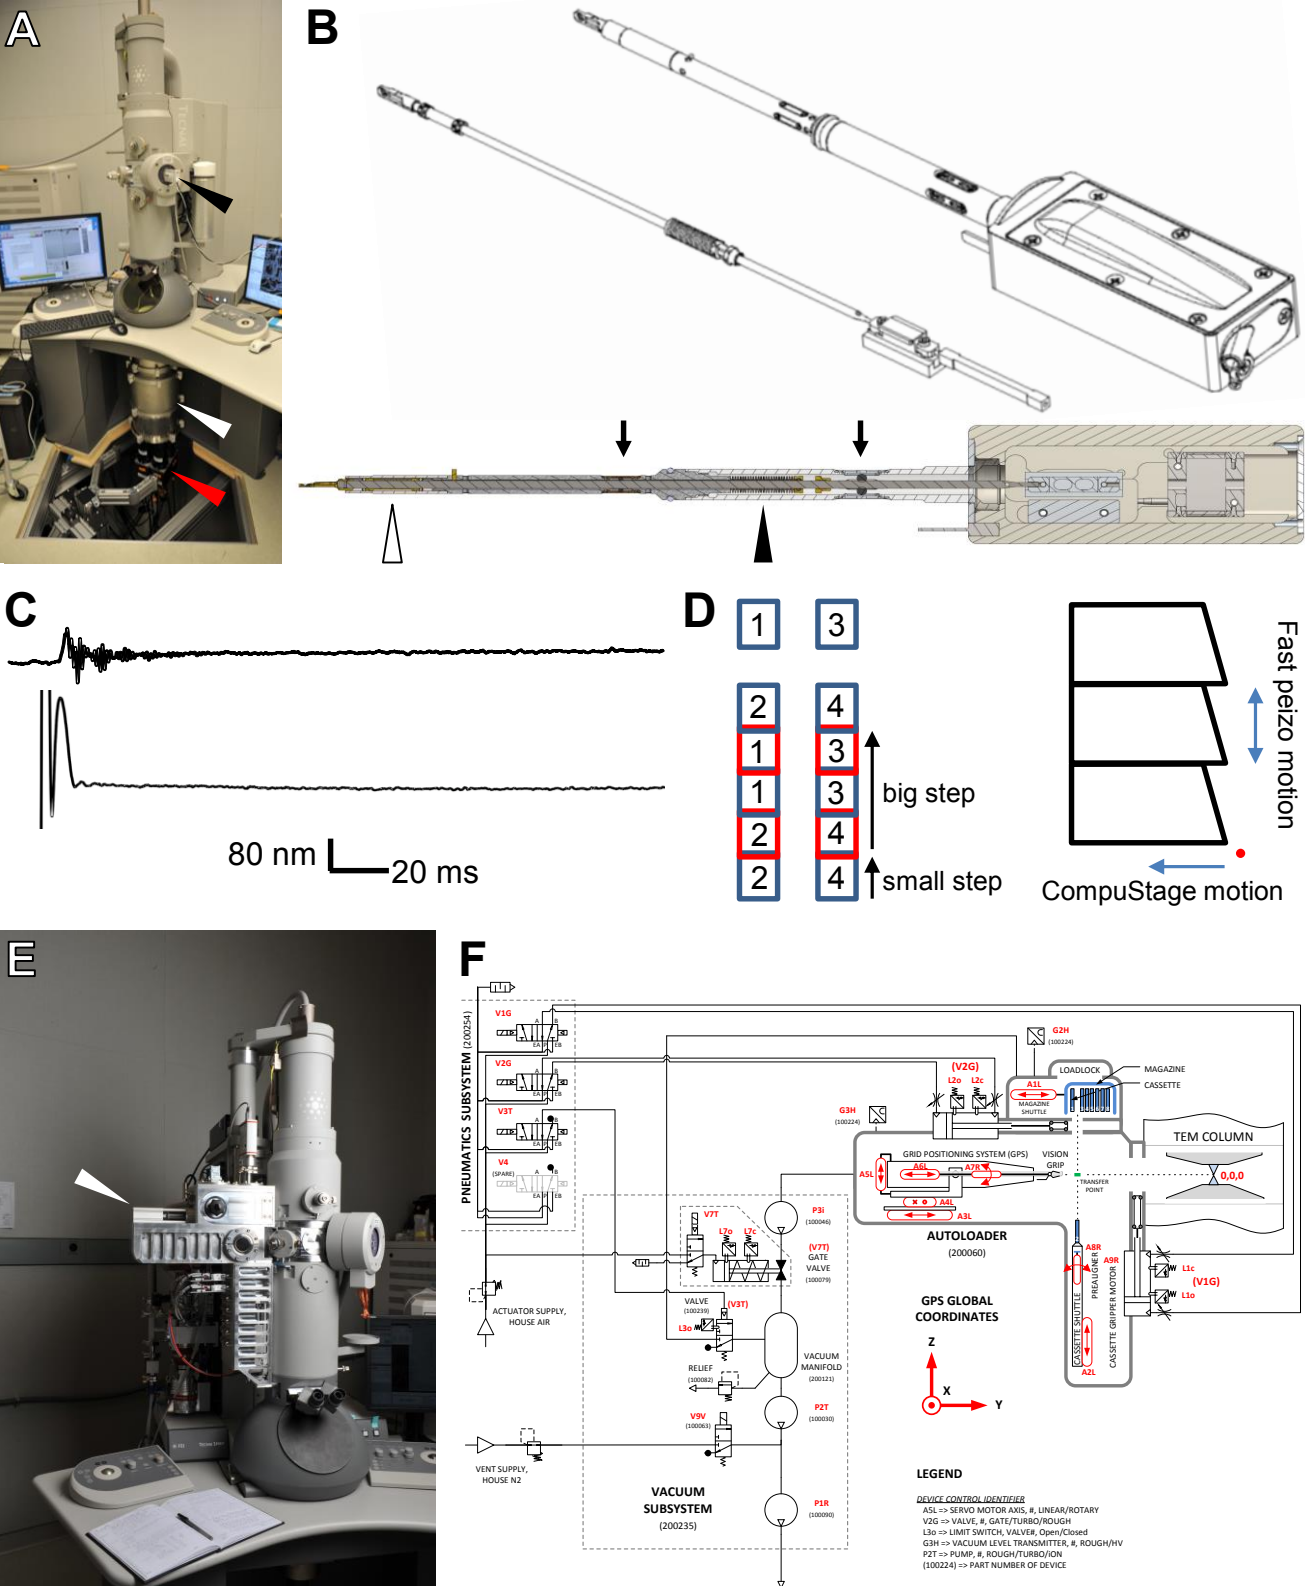

**Figure S2. Fast Stage Step and Settle, Overview of Details. Related to Figure 1.**

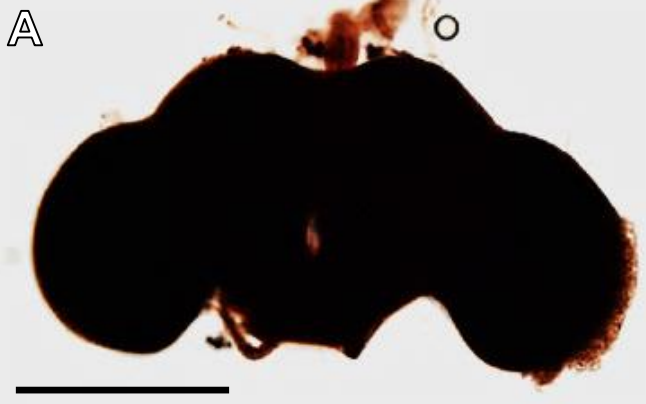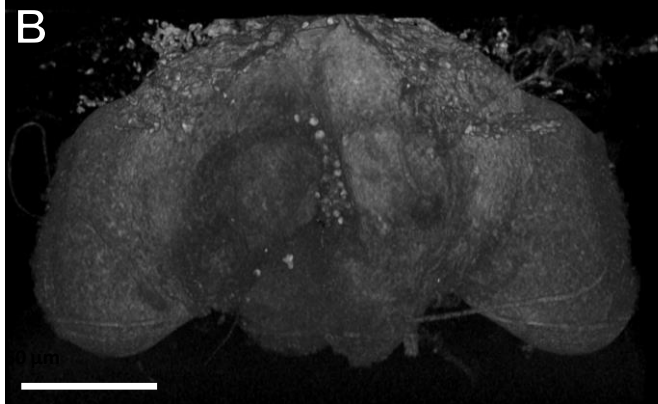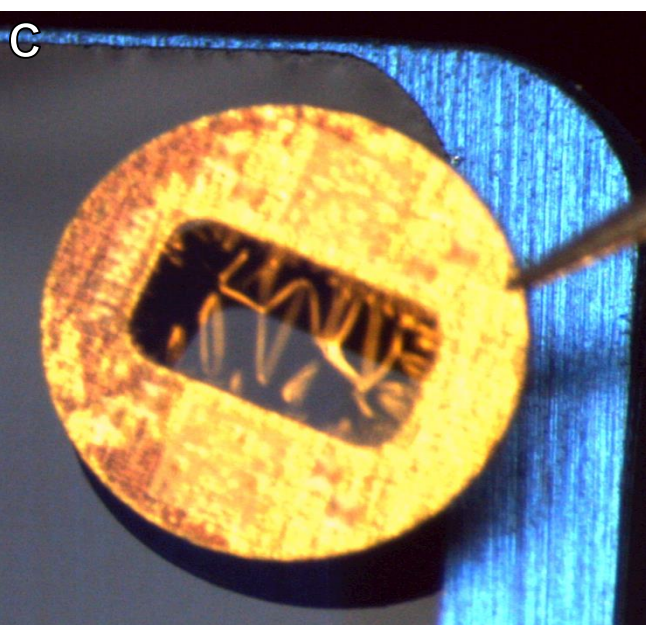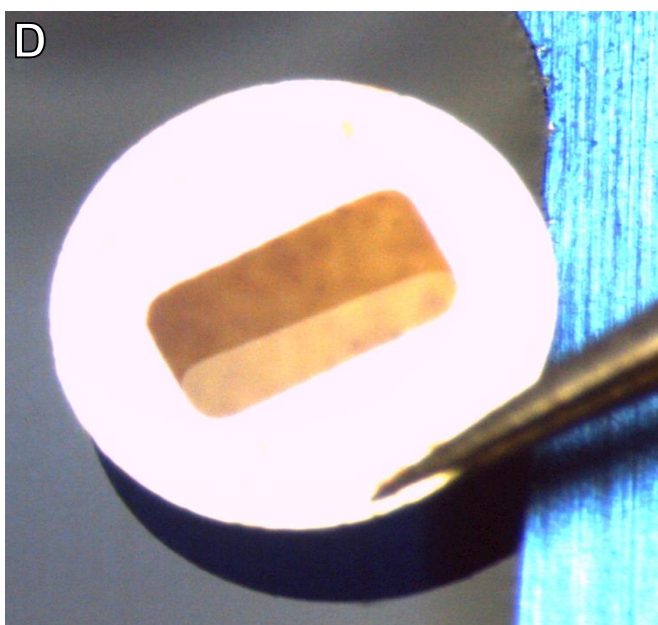

**Figure S3. Sample Preparation for Electron Microscopy. Related to Figure 1.**

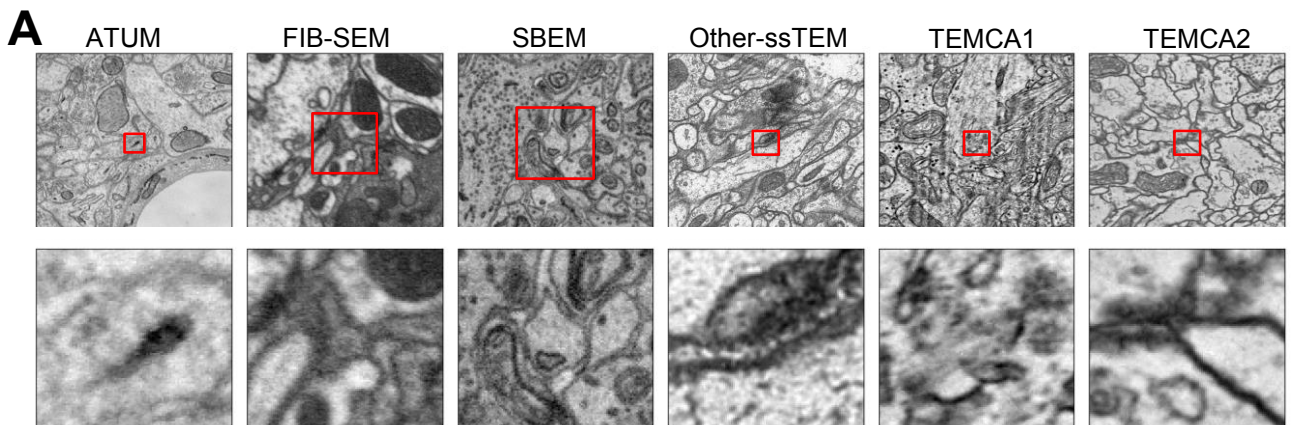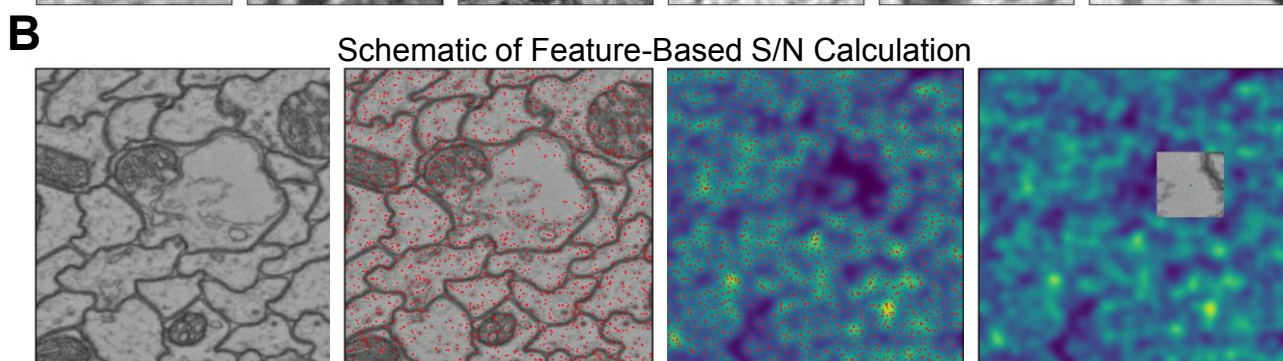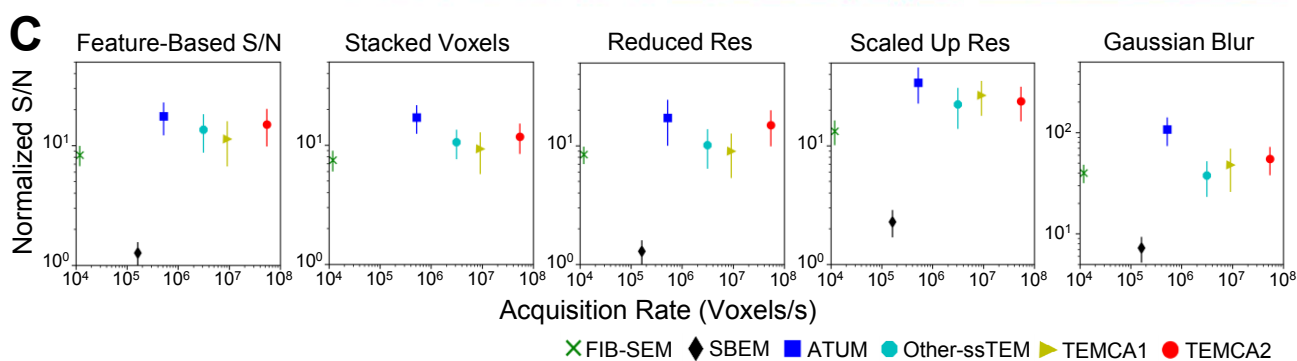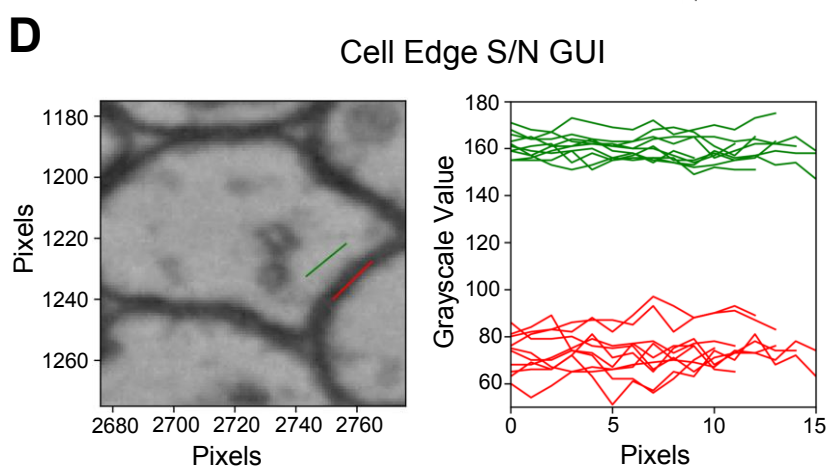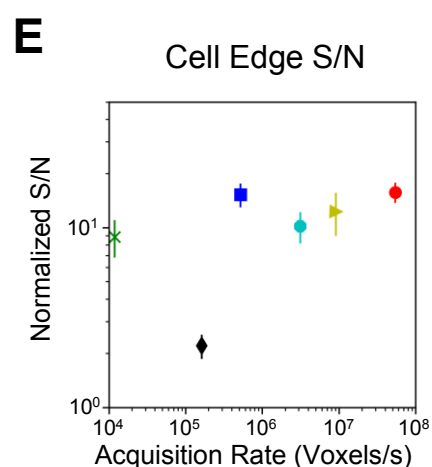

**Figure S4. Comparison of S/N Between EM Imaging Methods. Related to Figure 2.**

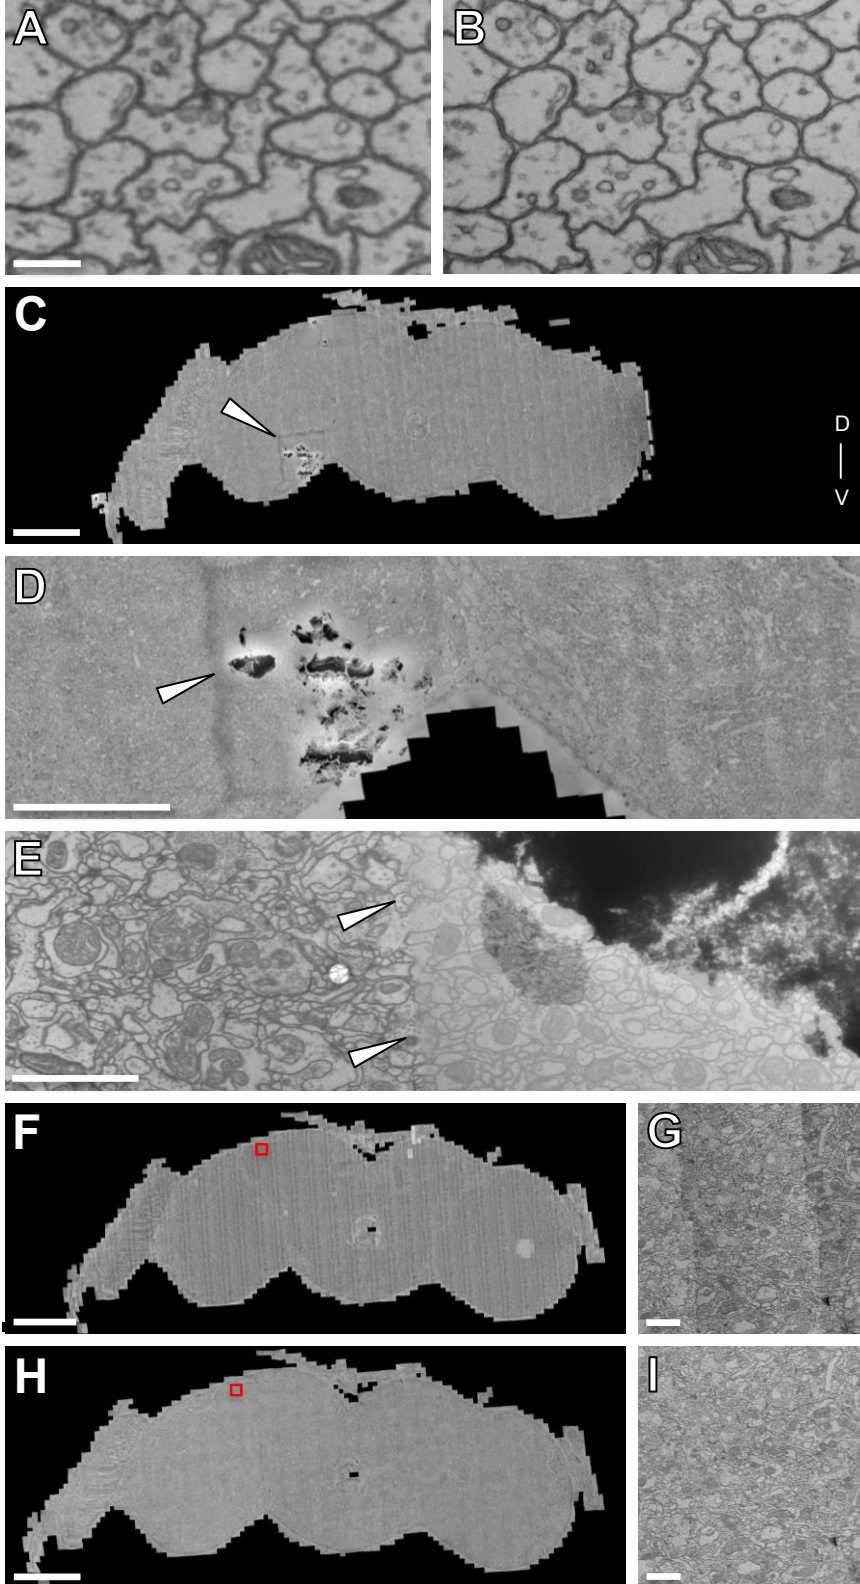

**Figure S5. Re-imaging Synapses in Pedunculus, Montaging, and Intensity Correction in 2D. Related to Figure 2.**

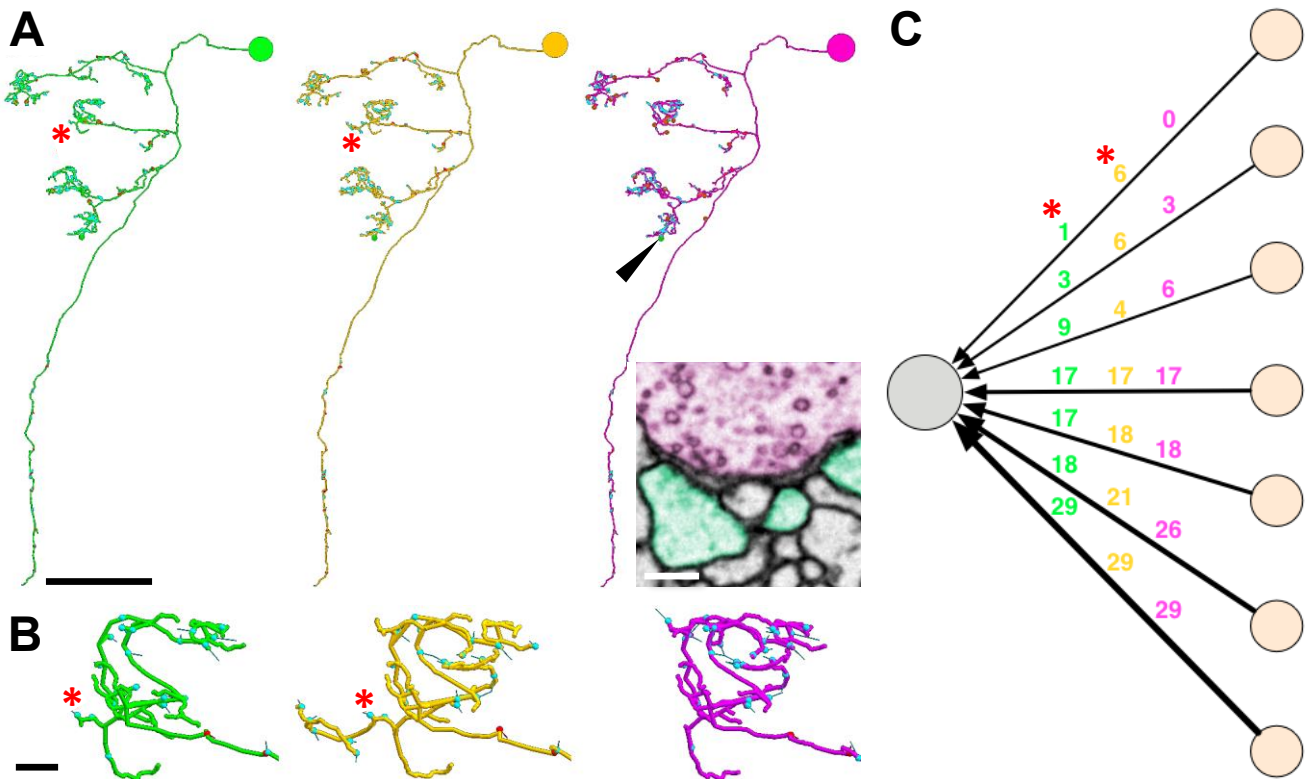

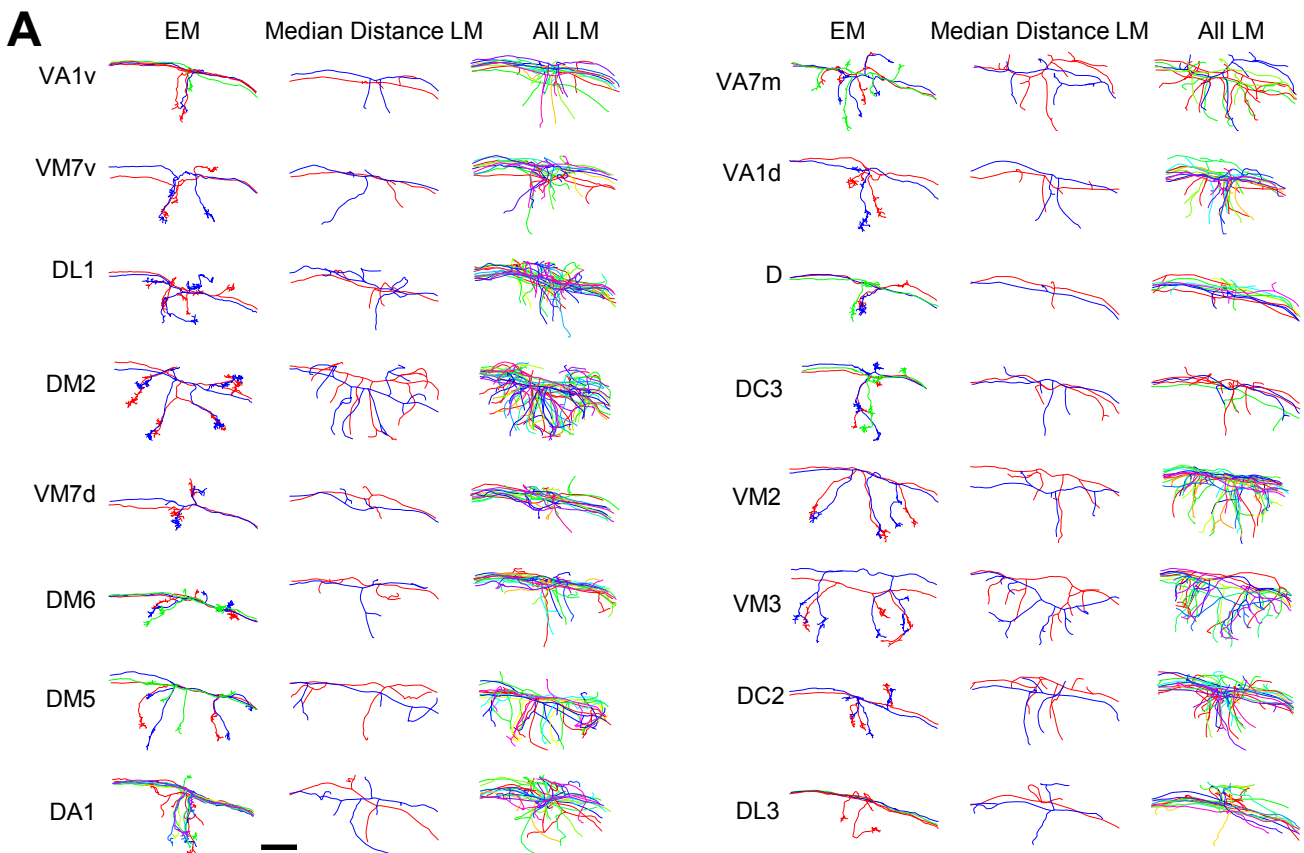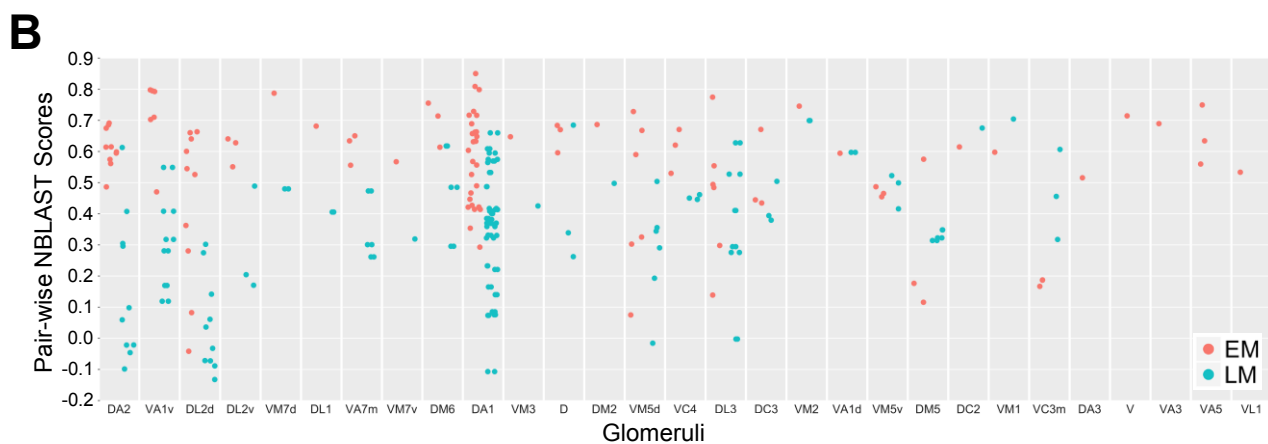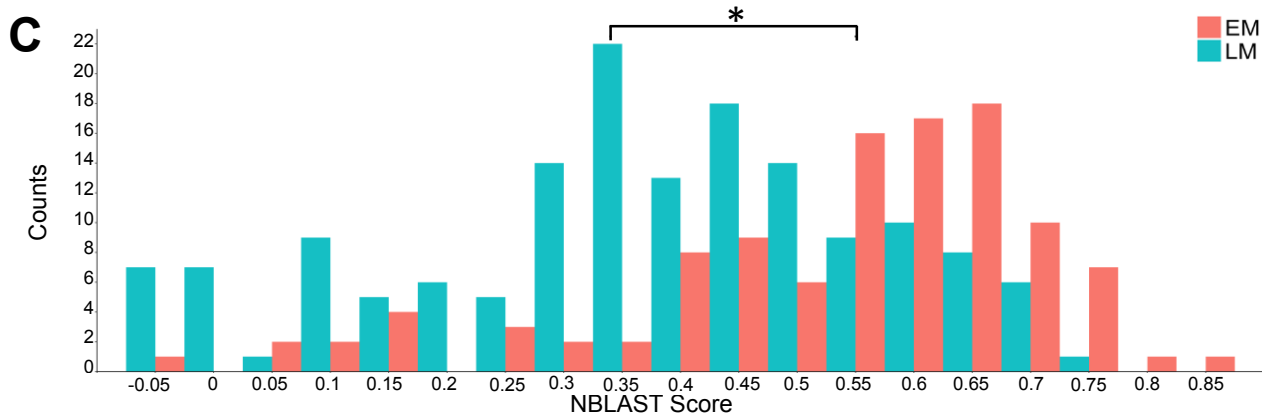

**Figure S7. EM versus LM PN. Related to Figure 5.**

| PN      | skeleton ids | expert identification | match        | NBLAST results |              |            |       |            |       |            |       |            |       |
|---------|--------------|-----------------------|--------------|----------------|--------------|------------|-------|------------|-------|------------|-------|------------|-------|
|         |              |                       |              | 1st hit        |              | 2nd hit    |       | 3rd hit    |       | 4th hit    |       | 5th hit    |       |
|         |              |                       |              | glomerulus     | score        | glomerulus | score | glomerulus | score | glomerulus | score | glomerulus | score |
| 27295   | DA1          | 1st                   | DA1          | 0.697          | DA1          | 0.688      | DA1   | 0.685      | DA1   | 0.683      | DA1   | 0.672      |       |
| 57311   | DA1          | 1st                   | DA1          | 0.701          | DA1          | 0.686      | DA1   | 0.682      | DA1   | 0.680      | DA1   | 0.657      |       |
| 57323   | DA1          | 1st                   | DA1          | 0.653          | DA1          | 0.635      | DA1   | 0.634      | DA1   | 0.633      | DA1   | 0.626      |       |
| 57353   | DA1          | 1st                   | DA1          | 0.656          | DA1          | 0.645      | DA1   | 0.625      | DA1   | 0.618      | DA1   | 0.617      |       |
| 57381   | DA1          | 1st                   | DA1          | 0.717          | DA1          | 0.697      | DA1   | 0.693      | DA1   | 0.678      | DA1   | 0.673      |       |
| 61221   | DA1          | 1st                   | DA1          | 0.685          | DA1          | 0.684      | DA1   | 0.681      | DA1   | 0.681      | DA1   | 0.678      |       |
| 755022  | DA1          | 1st                   | DA1          | 0.635          | DA1          | 0.618      | DA1   | 0.613      | DA1   | 0.605      | DA1   | 0.604      |       |
| 2863104 | DA1          | 1st                   | DA1          | 0.657          | DA1          | 0.640      | DA1   | 0.634      | DA1   | 0.633      | DA1   | 0.624      |       |
| 38885   | DA2          | 1st                   | DA2          | 0.639          | DA2          | 0.621      | DA2   | 0.619      | DA2   | 0.589      | DA2   | 0.563      |       |
| 53631   | DA2          | 1st                   | DA2          | 0.583          | DA2          | 0.555      | DA2   | 0.529      | DA2   | 0.522      | DA2   | 0.513      |       |
| 57418   | DA2          | 1st                   | DA2          | 0.635          | DA2          | 0.623      | DA2   | 0.622      | DA2   | 0.592      | DA2   | 0.578      |       |
| 57422   | DA2          | 1st                   | DA2          | 0.615          | DA2          | 0.604      | DA2   | 0.602      | DA2   | 0.581      | DA2   | 0.549      |       |
| 1785034 | DA2          | 1st                   | DA2          | 0.602          | DA2          | 0.601      | DA2   | 0.596      | DA2   | 0.564      | DA2   | 0.526      |       |
| 65762   | DC2          | 1st                   | DC2          | 0.551          | DA2          | 0.537      | DA2   | 0.514      | DA2   | 0.508      | DA2   | 0.498      |       |
| 32399   | DC3          | 1st                   | DC3          | 0.577          | VA1v         | 0.480      | VA1d  | 0.459      | VA1d  | 0.449      | VA1v  | 0.446      |       |
| 57241   | DC3          | 1st                   | DC3          | 0.513          | VA1d         | 0.428      | VA1d  | 0.400      | DA1   | 0.393      | VA1v  | 0.376      |       |
| 57414   | DC3          | 1st                   | DC3          | 0.581          | VA1d         | 0.457      | VA1d  | 0.442      | VA1d  | 0.428      | VA1v  | 0.425      |       |
| 27303   | DL1          | 1st                   | DL1          | 0.644          | DL1          | 0.639      | DL1   | 0.622      | DL1   | 0.612      | DL1   | 0.596      |       |
| 1775706 | DL1          | 1st                   | DL1          | 0.680          | DL1          | 0.655      | DL1   | 0.645      | DL1   | 0.641      | DL1   | 0.636      |       |
| 30791   | DL2d         | 1st                   | DL2d         | 0.670          | DL2d         | 0.652      | DL2d  | 0.646      | DL2d  | 0.644      | DL2d  | 0.641      |       |
| 57333   | DL2d         | 1st                   | DL2d         | 0.672          | DL2d         | 0.670      | DL2d  | 0.670      | DL2d  | 0.666      | DL2d  | 0.664      |       |
| 57337   | DL2d         | 1st                   | DL2d         | 0.712          | DL2d         | 0.695      | DL2d  | 0.693      | DL2d  | 0.693      | DL2d  | 0.690      |       |
| 57341   | DL2d         | 1st                   | DL2d         | 0.704          | DL2d         | 0.701      | DL2d  | 0.700      | DL2d  | 0.682      | DL2d  | 0.682      |       |
| 67637   | DL2d         | 1st                   | DL2d         | 0.625          | DL2d         | 0.609      | DL2v  | 0.605      | DL2d  | 0.601      | DL2d  | 0.593      |       |
| 22422   | DL2v         | 1st                   | DL2v         | 0.699          | DL2v         | 0.696      | DL2v  | 0.691      | DL2v  | 0.686      | DL2v  | 0.681      |       |
| 56623   | DL2v         | 1st                   | DL2v         | 0.664          | DL2v         | 0.661      | DL2v  | 0.651      | DL2v  | 0.650      | DL2v  | 0.646      |       |
| 61773   | DL2v         | 1st                   | DL2v         | 0.690          | DL2v         | 0.683      | DL2v  | 0.682      | DL2v  | 0.676      | DL2v  | 0.673      |       |
| 33903   | DL3          | 1st                   | DL3          | 0.673          | DA1          | 0.644      | DA1   | 0.614      | DA1   | 0.608      | DA1   | 0.602      |       |
| 77661   | DL3          | 1st                   | DL3          | 0.637          | DA1          | 0.601      | DA1   | 0.595      | DA1   | 0.581      | DL3   | 0.580      |       |
| 581536  | DL3          | 1st                   | DL3          | 0.638          | DA1          | 0.609      | DA1   | 0.605      | DA1   | 0.605      | DA1   | 0.589      |       |
| 23829   | DL4          | 1st                   | DL4          | 0.594          | DA1          | 0.574      | DL1   | 0.458      | DL1   | 0.434      | VM7   | 0.275      |       |
| 30891   | DM1          | 1st                   | DM1          | 0.671          | putative VA4 | 0.491      | DM5   | 0.463      | DM5   | 0.433      | VC2   | 0.428      |       |
| 22594   | DM5          | 1st                   | DM5          | 0.604          | DM5          | 0.599      | VM5d  | 0.533      | VM5d  | 0.510      | VM5d  | 0.509      |       |
| 27611   | DM5          | 1st                   | DM5          | 0.587          | VM5d         | 0.580      | VM5d  | 0.561      | VM5d  | 0.561      | VM5d  | 0.557      |       |
| 57307   | DM6          | 1st                   | DM6          | 0.601          | DM6          | 0.596      | DM6   | 0.594      | DM6   | 0.579      | DM6   | 0.575      |       |
| 60799   | DM6          | 1st                   | DM6          | 0.633          | DM6          | 0.627      | DM6   | 0.600      | DM6   | 0.593      | DM6   | 0.589      |       |
| 68697   | DM6          | 1st                   | DM6          | 0.581          | DM6          | 0.577      | DM6   | 0.567      | DM6   | 0.565      | DM6   | 0.565      |       |
| 27048   | DP1l         | 1st                   | DP1l         | 0.665          | DP1l         | 0.530      | DL2v  | 0.463      | DL2v  | 0.460      | DL2v  | 0.456      |       |
| 27884   | V            | 1st                   | V            | 0.540          | V            | 0.382      | V     | 0.367      | VP1   | 0.331      | V     | 0.225      |       |
| 192547  | V            | 1st                   | V            | 0.511          | VP1          | 0.215      | V     | 0.109      | V     | 0.108      | DP1l  | 0.030      |       |
| 36390   | VA1d         | 1st                   | VA1d         | 0.631          | DC3          | 0.545      | VA1v  | 0.540      | VA1v  | 0.517      | VA1v  | 0.515      |       |
| 42421   | VA1d         | 1st                   | VA1d         | 0.561          | DC3          | 0.532      | VA1v  | 0.499      | VA1v  | 0.497      | VA1v  | 0.491      |       |
| 51080   | VA1v         | 1st                   | VA1v         | 0.627          | VA1v         | 0.620      | VA1v  | 0.610      | VA1v  | 0.605      | VA1v  | 0.602      |       |
| 52106   | VA1v         | 1st                   | VA1v         | 0.604          | VA1v         | 0.599      | VA1v  | 0.592      | VA1v  | 0.579      | VA1v  | 0.577      |       |
| 55125   | VA1v         | 1st                   | VA1v         | 0.614          | VA1v         | 0.585      | VA1v  | 0.585      | VA1v  | 0.577      | VA1v  | 0.574      |       |
| 57246   | VA1v         | 1st                   | VA1v         | 0.654          | VA1v         | 0.641      | VA1v  | 0.635      | VA1v  | 0.634      | VA1v  | 0.622      |       |
| 23569   | VA4          | 1st                   | putative VA4 | 0.580          | VC2          | 0.528      | DM5   | 0.495      | DM5   | 0.439      | DL2v  | 0.398      |       |
| 32214   | VA7m         | 1st                   | VA7m         | 0.600          | VA7m         | 0.568      | DA2   | 0.457      | VM1   | 0.445      | DL2d  | 0.420      |       |
| 36108   | VA7m         | 1st                   | VA7m         | 0.634          | VA7m         | 0.629      | DL2d  | 0.470      | DL2v  | 0.463      | DL2d  | 0.460      |       |
| 186573  | VA7m         | 1st                   | VA7m         | 0.587          | VA7m         | 0.581      | VC2   | 0.490      | DA2   | 0.458      | VM1   | 0.447      |       |
| 45242   | VC2          | 1st                   | VC2          | 0.640          | VC2          | 0.586      | DM5   | 0.483      | DM5   | 0.470      | VM1   | 0.460      |       |
| 22277   | VC3m         | 1st                   | VC3m         | 0.605          | VC3m         | 0.589      | VC3m  | 0.584      | VC3m  | 0.584      | VC3m  | 0.576      |       |
| 22744   | VC3m         | 1st                   | VC3m         | 0.591          | VC3m         | 0.584      | VC3m  | 0.584      | VC3m  | 0.581      | VC3m  | 0.576      |       |
| 400943  | VC3m         | 1st                   | VC3m         | 0.598          | VC3m         | 0.596      | VC3m  | 0.590      | VC3m  | 0.580      | VC3m  | 0.579      |       |
| 37935   | VC4          | 1st                   | VC4          | 0.593          | VC4          | 0.592      | VC4   | 0.563      | VC4   | 0.562      | VM7   | 0.500      |       |
| 42927   | VC4          | 1st                   | VC4          | 0.600          | VC4          | 0.554      | VC4   | 0.532      | VC4   | 0.512      | VM7   | 0.503      |       |
| 55085   | VC4          | 1st                   | VC4          | 0.607          | VC4          | 0.607      | VC4   | 0.568      | VC4   | 0.557      | VM5v  | 0.516      |       |
| 24726   | VM1          | 1st                   | VM1          | 0.690          | VM1          | 0.680      | VM1   | 0.679      | VM1   | 0.674      | VM1   | 0.673      |       |
| 775731  | VM1          | 1st                   | VM1          | 0.642          | VM1          | 0.631      | VM1   | 0.626      | VM1   | 0.624      | VM1   | 0.583      |       |
| 51886   | VM2          | 1st                   | VM2          | 0.639          | VM2          | 0.620      | VM2   | 0.616      | VM2   | 0.603      | VM2   | 0.574      |       |
| 54072   | VM2          | 1st                   | VM2          | 0.679          | VM2          | 0.658      | VM2   | 0.657      | VM2   | 0.642      | VM2   | 0.597      |       |
| 23597   | VM4          | 1st                   | VM4          | 0.465          | VM4          | 0.432      | VC3m  | 0.414      | VC3m  | 0.385      | VC3m  | 0.377      |       |
| 39139   | VM5d         | 1st                   | VM5d         | 0.598          | VM5d         | 0.597      | VM5v  | 0.589      | VM5d  | 0.583      | VM5d  | 0.570      |       |
| 23512   | VM5v         | 1st                   | VM5v         | 0.618          | VM5v         | 0.618      | VM5v  | 0.578      | VM5v  | 0.567      | VM5v  | 0.565      |       |
| 30434   | VM5v         | 1st                   | VM5v         | 0.596          | VM5v         | 0.587      | VM5v  | 0.581      | VM5v  | 0.562      | VM5v  | 0.552      |       |
| 53671   | VM5v         | 1st                   | VM5v         | 0.596          | VM5v         | 0.580      | VM5v  | 0.559      | VM5v  | 0.538      | VM5v  | 0.530      |       |
| 39254   | VM6          | 1st                   | VM6+VP2      | 0.596          | VC3m         | 0.499      | VC3m  | 0.481      | VC3m  | 0.478      | VC3m  | 0.478      |       |
| 40306   | VM7d         | 1st                   | VM7          | 0.654          | VM7          | 0.653      | VM7   | 0.633      | VM7   | 0.632      | VM7   | 0.622      |       |
| 40790   | VM7d         | 1st                   | VM7          | 0.605          | VM7          | 0.599      | VM7   | 0.595      | VM7   | 0.595      | VM7   | 0.584      |       |
| 24251   | VM7v         | 1st                   | VM7          | 0.537          | VM7          | 0.524      | VM7   | 0.517      | VM7   | 0.503      | VM7   | 0.503      |       |
| 43539   | VM7v         | 1st                   | VM7          | 0.541          | VM7          | 0.522      | VM7   | 0.507      | VM5d  | 0.502      | VM7   | 0.499      |       |
| 24622   | D            | 2nd                   | DL1          | 0.532          | D            | 0.523      | DL1   | 0.513      | DL1   | 0.509      | DL1   | 0.489      |       |
| 40637   | D            | 2nd                   | DL1          | 0.574          | D            | 0.562      | DL1   | 0.537      | DL1   | 0.521      | DL1   | 0.517      |       |
| 40749   | DA4m         | 2nd                   | DC2          | 0.531          | DA4          | 0.512      | DL4   | 0.479      | DA4   | 0.476      | DA2   | 0.470      |       |
| 57402   | DC2          | 2nd                   | DL1          | 0.515          | DC2          | 0.506      | VM7   | 0.482      | DA2   | 0.476      | DL1   | 0.475      |       |
| 27246   | VM3          | 2nd                   | putative VA4 | 0.539          | VM3          | 0.529      | VM2   | 0.520      | VM2   | 0.516      | VC4   | 0.495      |       |
| 35447   | VM5d         | 2nd                   | VM5v         | 0.638          | VM5d         | 0.633      | VM5v  | 0.632      | VM5v  | 0.624      | VM5v  | 0.601      |       |
| 49865   | VM5d         | 2nd                   | VM5v         | 0.603          | VM5d         | 0.568      | VM5d  | 0.546      | VM5d  | 0.542      | VM5d  | 0.540      |       |
| 57459   | DL3          | 4th                   | DA1          | 0.595          | DA1          | 0.592      | DA1   | 0.581      | DL3   | 0.580      | DA1   | 0.576      |       |
| 62434   | VM5d         | 4th                   | VM5v         | 0.635          | VM5v         | 0.625      | VM5v  | 0.613      | VM5d  | 0.603      | VM5v  | 0.599      |       |
| 35246   | D            | 5th                   | DL1          | 0.561          | DL1          | 0.559      | DL1   | 0.549      | DL1   | 0.532      | D     | 0.531      |       |
| 57385   | DM5          | N                     | DA2          | 0.530          | DM6          | 0.521      | DL2d  | 0.517      | DL2d  | 0.516      | DL2d  | 0.514      |       |
| 58686   | DP1m         | N                     | putative VA4 | 0.471          | DM5          | 0.459      | VC2   | 0.440      | DL2v  | 0.410      | DL2d  | 0.405      |       |
| 41308   | VM3          | N                     | VM2          | 0.478          | VC4          | 0.456      | VM2   | 0.446      | VC4   | 0.438      | VC4   | 0.413      |       |

**Table S1. NBLAST Scores for PN. Related to Figure 4.**
